# Supplementary material for: Synthesis and Evaluation of Chalcone-Quinoline Based Molecular Hybrids as Potential Anti-Malarial Agents
Source: MDPI journal article supplement (doi:10.3390/molecules26134093), 2021-07-05
Supplement: s1 [file s1]

## **SUPPLEMENTARY INFORMATION**

### **Synthesis and Evaluation of Chalcone-Quinoline based Molecular Hybrids as potential Anti-Malarial Agents**

**Bonani Vinindwa<sup>1</sup>, Godwin Akpeko Dziwornu<sup>2</sup>, Wayiza Masamba<sup>1\*</sup>,.**

<sup>1</sup>Department of Chemical and Physical Sciences, Faculty of Natural Sciences, Walter Sisulu University, Nelson Mandela Drive, Mthatha 5117, South Africa

<sup>2</sup>Department of Chemistry, University of Cape Town, Rondebosch 7700, South Africa.

**Correspondence:** [ymasamba@wsu.ac.za](mailto:ymasamba@wsu.ac.za)

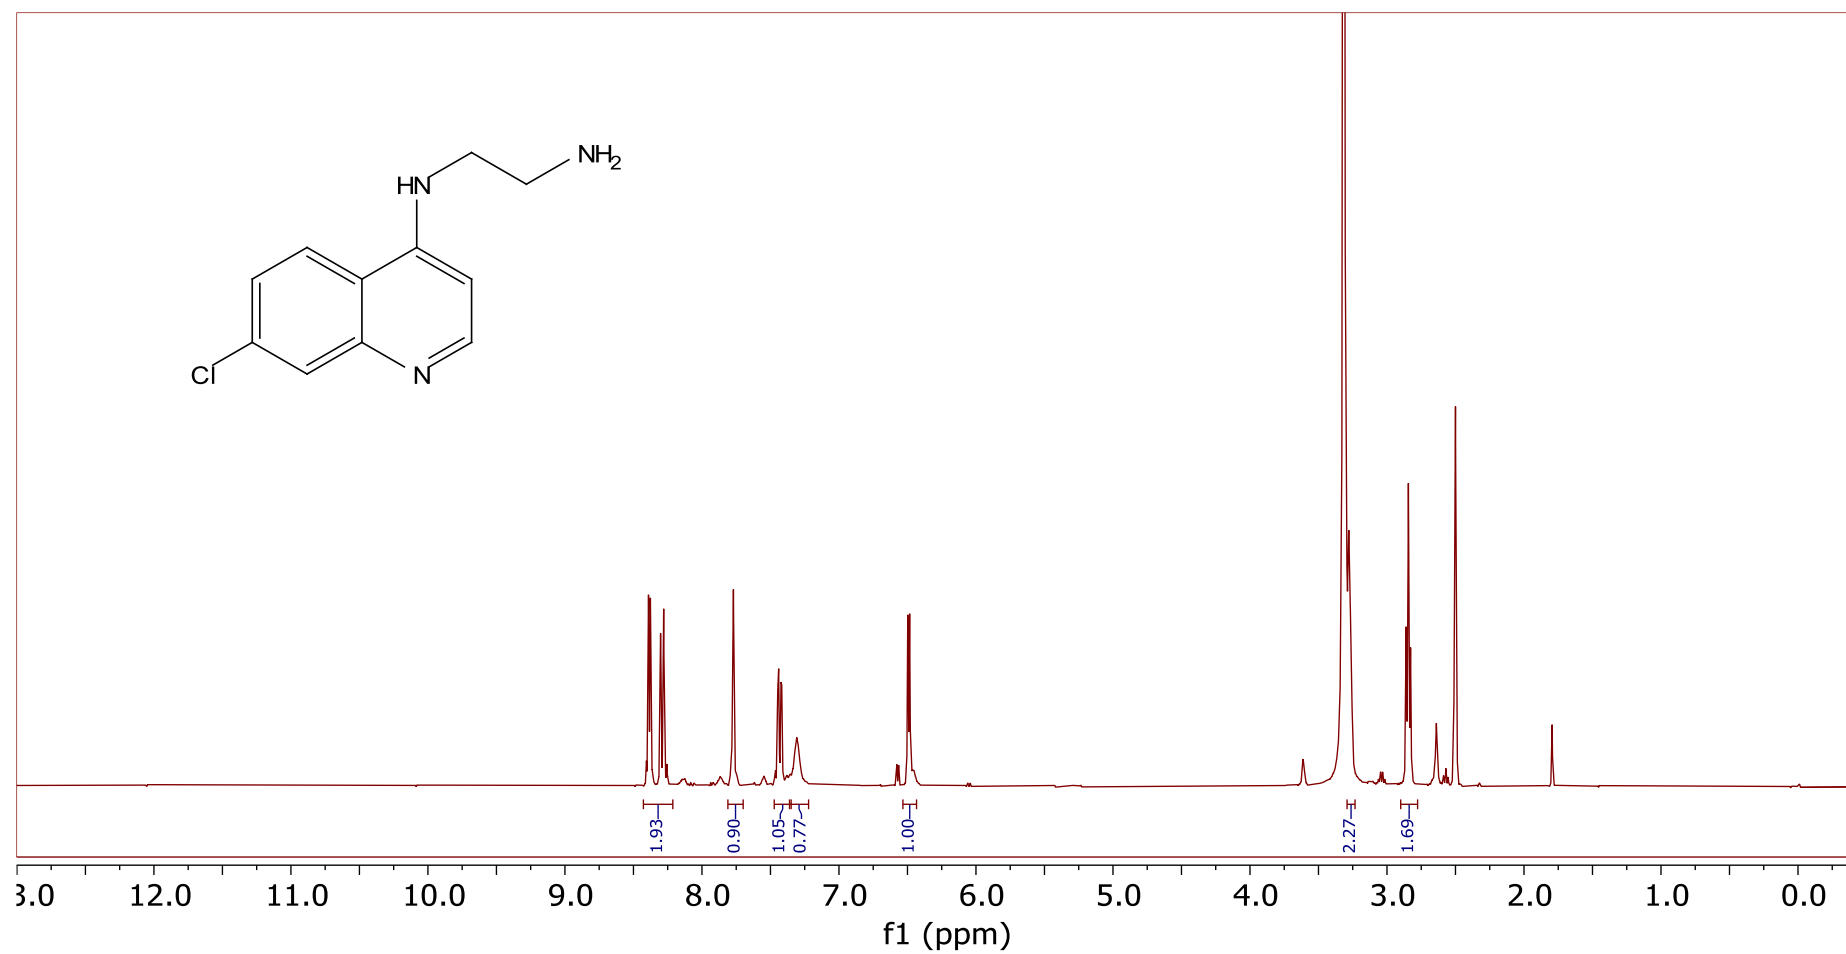

**S1:** <sup>1</sup>H NMR spectrum of *N*-(7-chloroquinolin-4-yl)ethane-1,2-diamine **2**

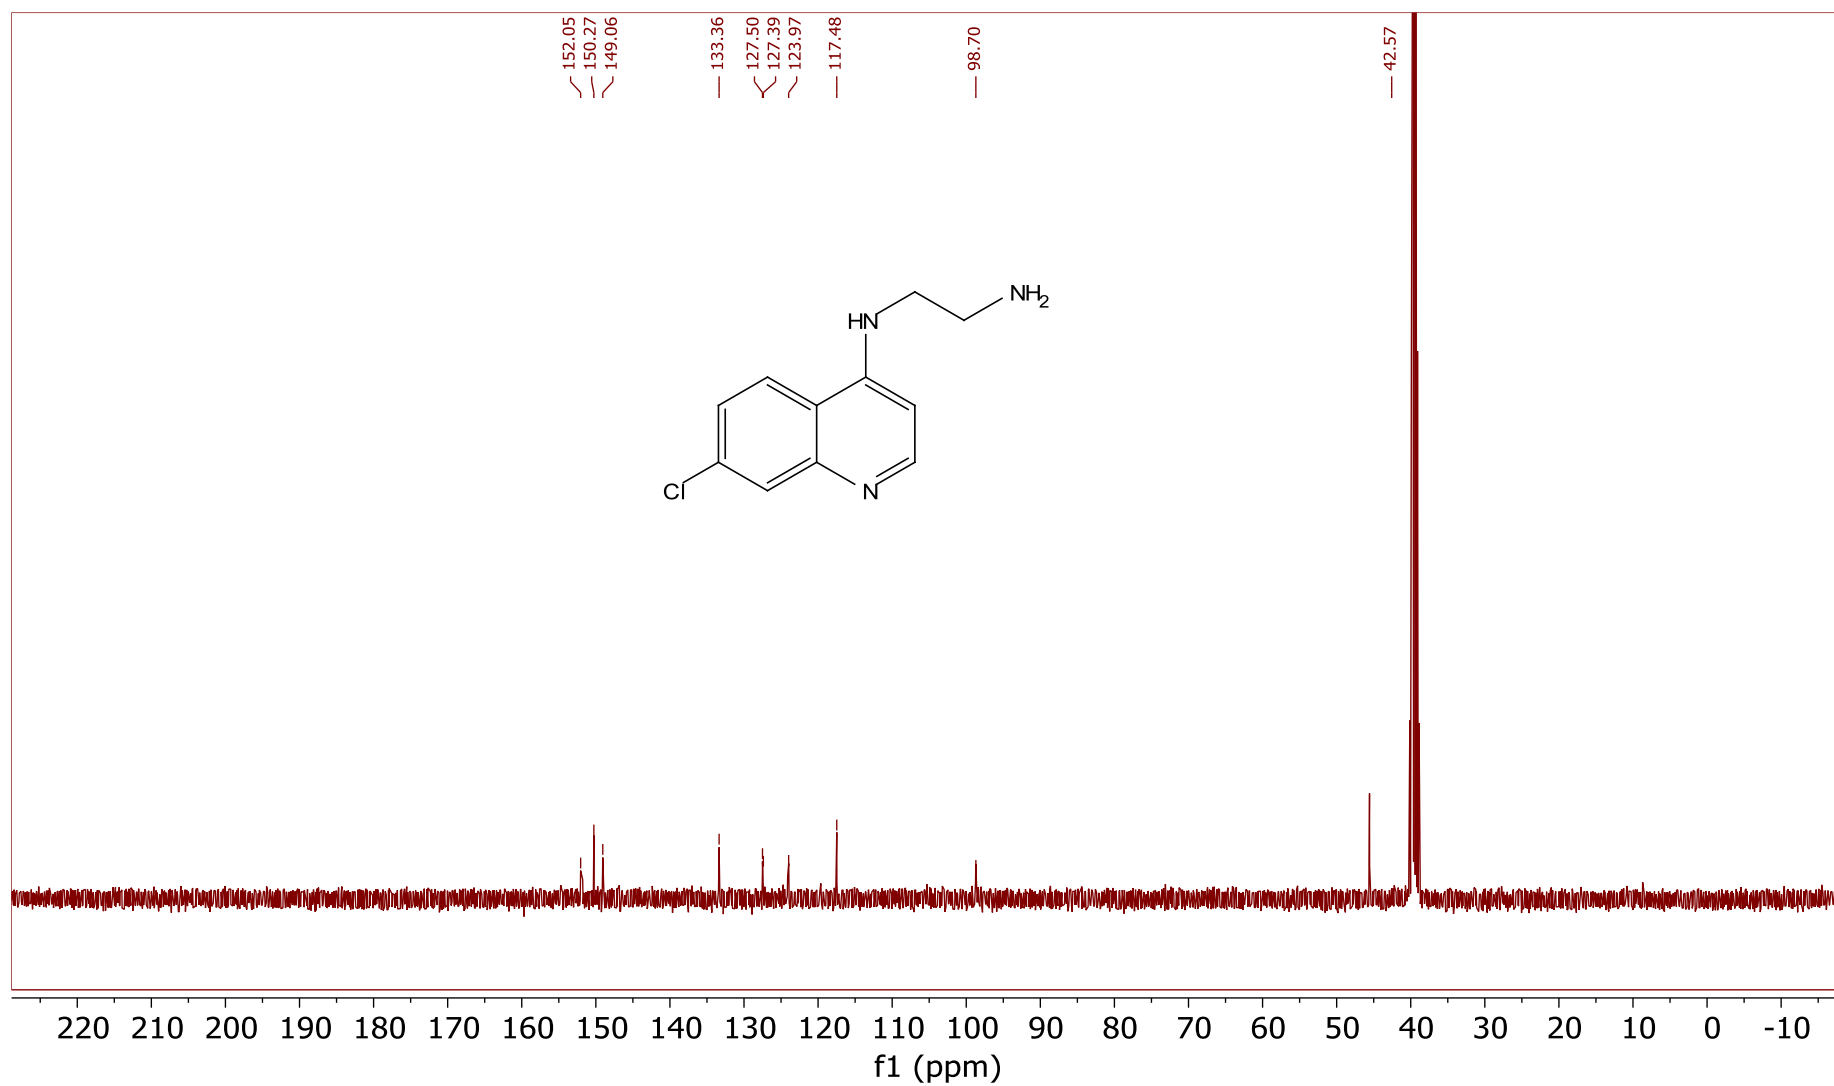

**S2:**  $^{13}\text{C}$  NMR spectrum of N-(7-chloroquinolin-4-yl)ethane-1,2-diamine **2**

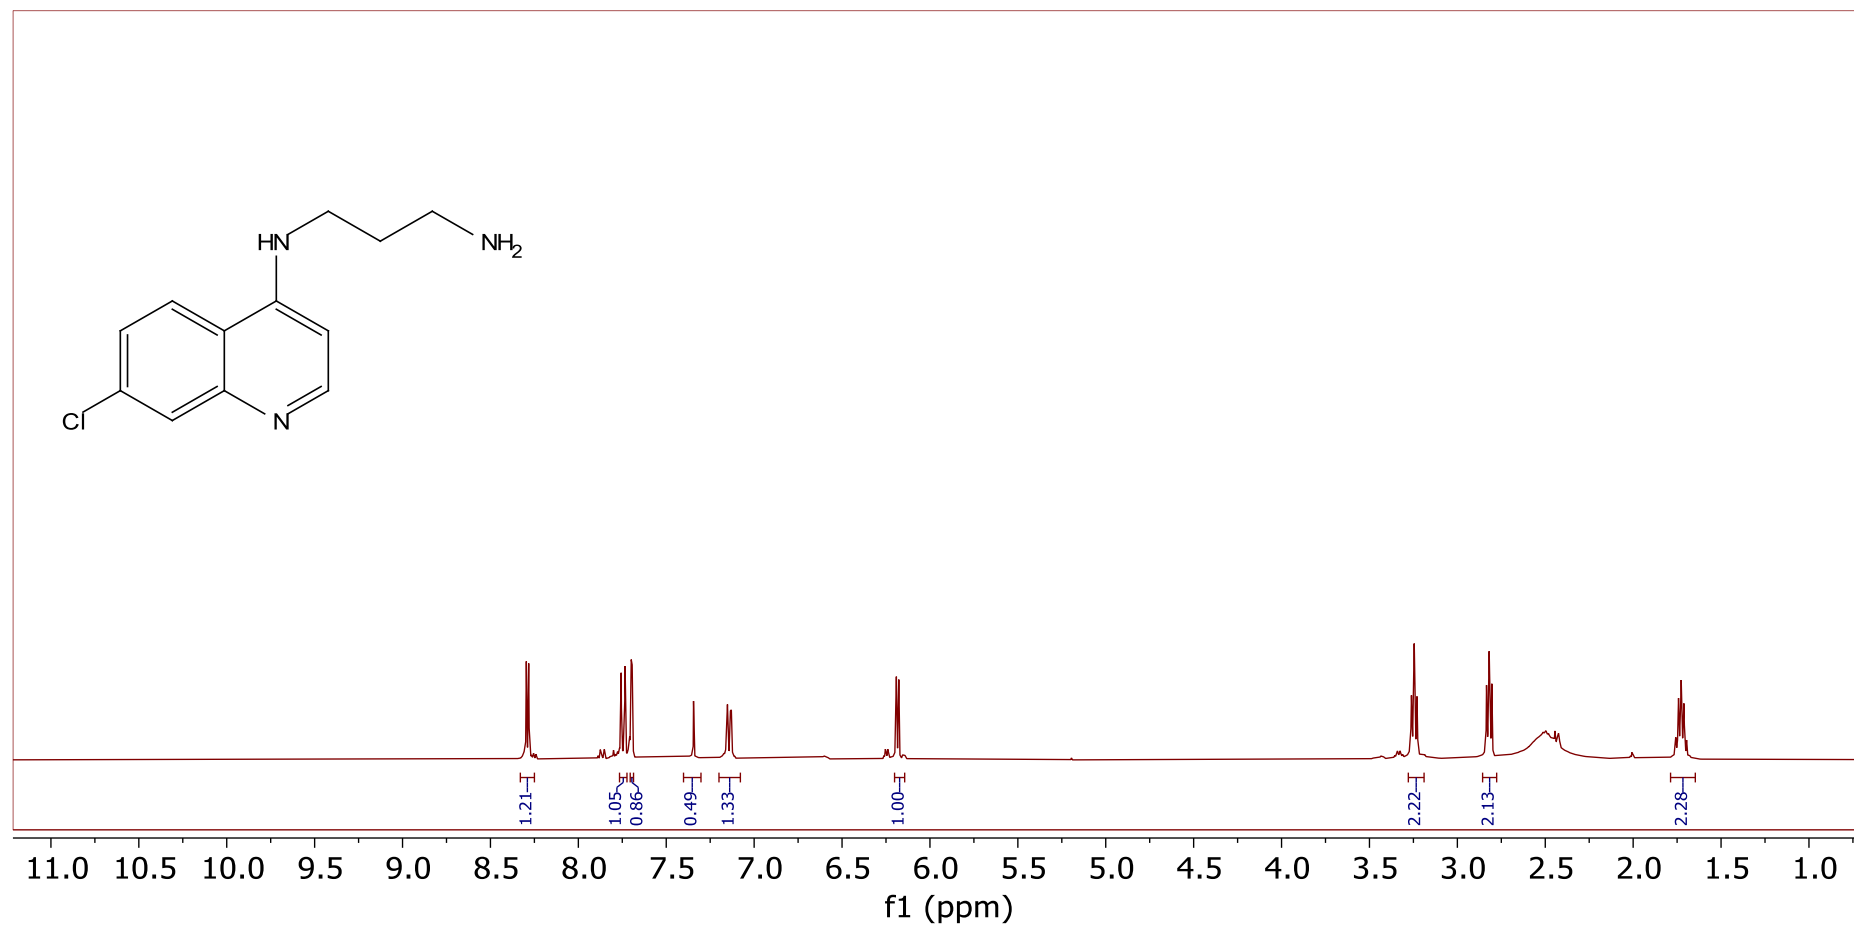

**S3:** <sup>1</sup>H NMR spectrum of N-(7-chloroquinolin-4-yl)propane-1,3-diamine **3**

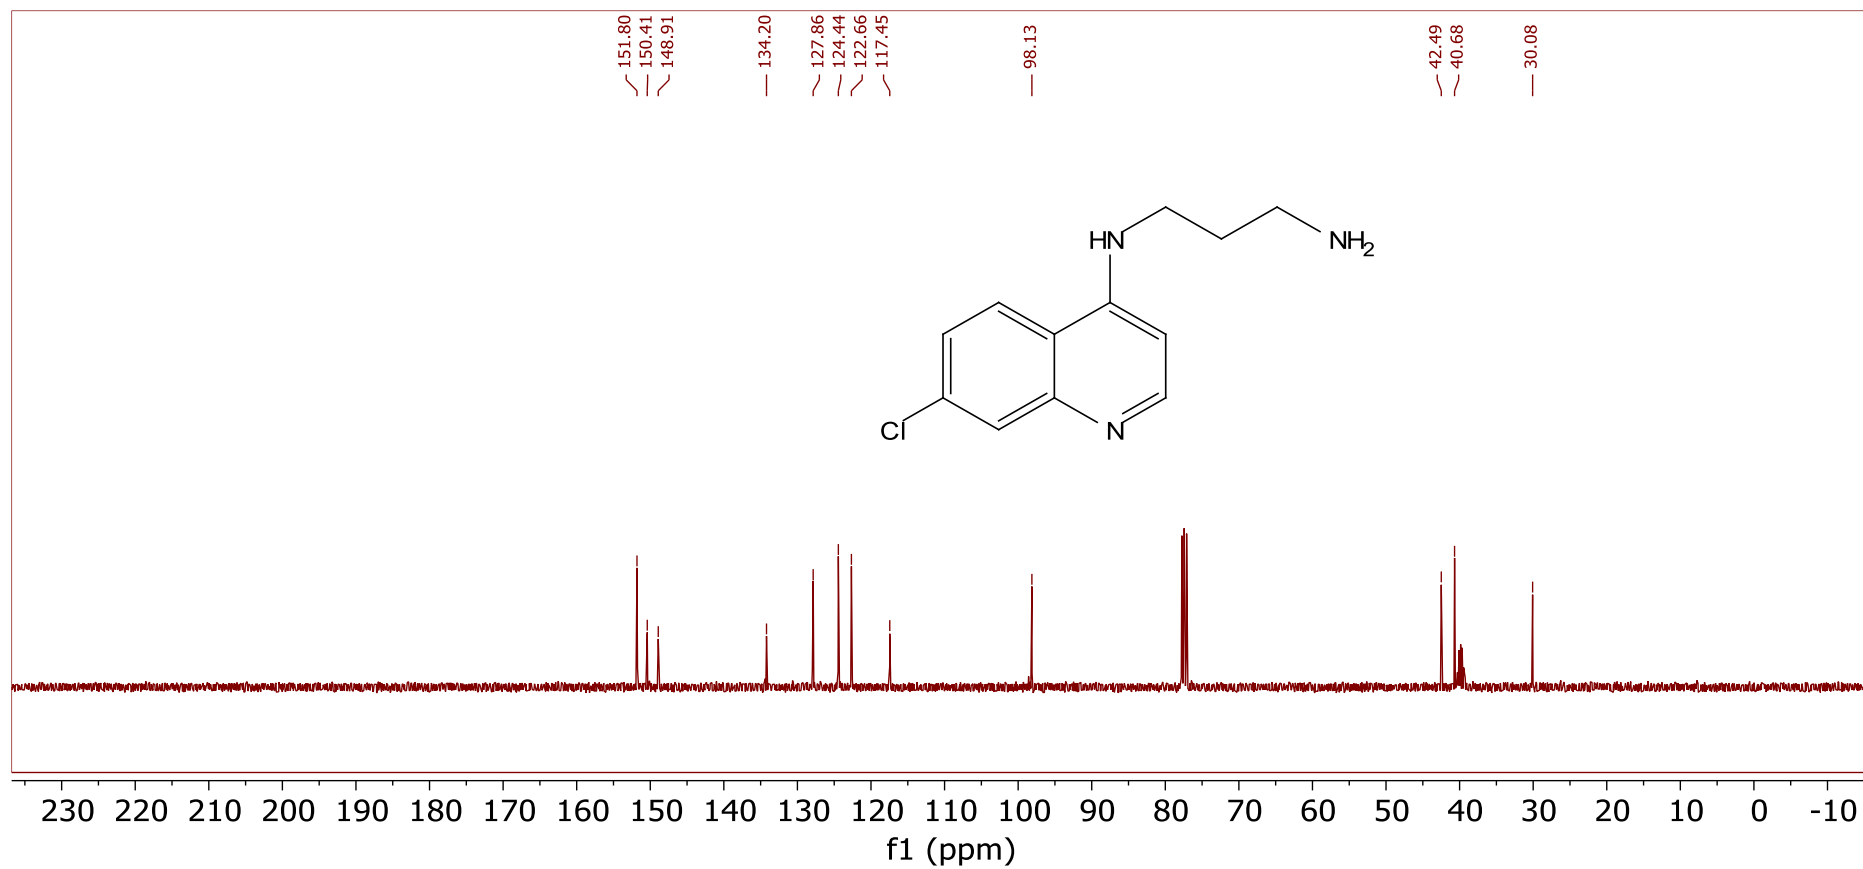

**S4:**  $^{13}\text{C}$  NMR spectrum of N-(7-chloroquinolin-4-yl)propane-1,3-diamine **3**

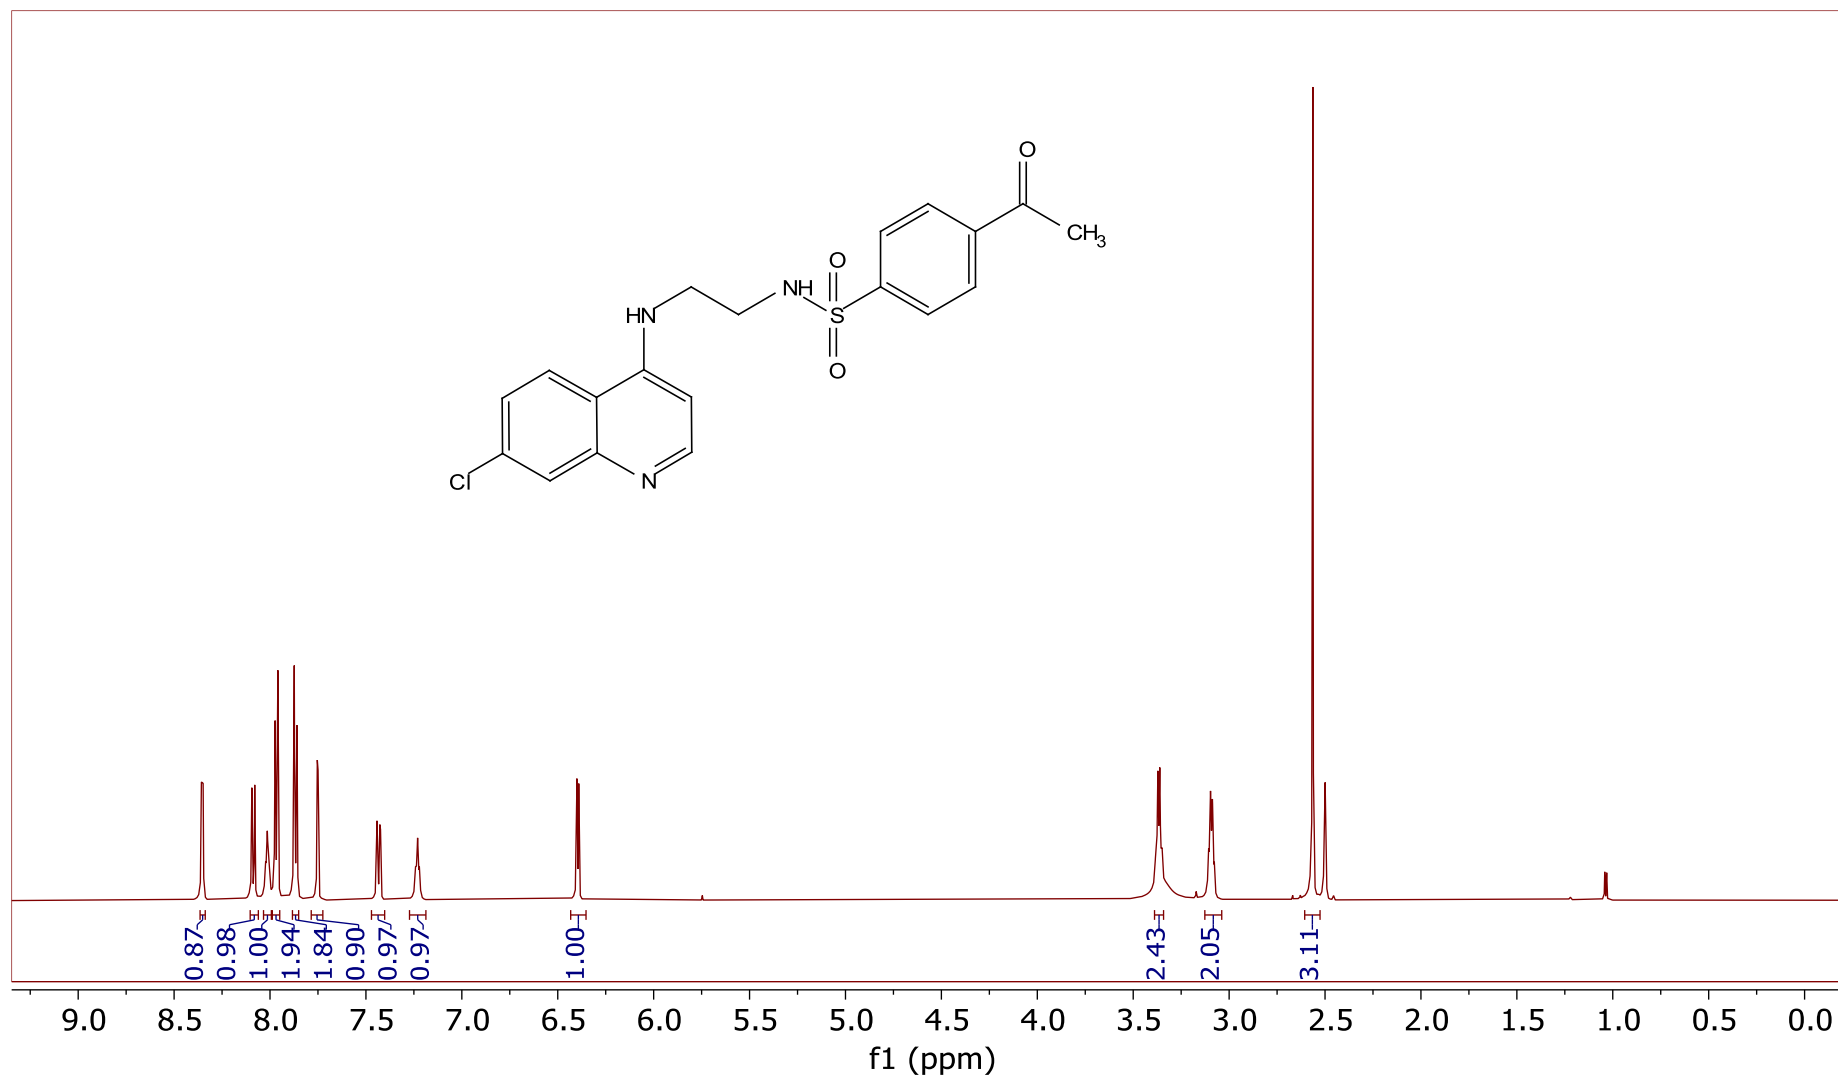

**S5:**  $^1\text{H}$  NMR spectrum of 4-acetyl-N-{2-[(7-chloroquinolin-4-yl)amino]ethyl}benzenesulfonamide **4**

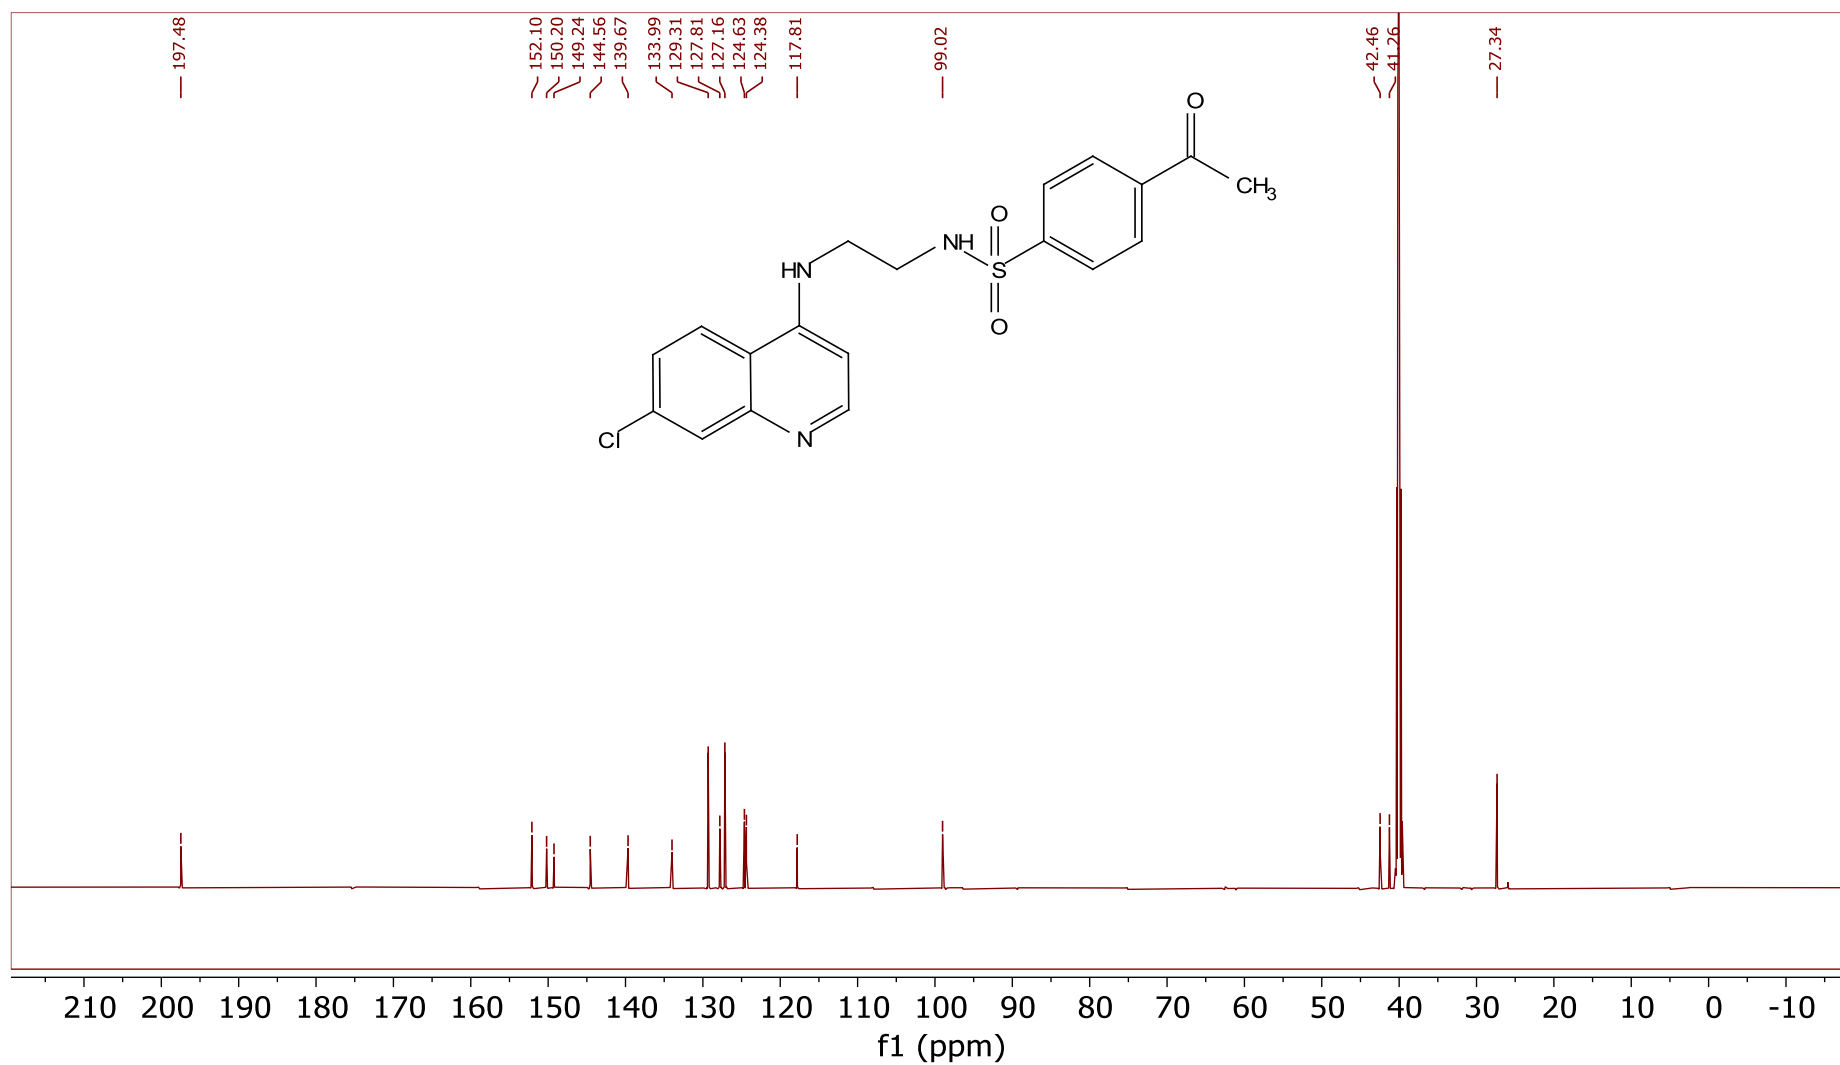

**S6:** <sup>13</sup>C NMR spectrum of 4-acetyl-N-{2-[(7-chloroquinolin-4-yl)amino]ethyl}benzenesulfonamide **4**

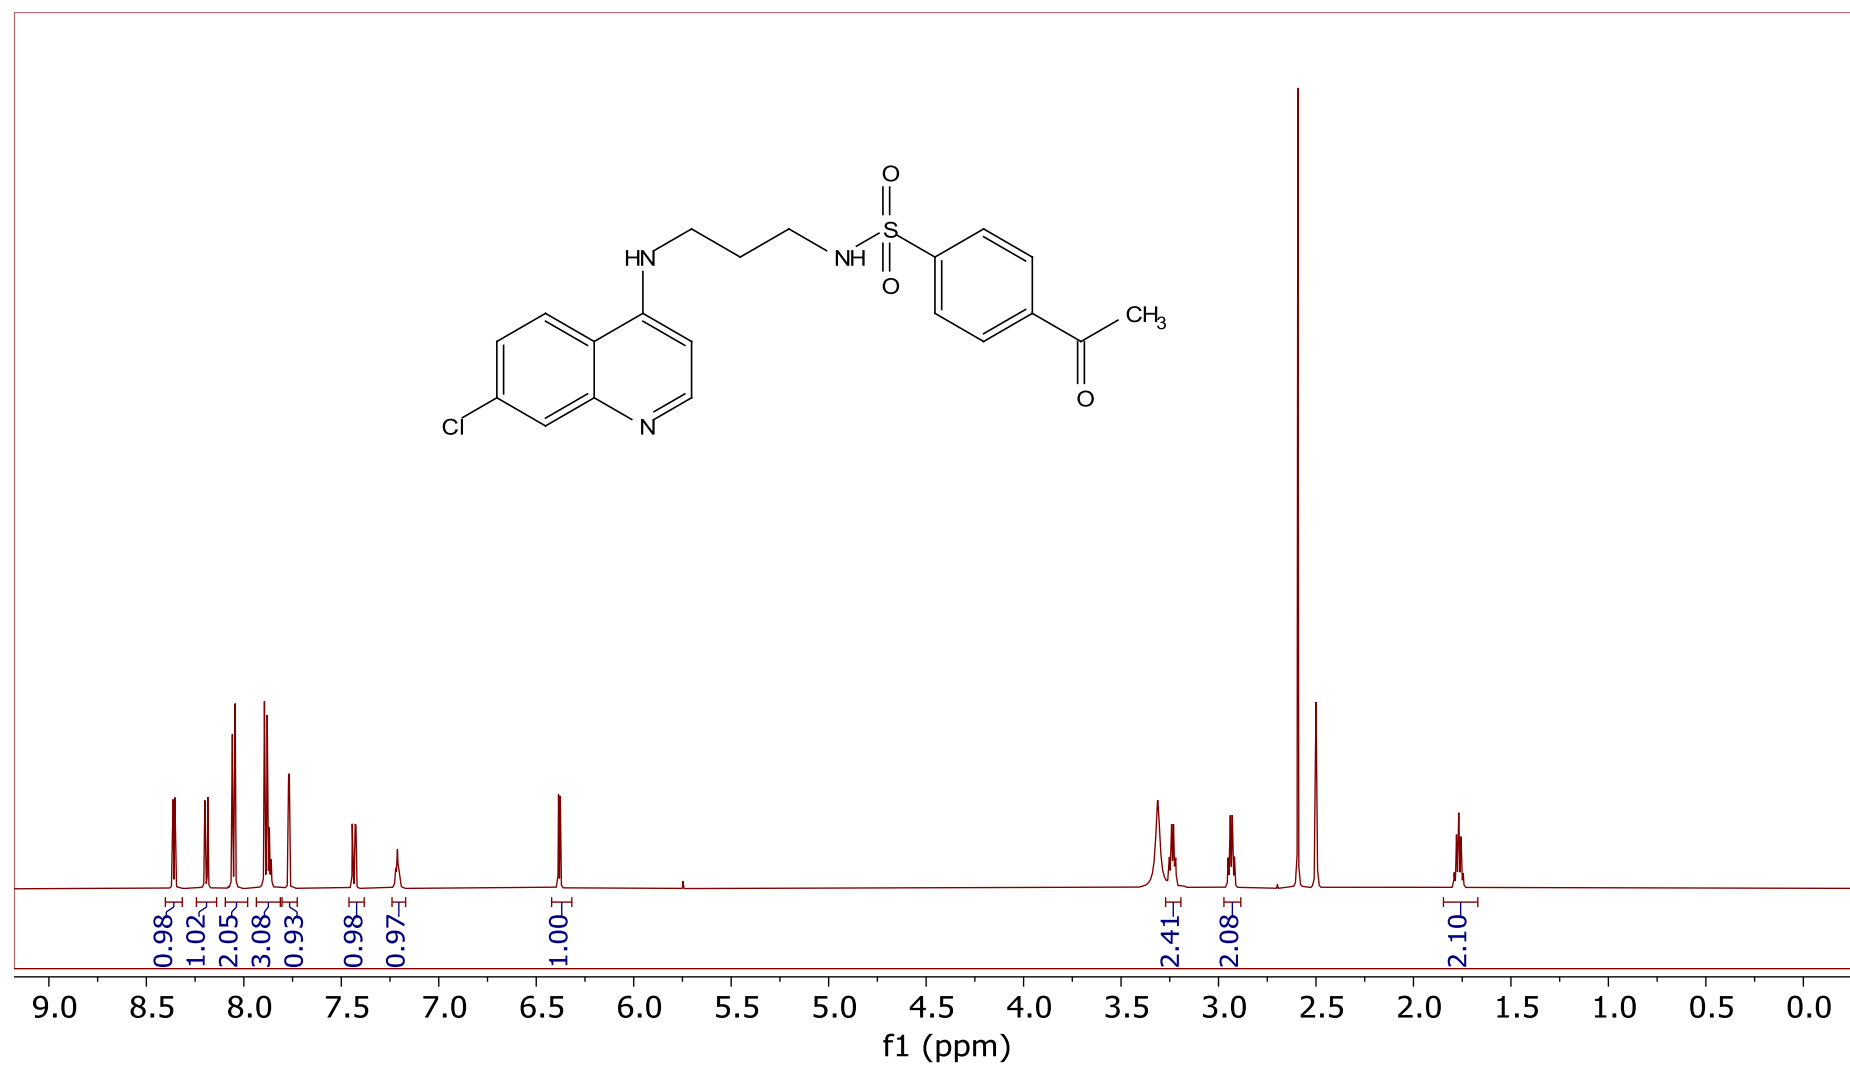

**S7:**  $^1\text{H}$  NMR spectrum of 4-acetyl-N-{3-[(7-chloroquinolin-4-yl)amino]propyl}benzenesulfonamide **5**



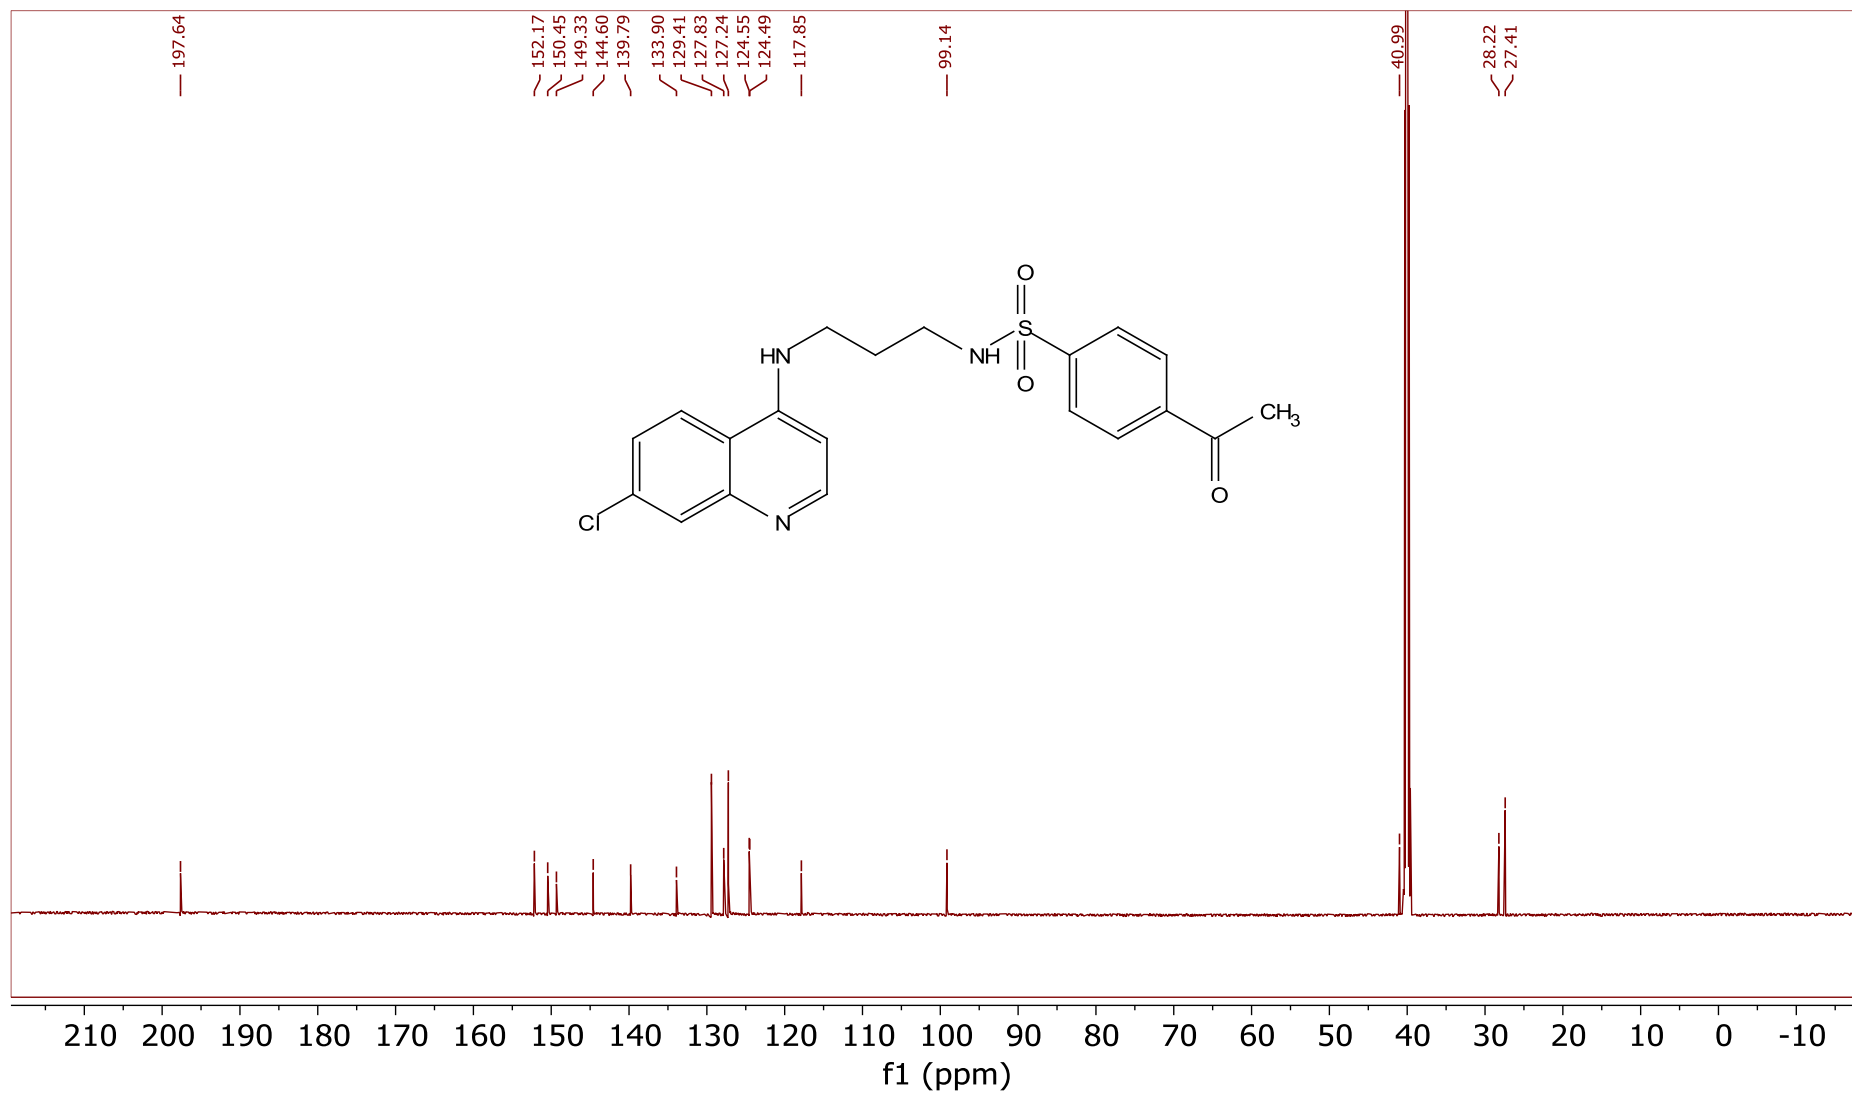

**S8:** <sup>13</sup>C NMR spectrum of 4-acetyl-N-[3-[(7-chloroquinolin-4-yl)amino]propyl]benzenesulfonamide **5**

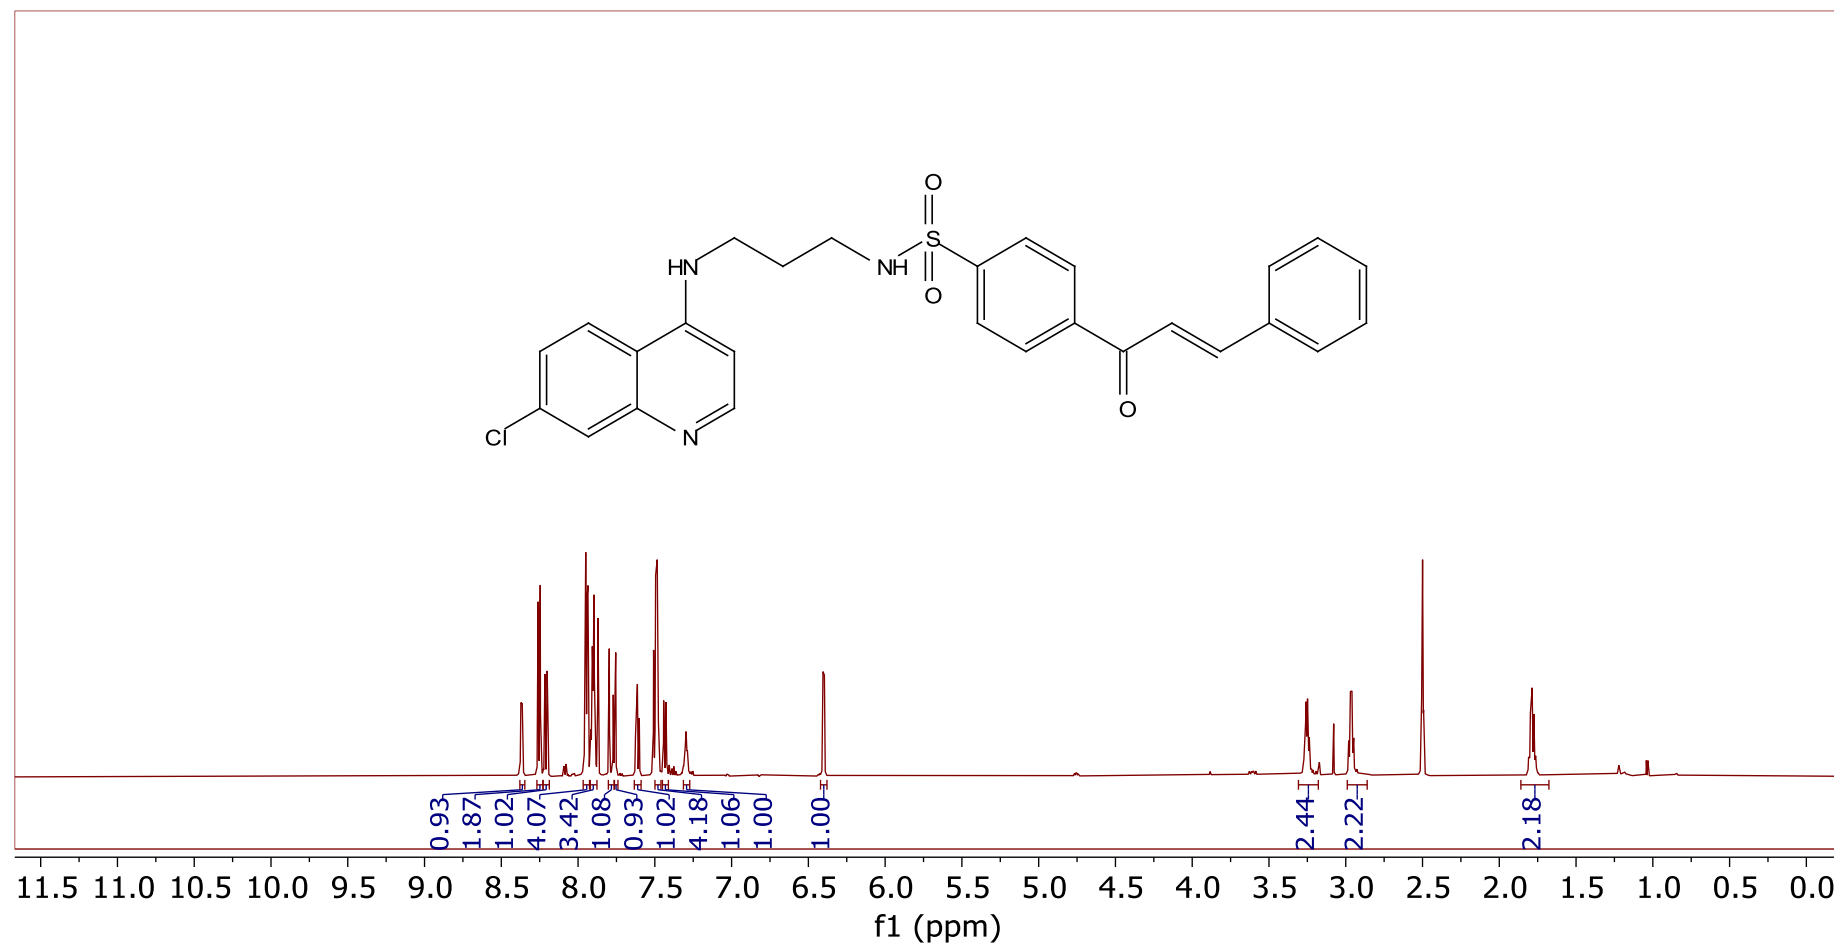

**S9:** <sup>1</sup>H NMR spectrum of *N*-(3-((7-chloroquinolin-4-yl)amino)propyl)-4-cinnamoylbenzenesulfonamide **6**

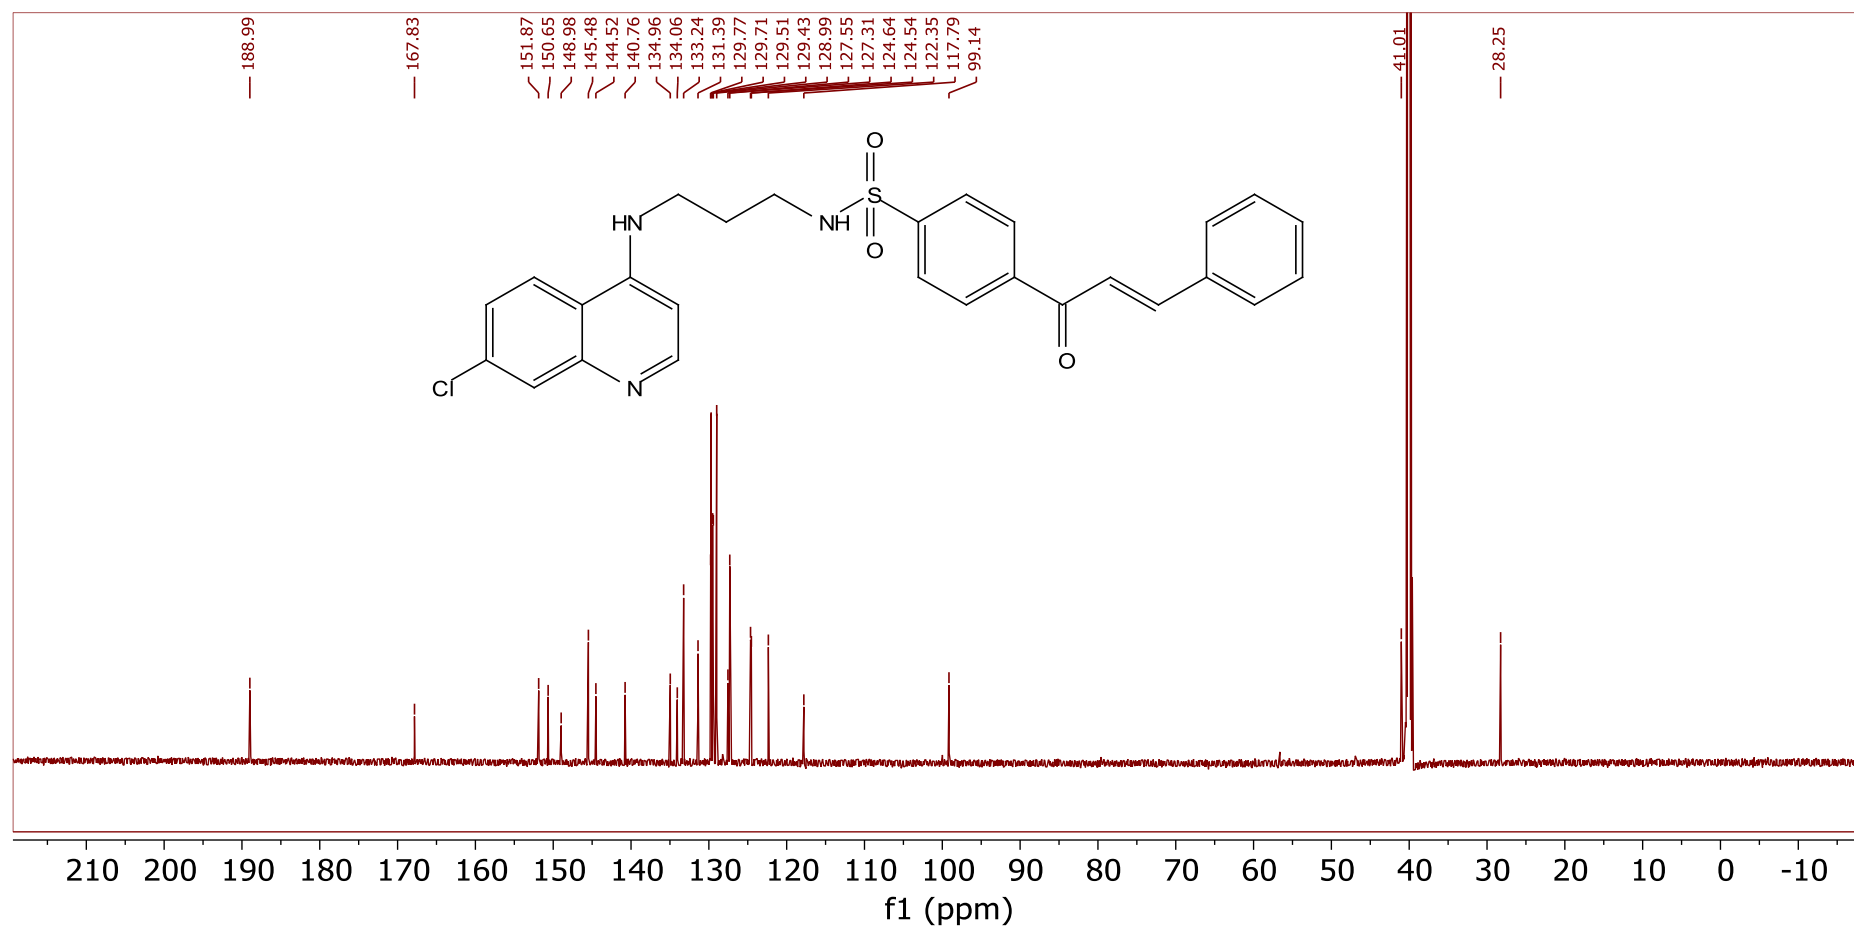

**S10:** <sup>13</sup>C NMR spectrum of N-(3-((7-chloroquinolin-4-yl)amino)propyl)-4-cinnamoylbenzenesulfonamide **6**

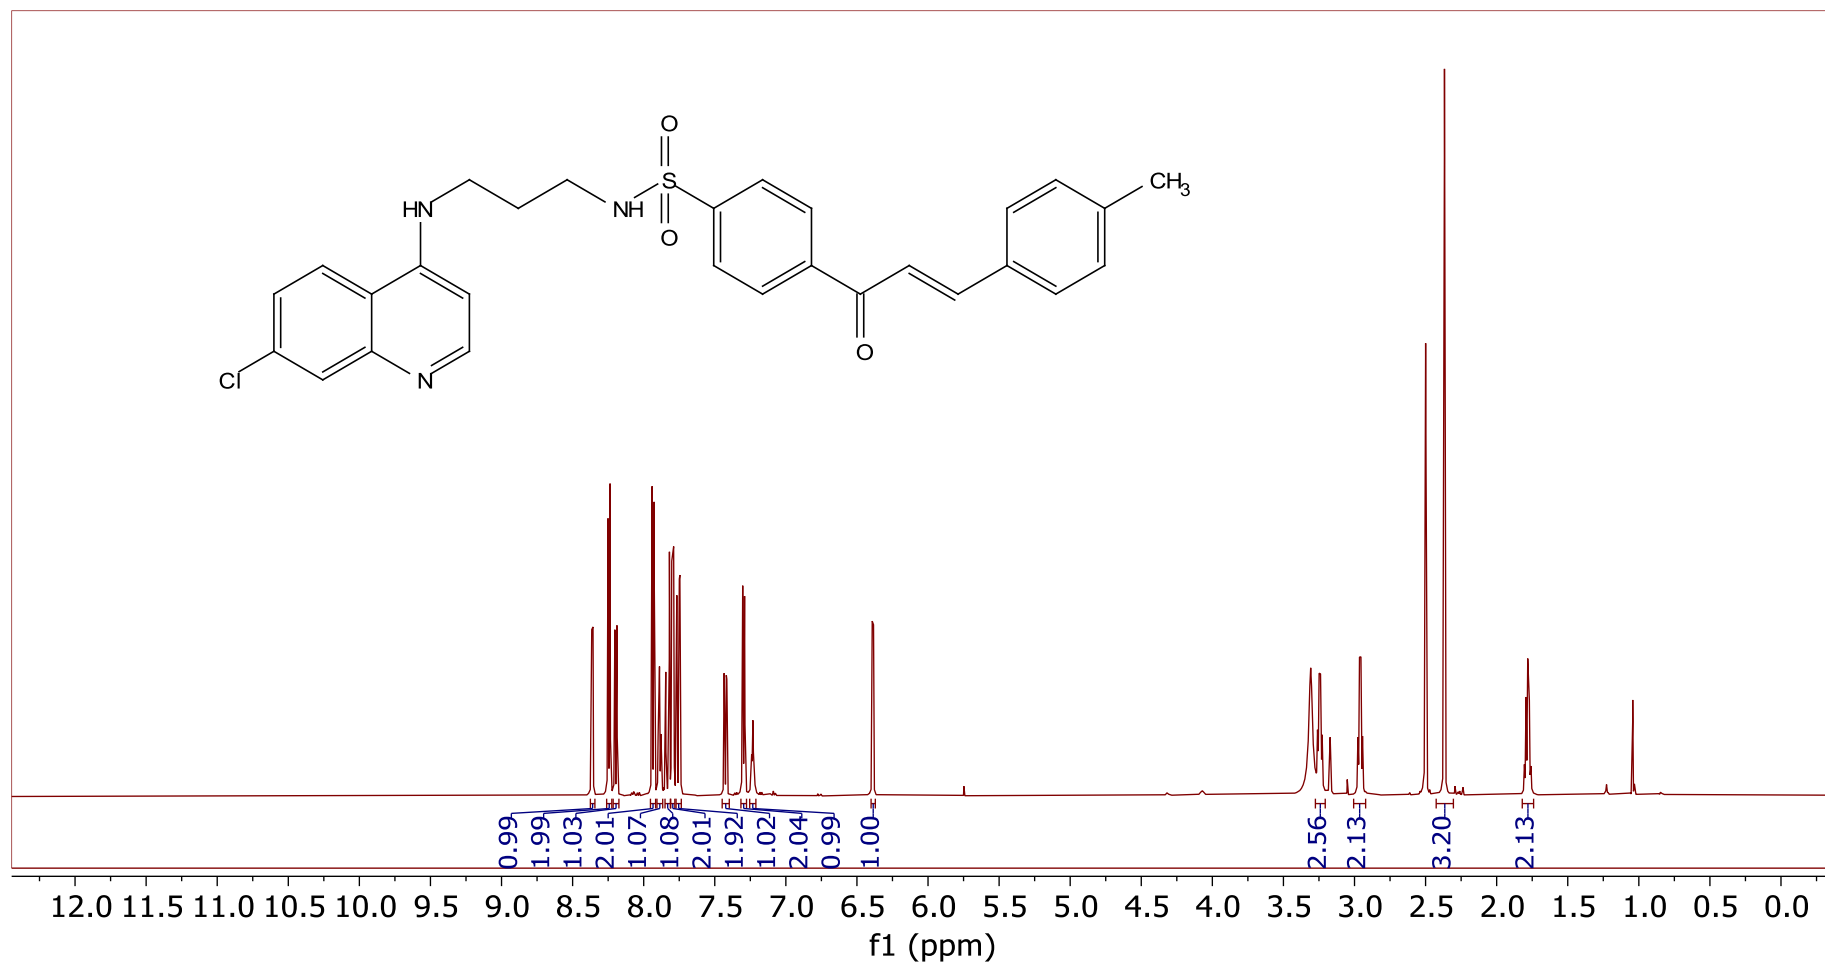

**S11:** <sup>1</sup>H NMR spectrum of (E)-N-(3-((7-Chloroquinolin-4-yl)amino)propyl)-4-(3-(p-tolyl)acryloyl)benzenesulfonamide **7**

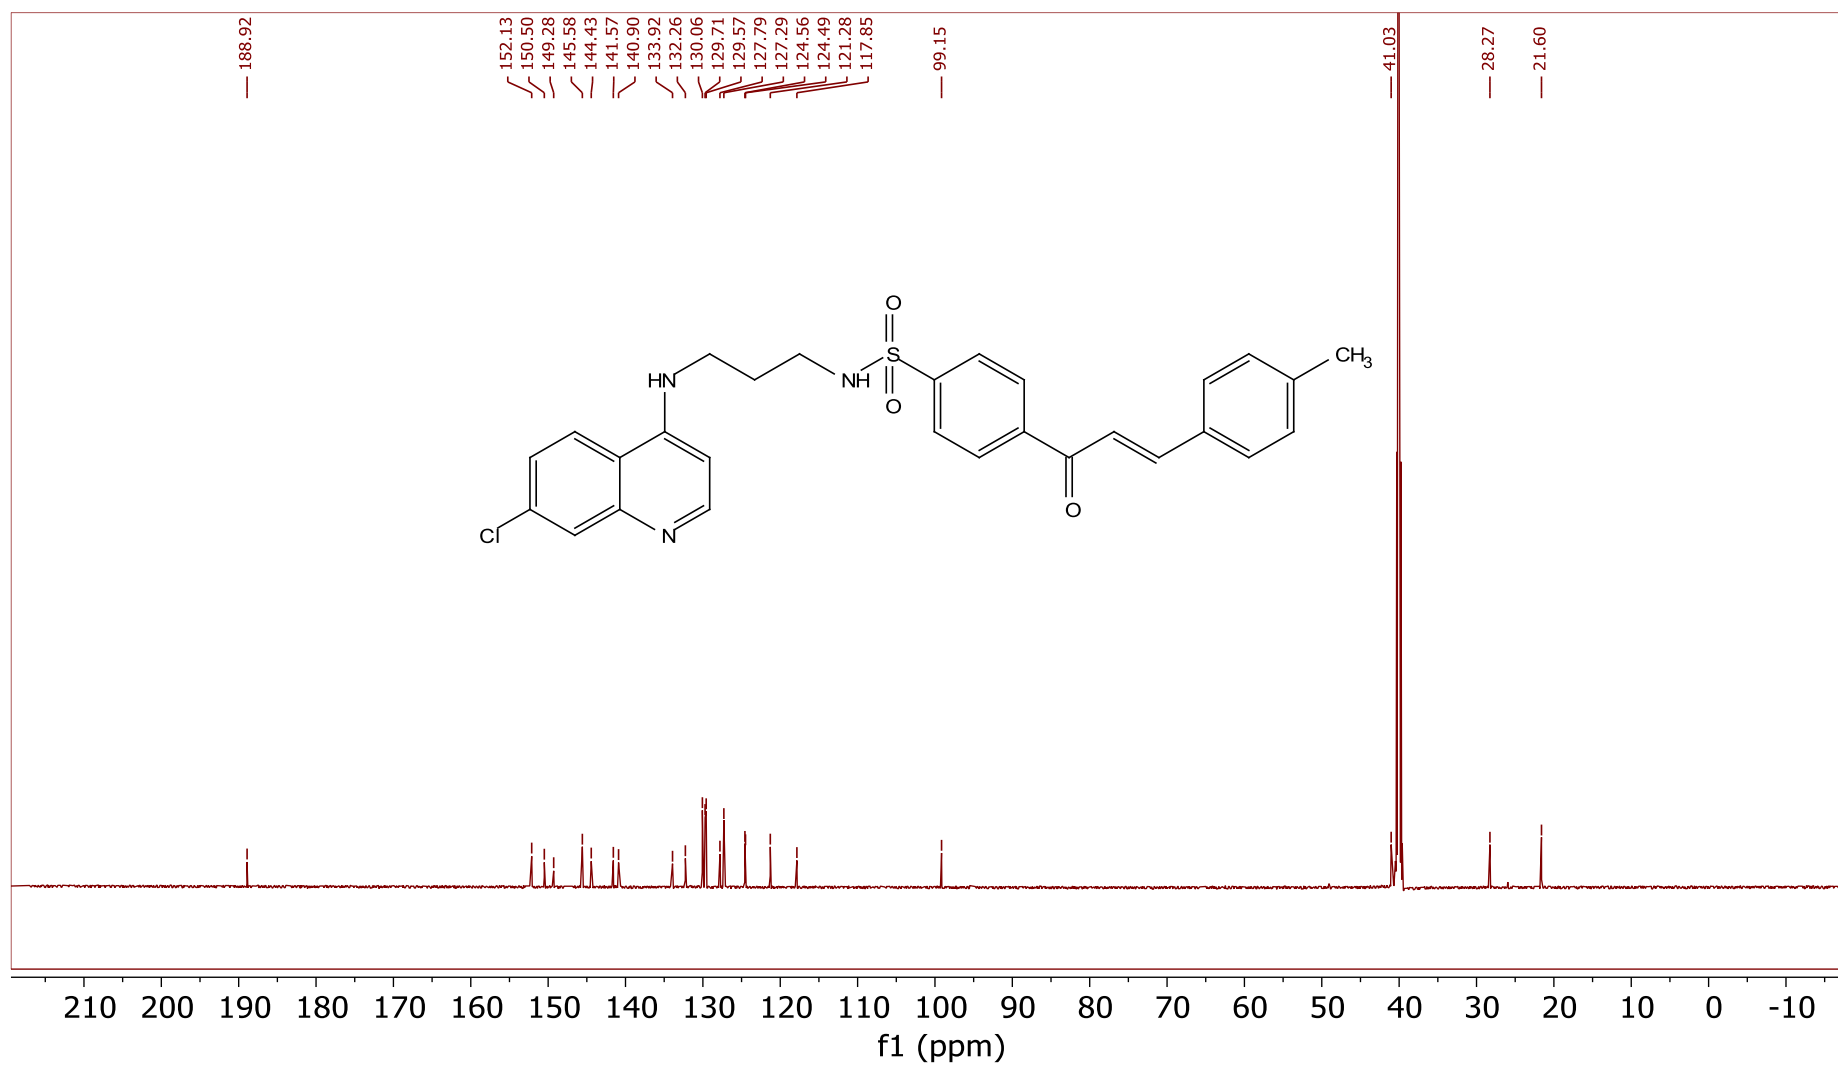

**S12:** <sup>13</sup>C NMR spectrum of (E)-N-(3-((7-Chloroquinolin-4-yl)amino)propyl)-4-(3-(p-tolyl)acryloyl)benzenesulfonamide **7**

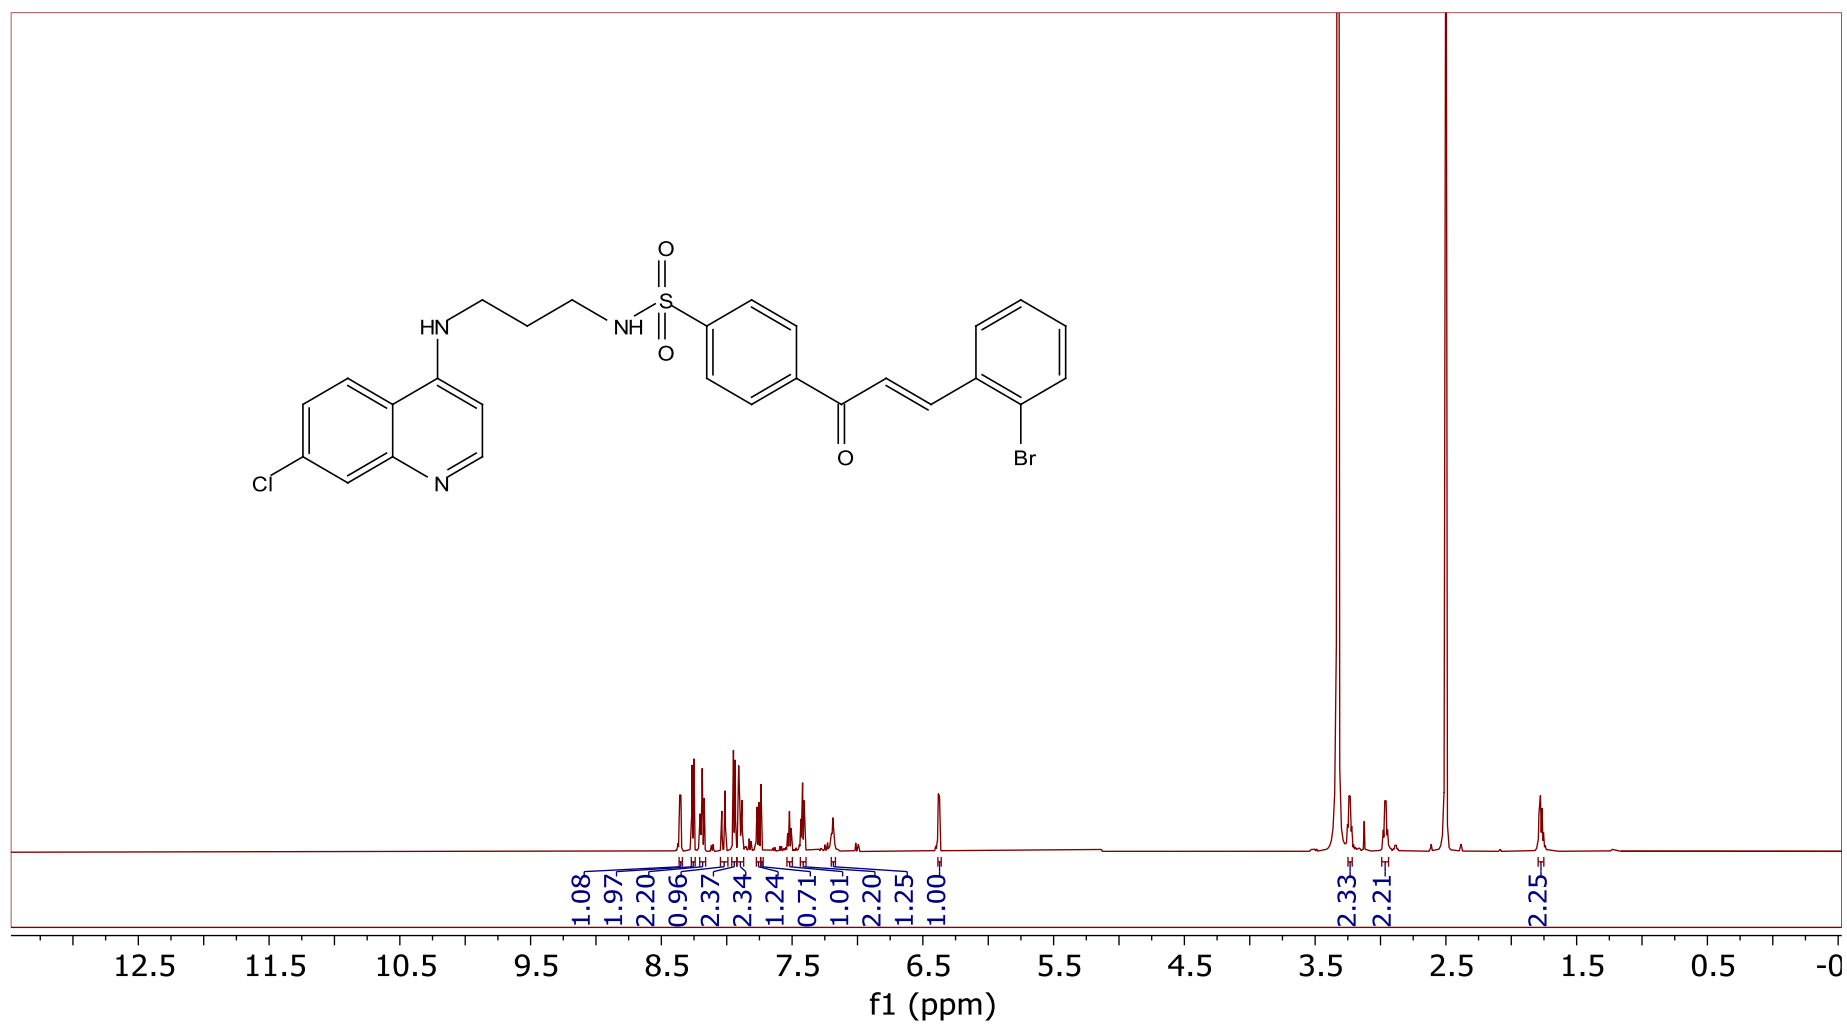

**S13:** <sup>1</sup>H NMR (*E*)-4-(3-(2-Bromophenyl)acryloyl)-*N*-(3-((7-chloroquinolin-4-yl)amino)propyl)benzenesulfonamide **8**

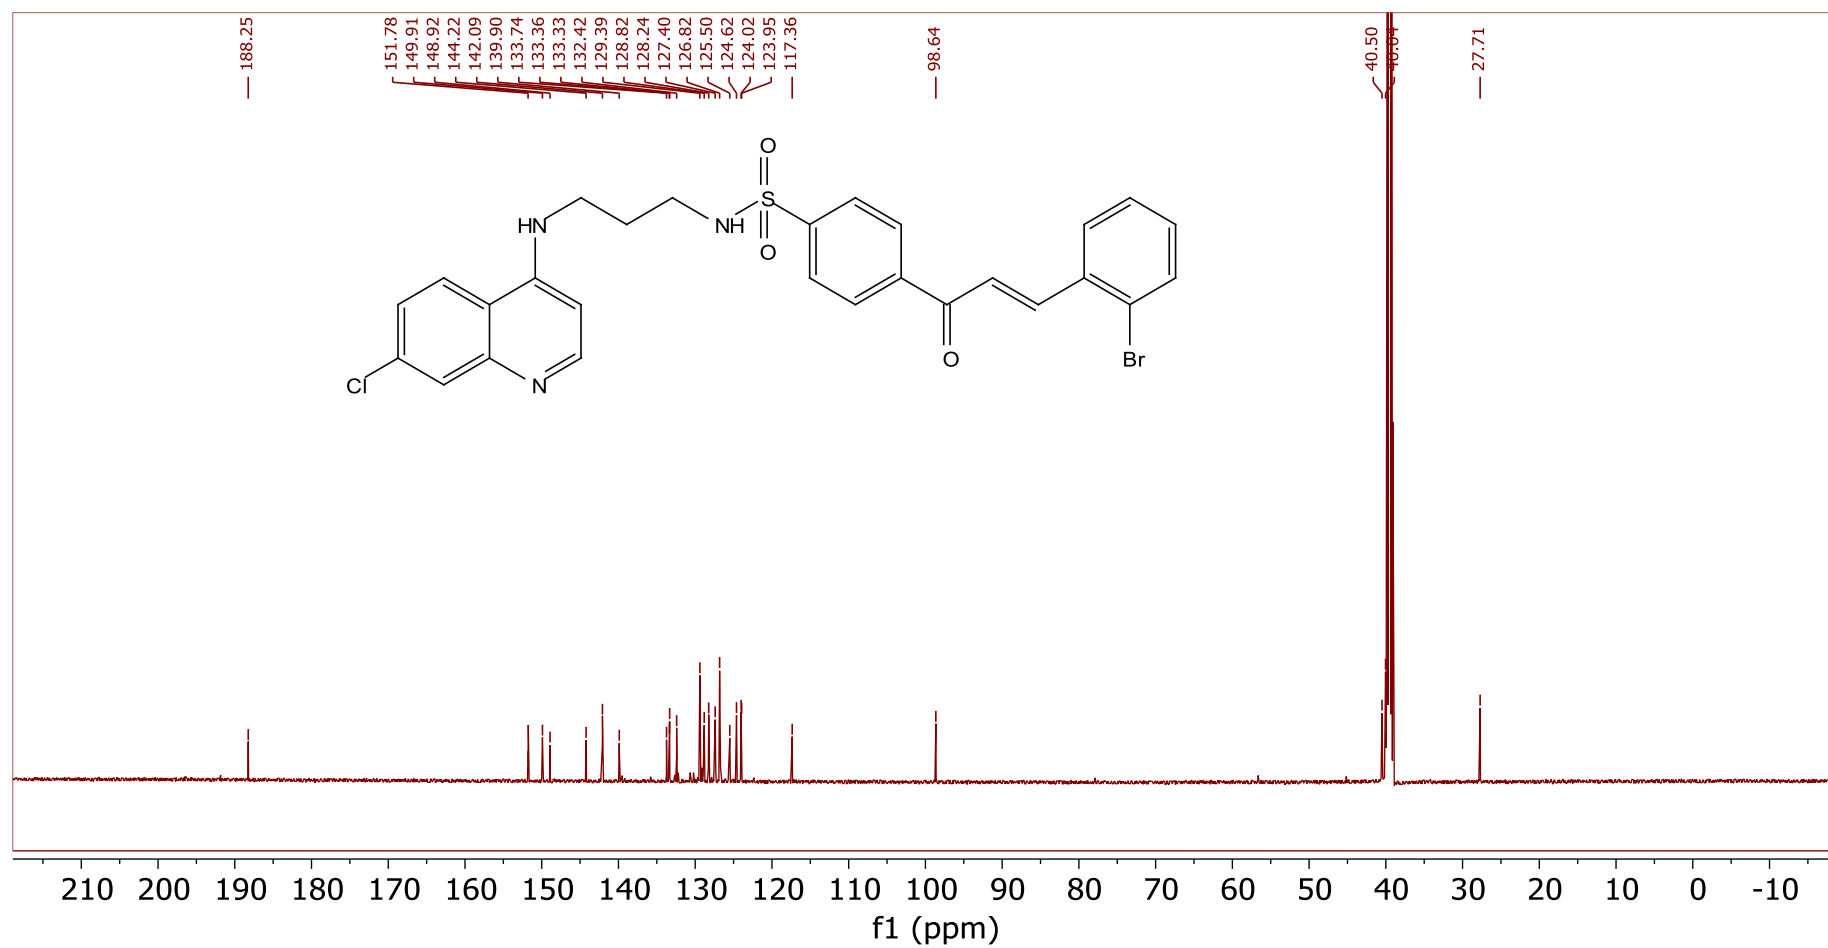

**S14:** <sup>13</sup>C NMR (*E*)-4-(3-(2-Bromophenyl)acryloyl)-*N*-(3-((7-chloroquinolin-4-yl)amino)propyl)benzenesulfonamide **8**

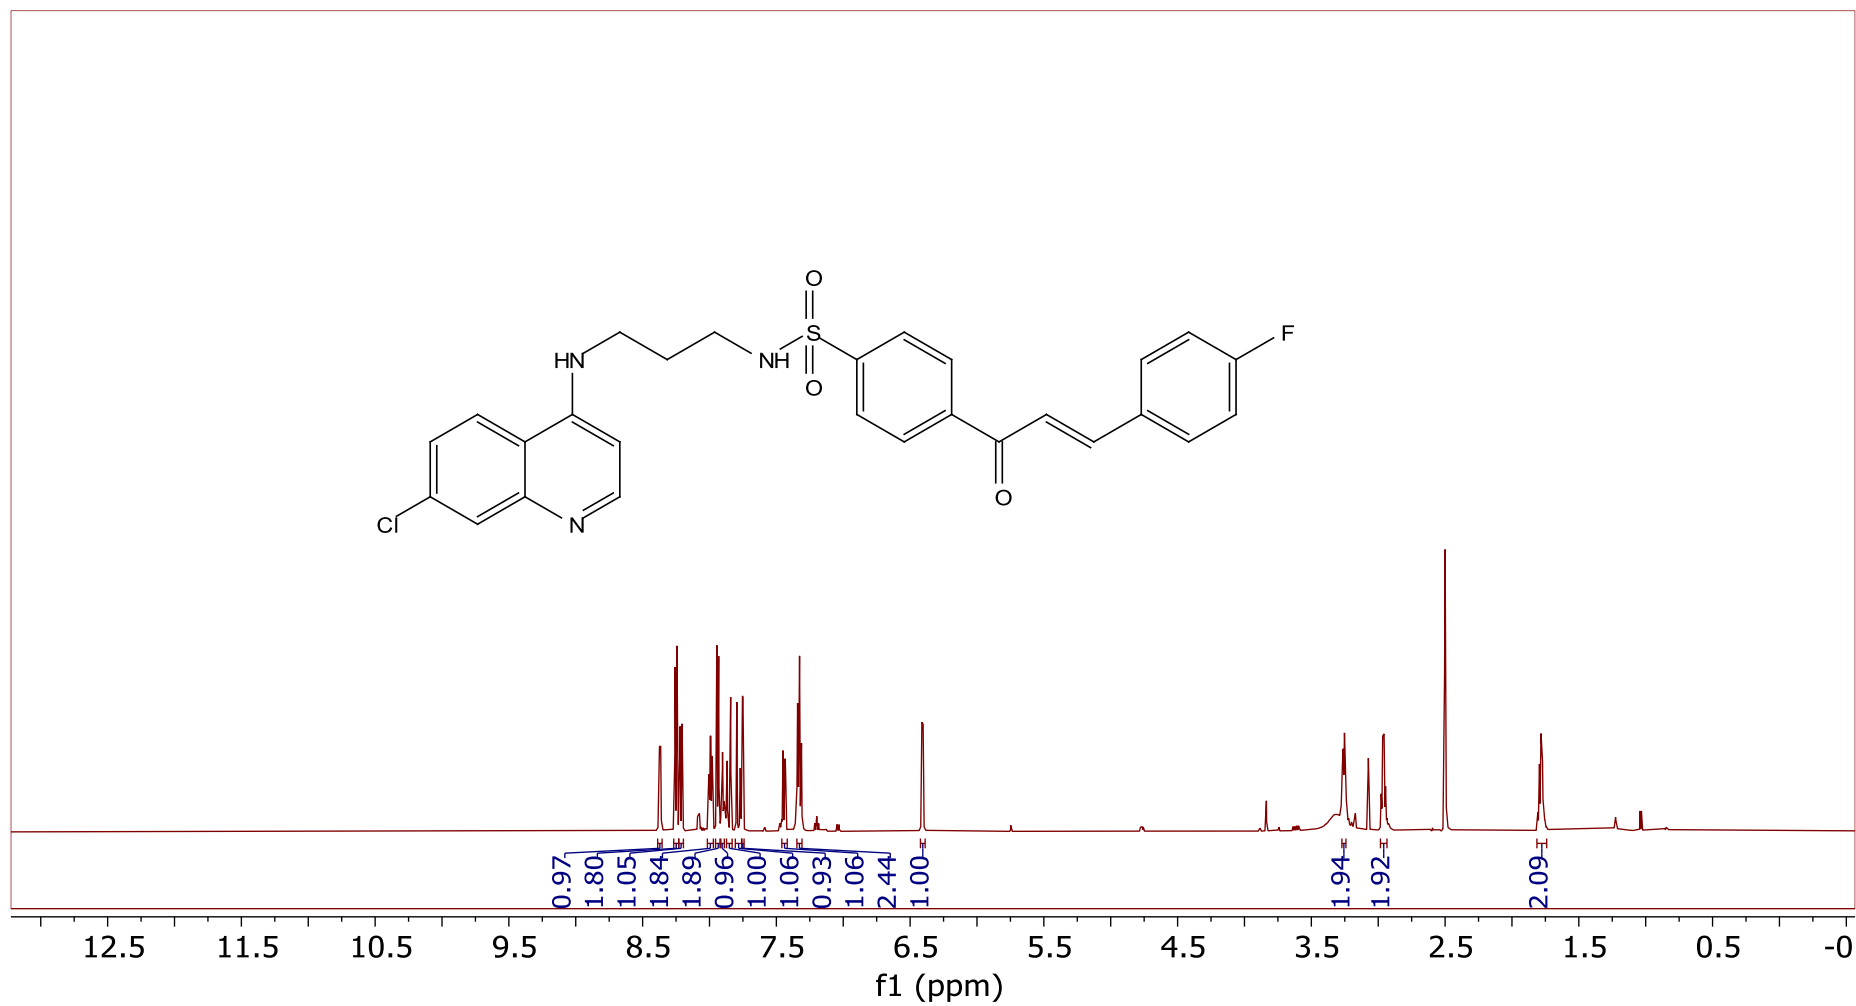

**S15:** <sup>1</sup>H NMR spectrum of (E)-N-(3-((7-Chloroquinolin-4-yl)amino)propyl)-4-(3-(4-fluorophenyl)acryloyl)benzenesulfonamide **9**



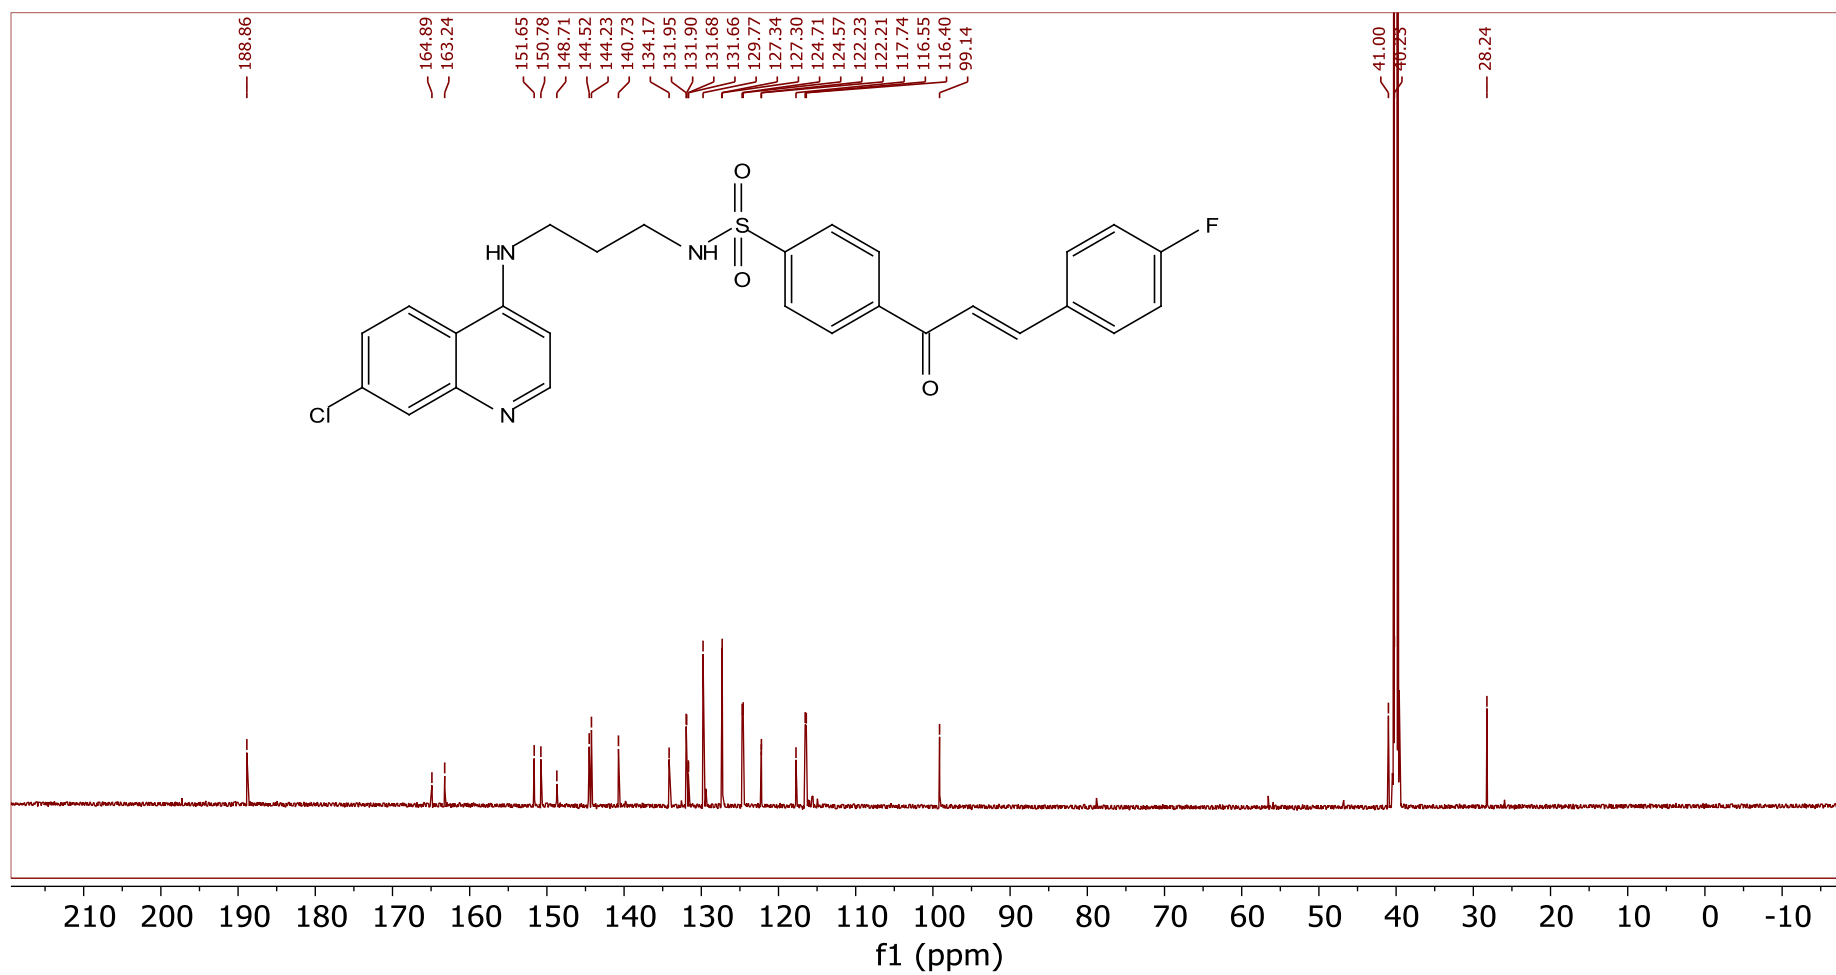

**S16:**  $^{13}\text{C}$  NMR spectrum of *(E)*-*N*-(3-((7-chloroquinolin-4-yl)amino)propyl)-4-(3-(4-fluorophenyl)acryloyl)benzenesulfonamide **9**

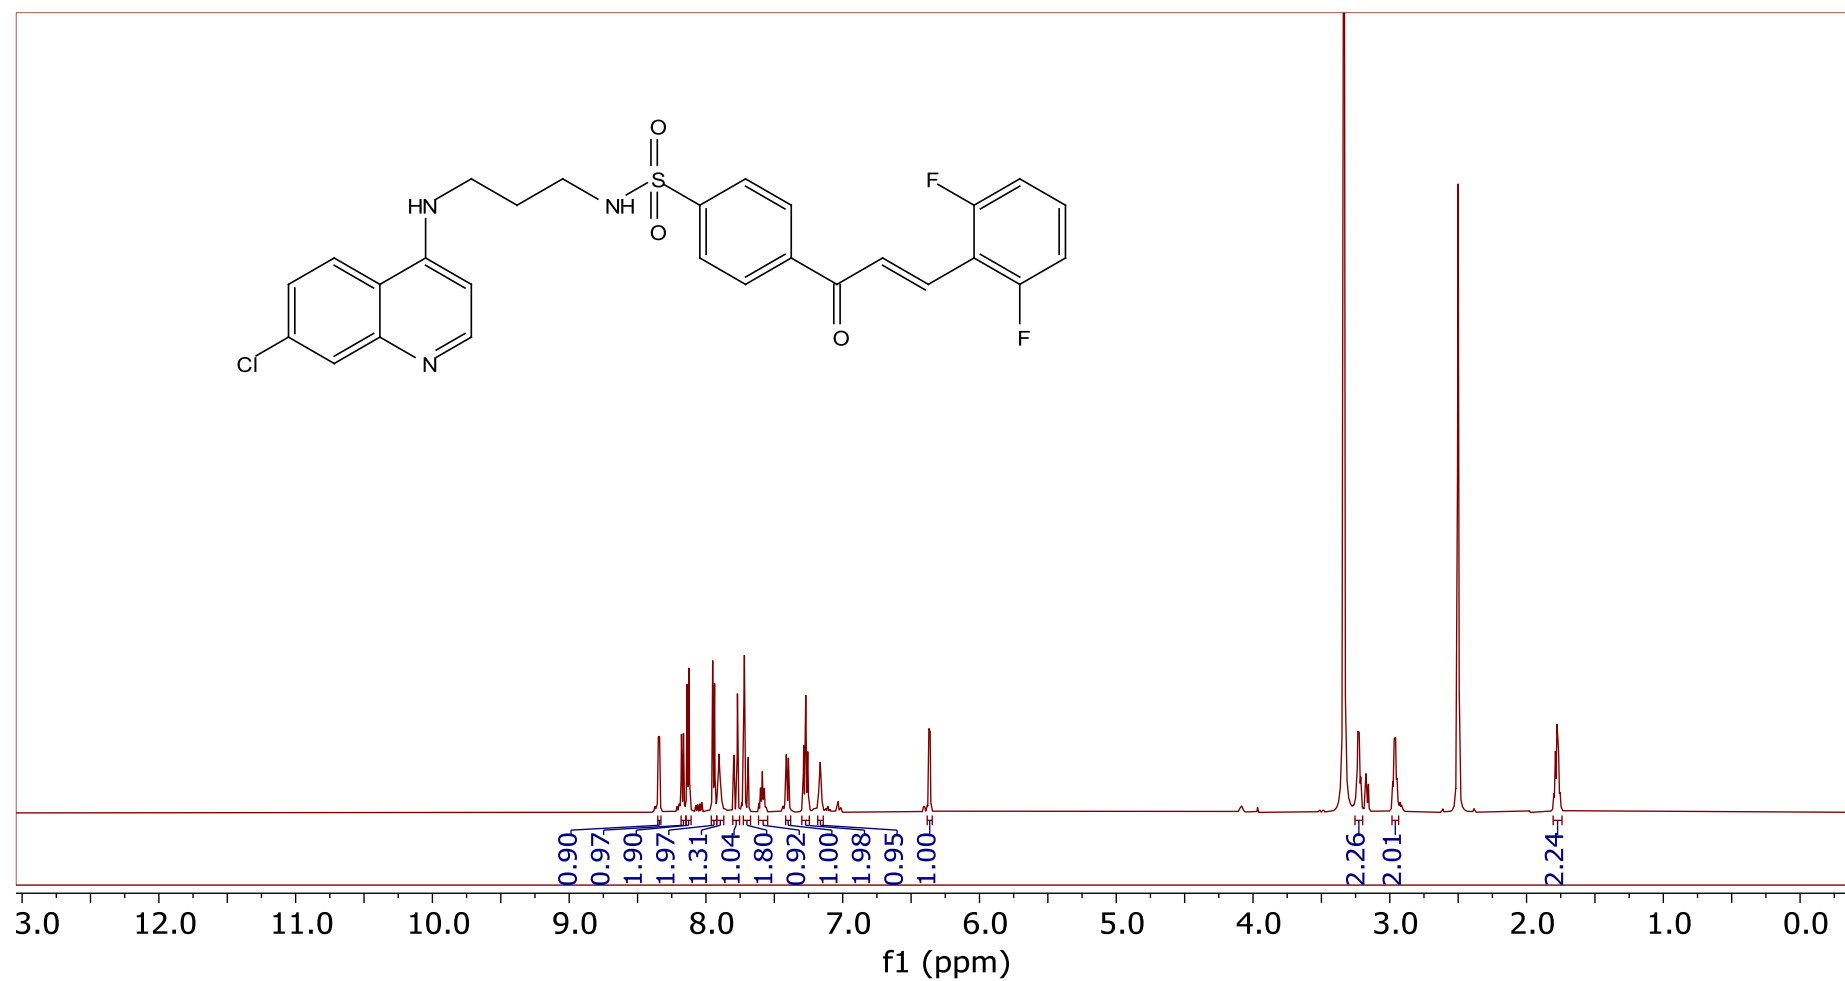

**S17:** <sup>1</sup>H NMR spectrum of (E)-N-(3-((7-chloroquinolin-4-yl)amino)propyl)-4-(3-(2,6-difluorophenyl)acryloyl)benzenesulfonamide **10**

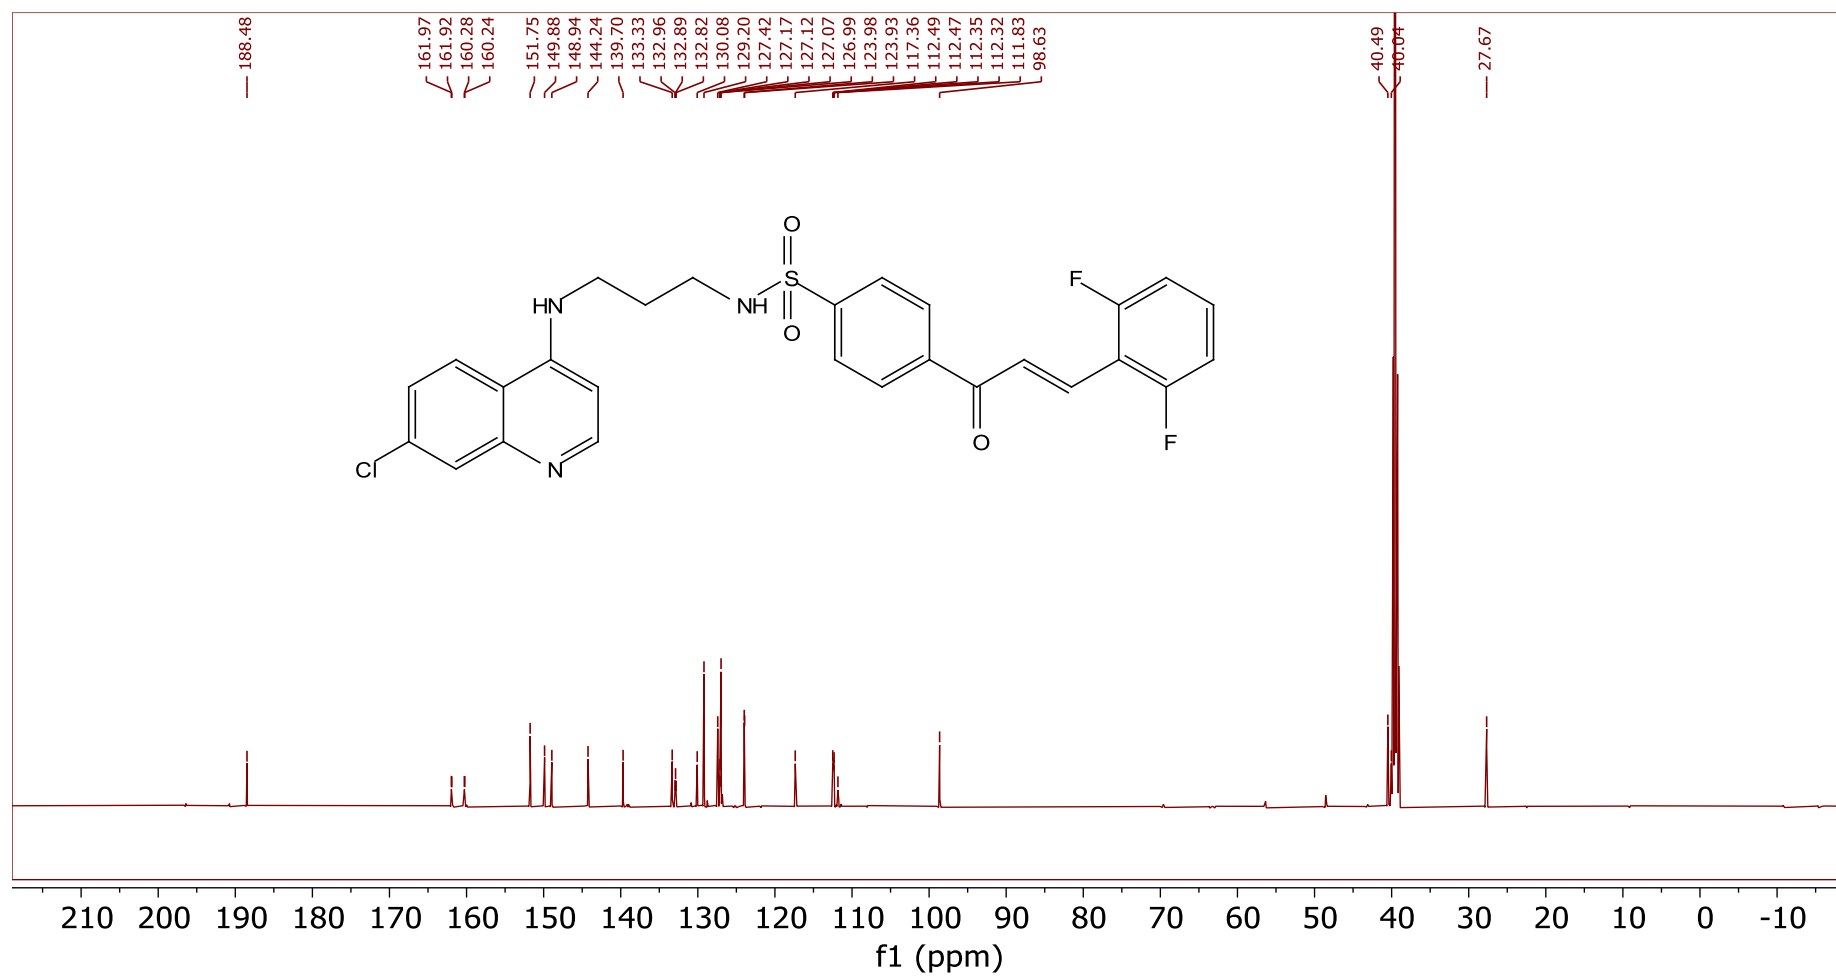

**S18:** <sup>13</sup>C NMR spectrum of (E)-N-(3-((7-Chloroquinolin-4-yl)amino)propyl)-4-(3-(2,6-difluorophenyl)acryloyl)benzenesulfonamide **10**

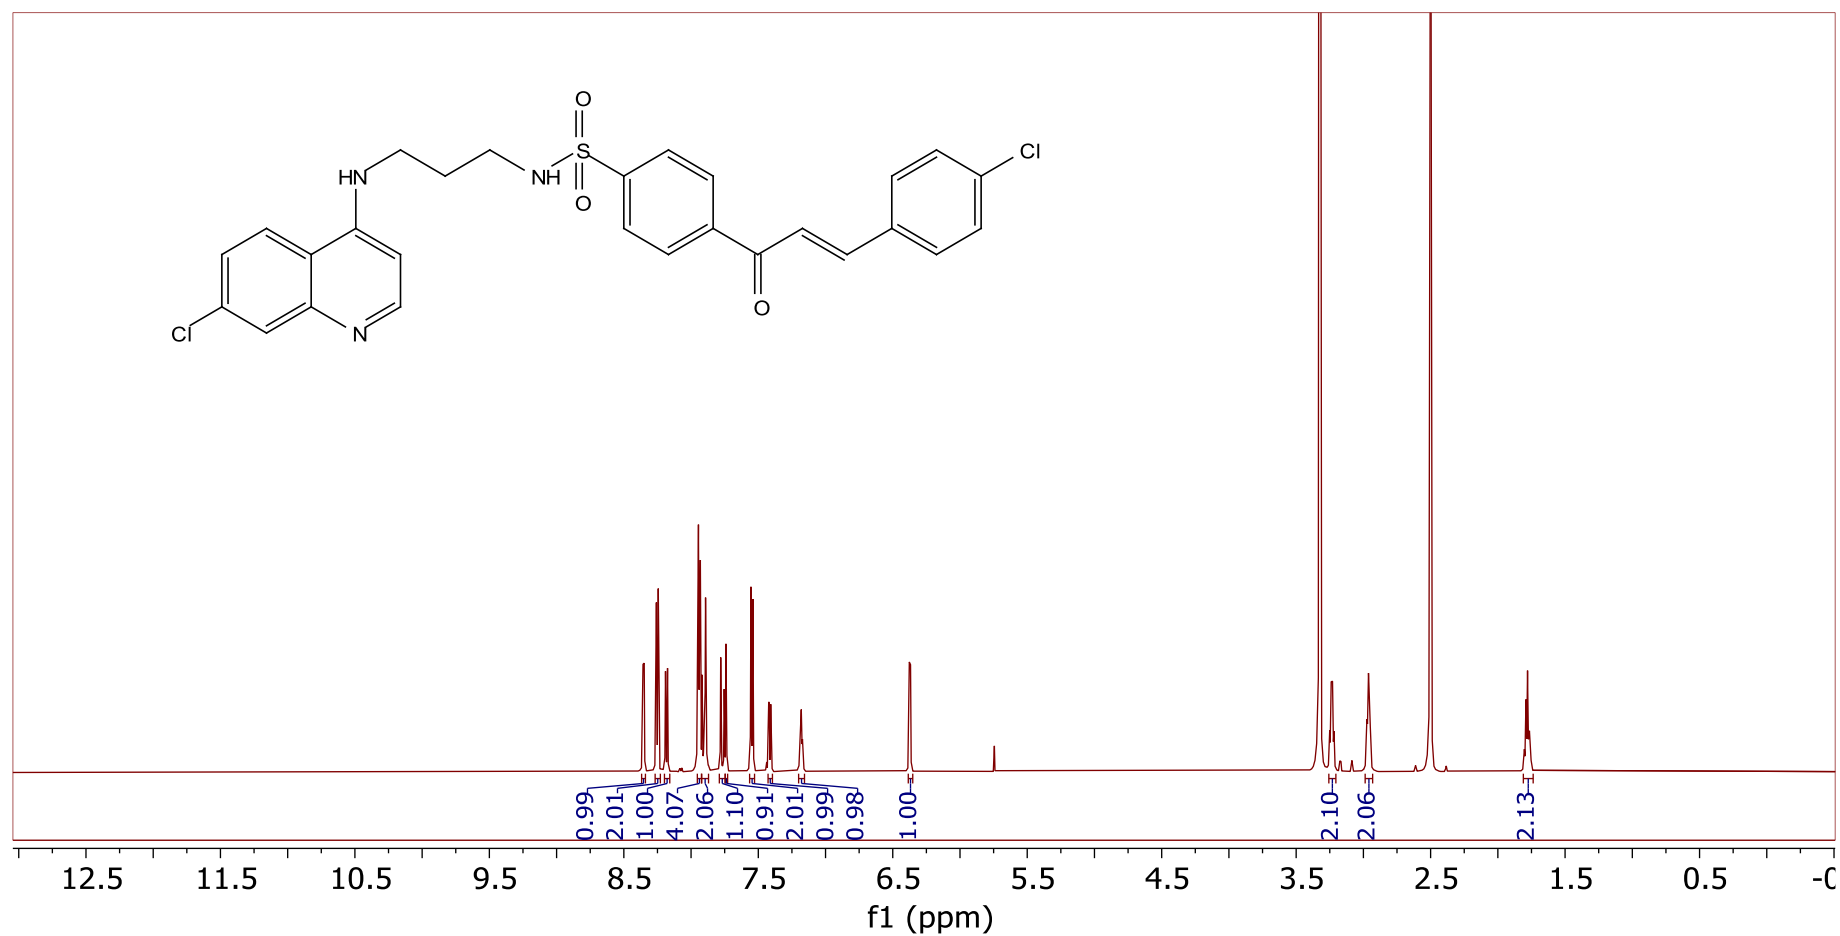

**S19:** <sup>1</sup>H NMR spectrum of *(E)*-4-(3-(4-Chlorophenyl)acryloyl)-*N*-(3-((7-chloroquinolin-4-yl)amino)propyl)benzenesulfonamide **11**

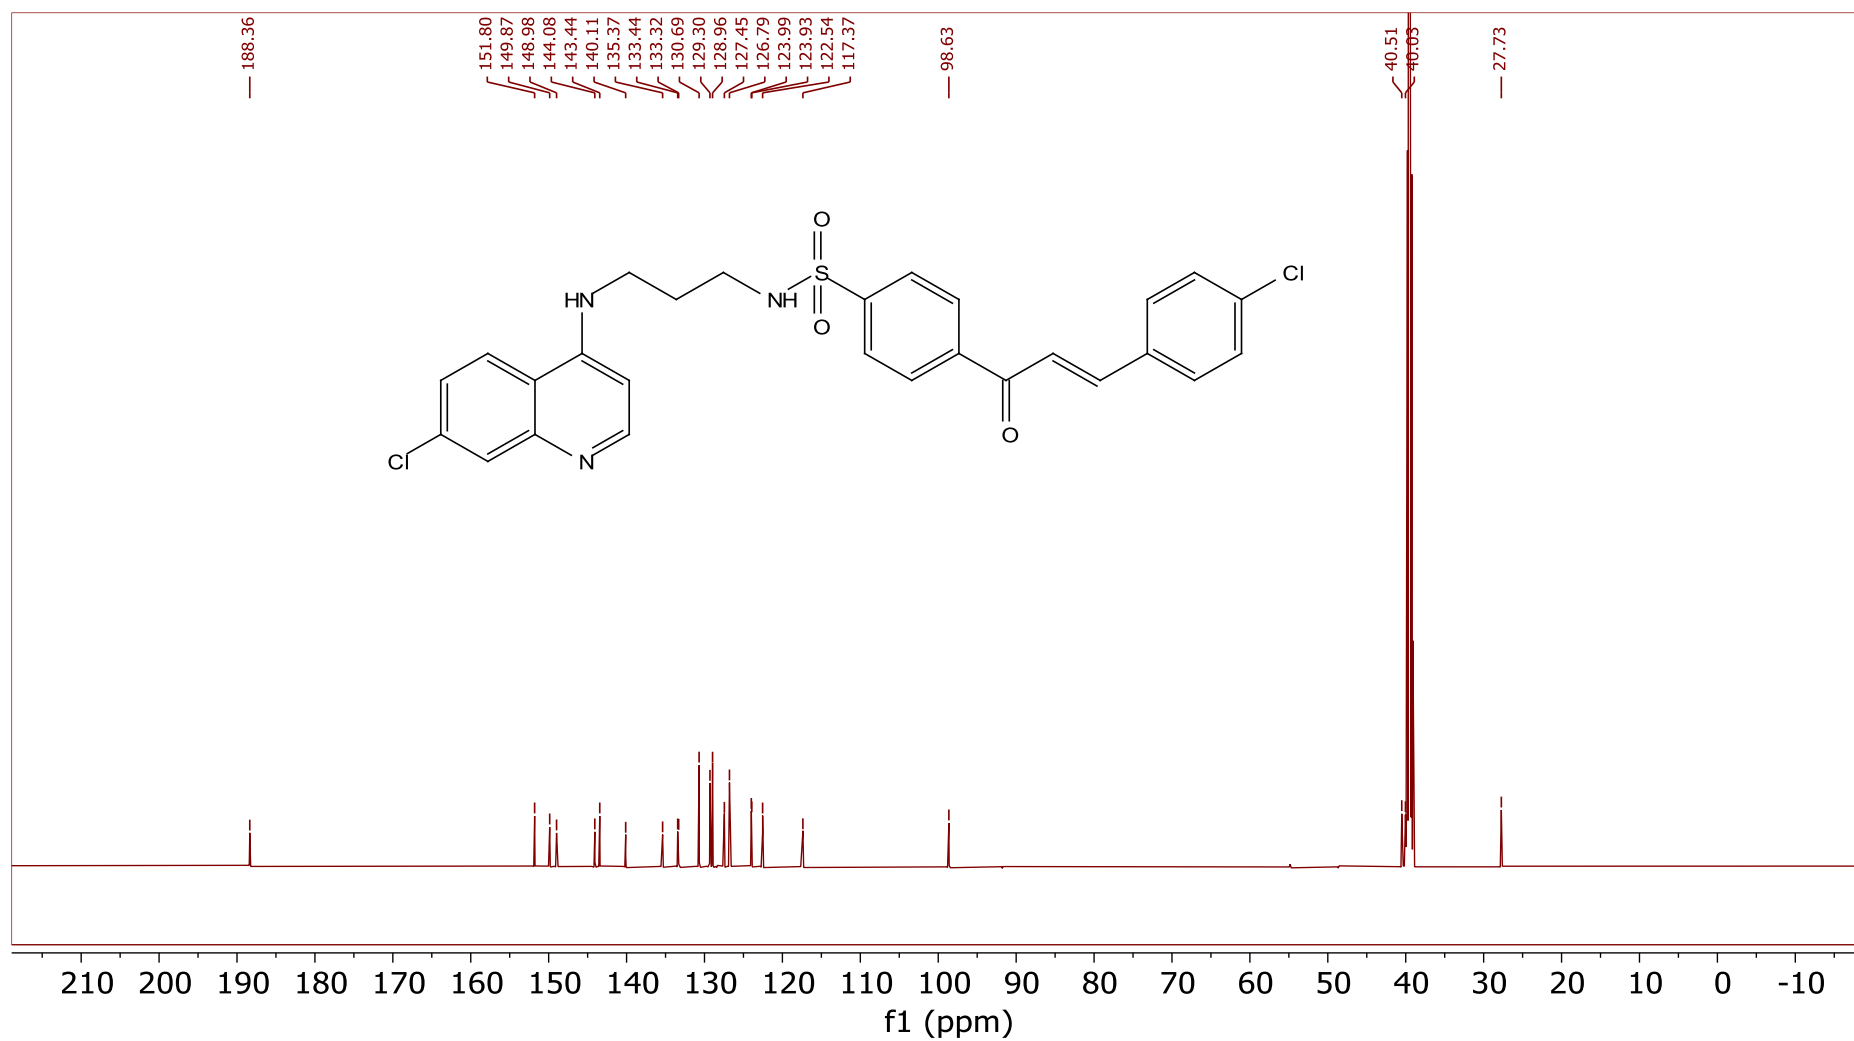

**S20:** <sup>13</sup>C NMR spectrum of (E)-4-(3-(4-Chlorophenyl)acryloyl)-N-(3-((7-chloroquinolin-4-yl)amino)propyl)benzenesulfonamide **11**

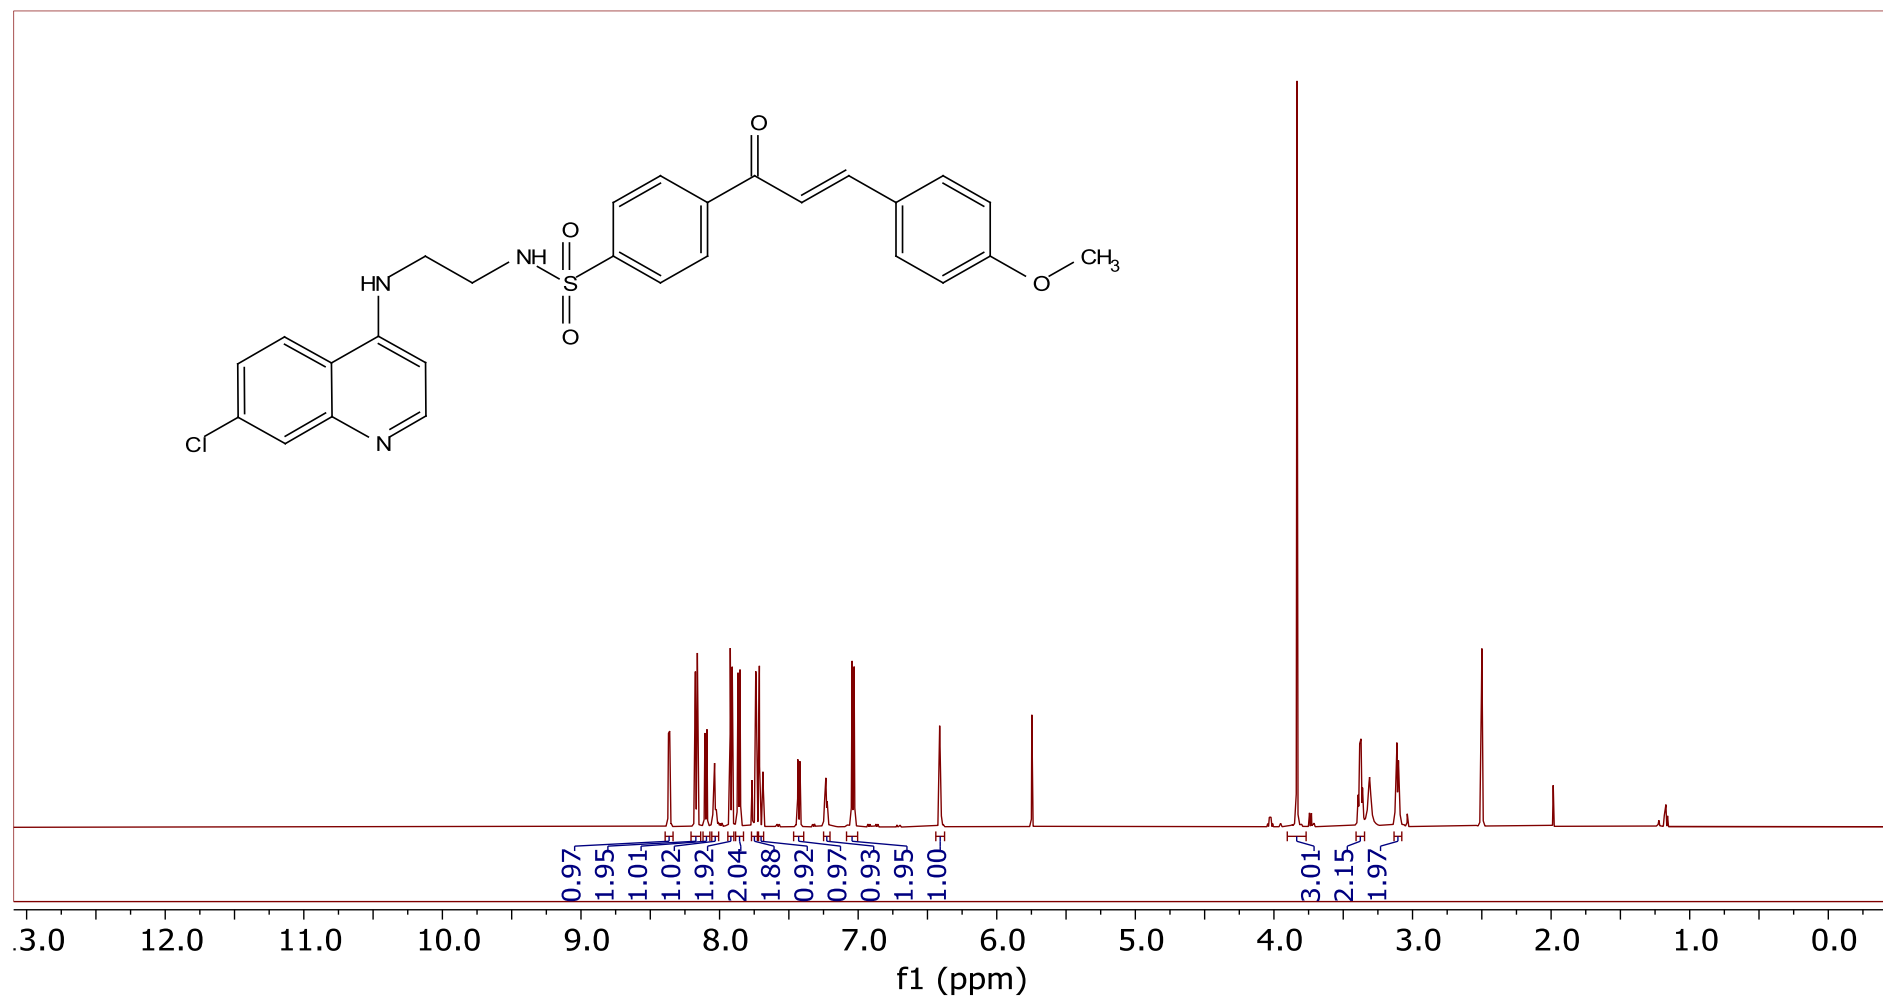

**S21:** <sup>1</sup>H NMR spectrum of (E)-N-(3-((7-chloroquinolin-4-yl)amino)propyl)-4-(3-(4-methoxyphenyl)acryloyl)benzenesulfonamide **12**

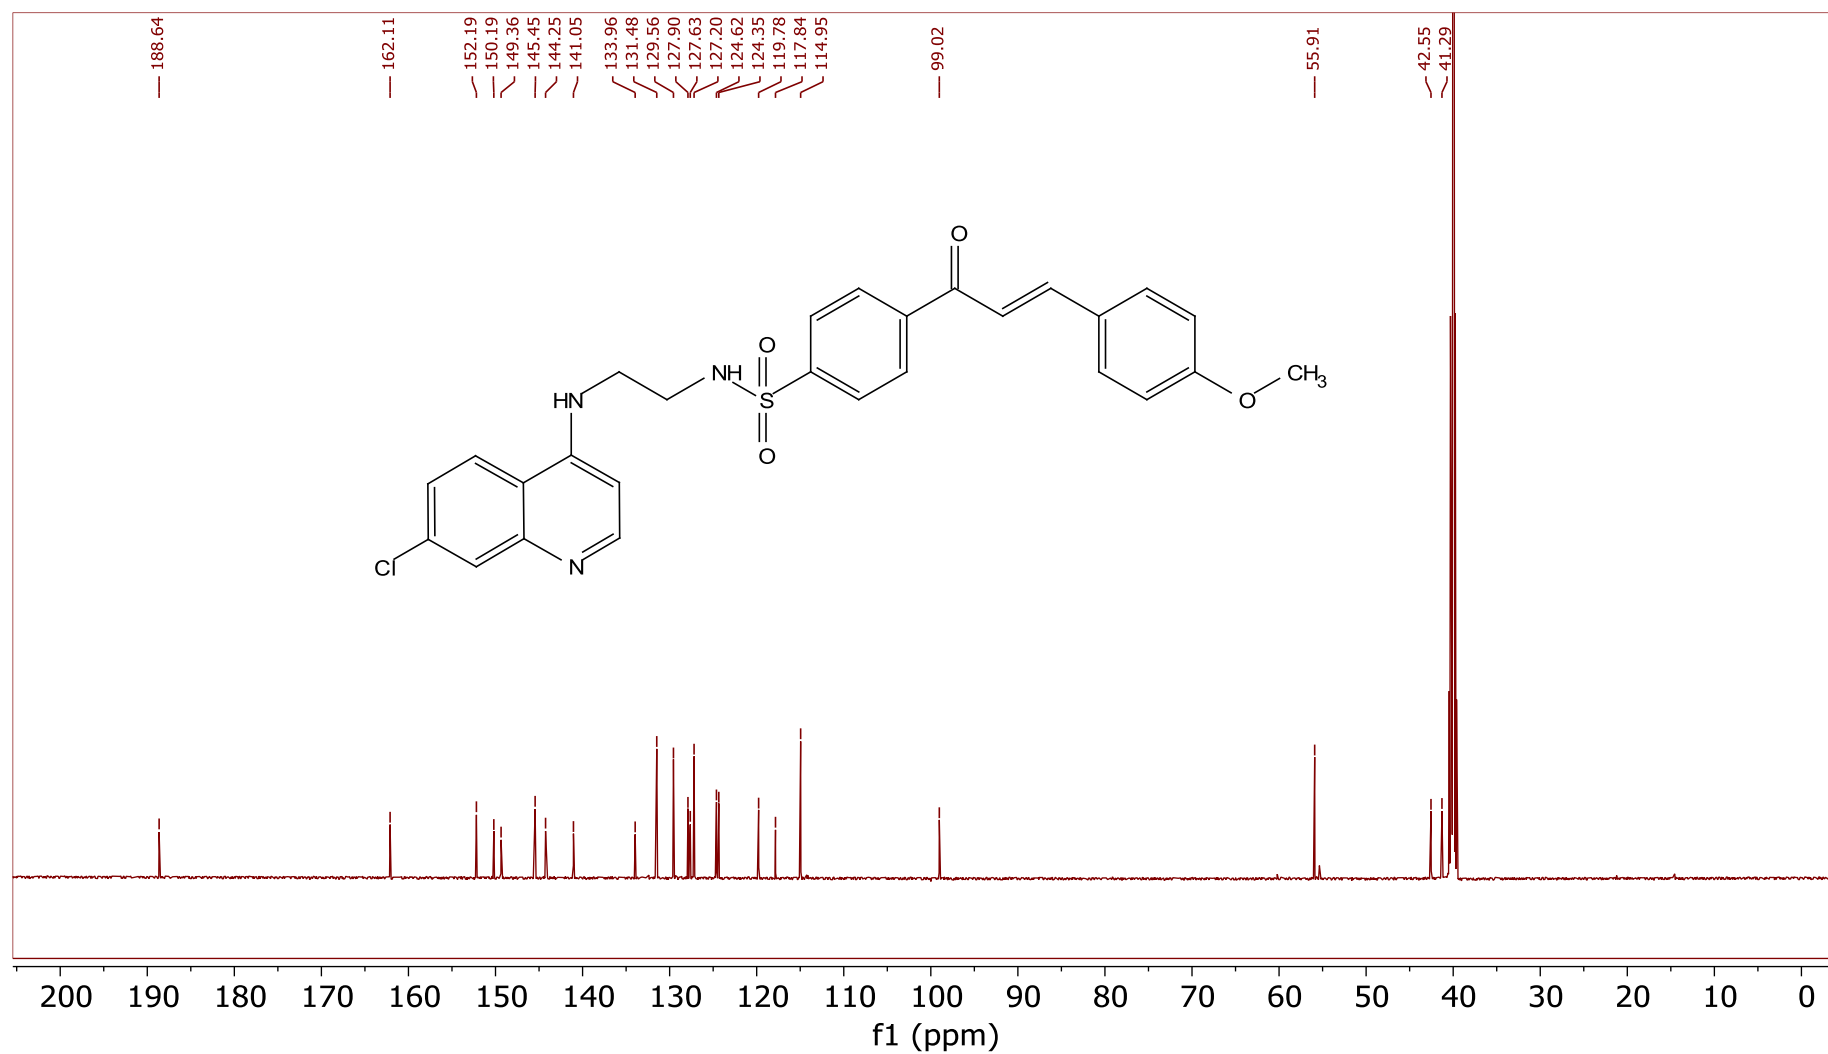

**S22:** <sup>13</sup>C NMR spectrum of (*E*)-*N*-(3-((7-Chloroquinolin-4-yl)amino)propyl)-4-(3-(4-methoxyphenyl)acryloyl)benzenesulfonamide **12**

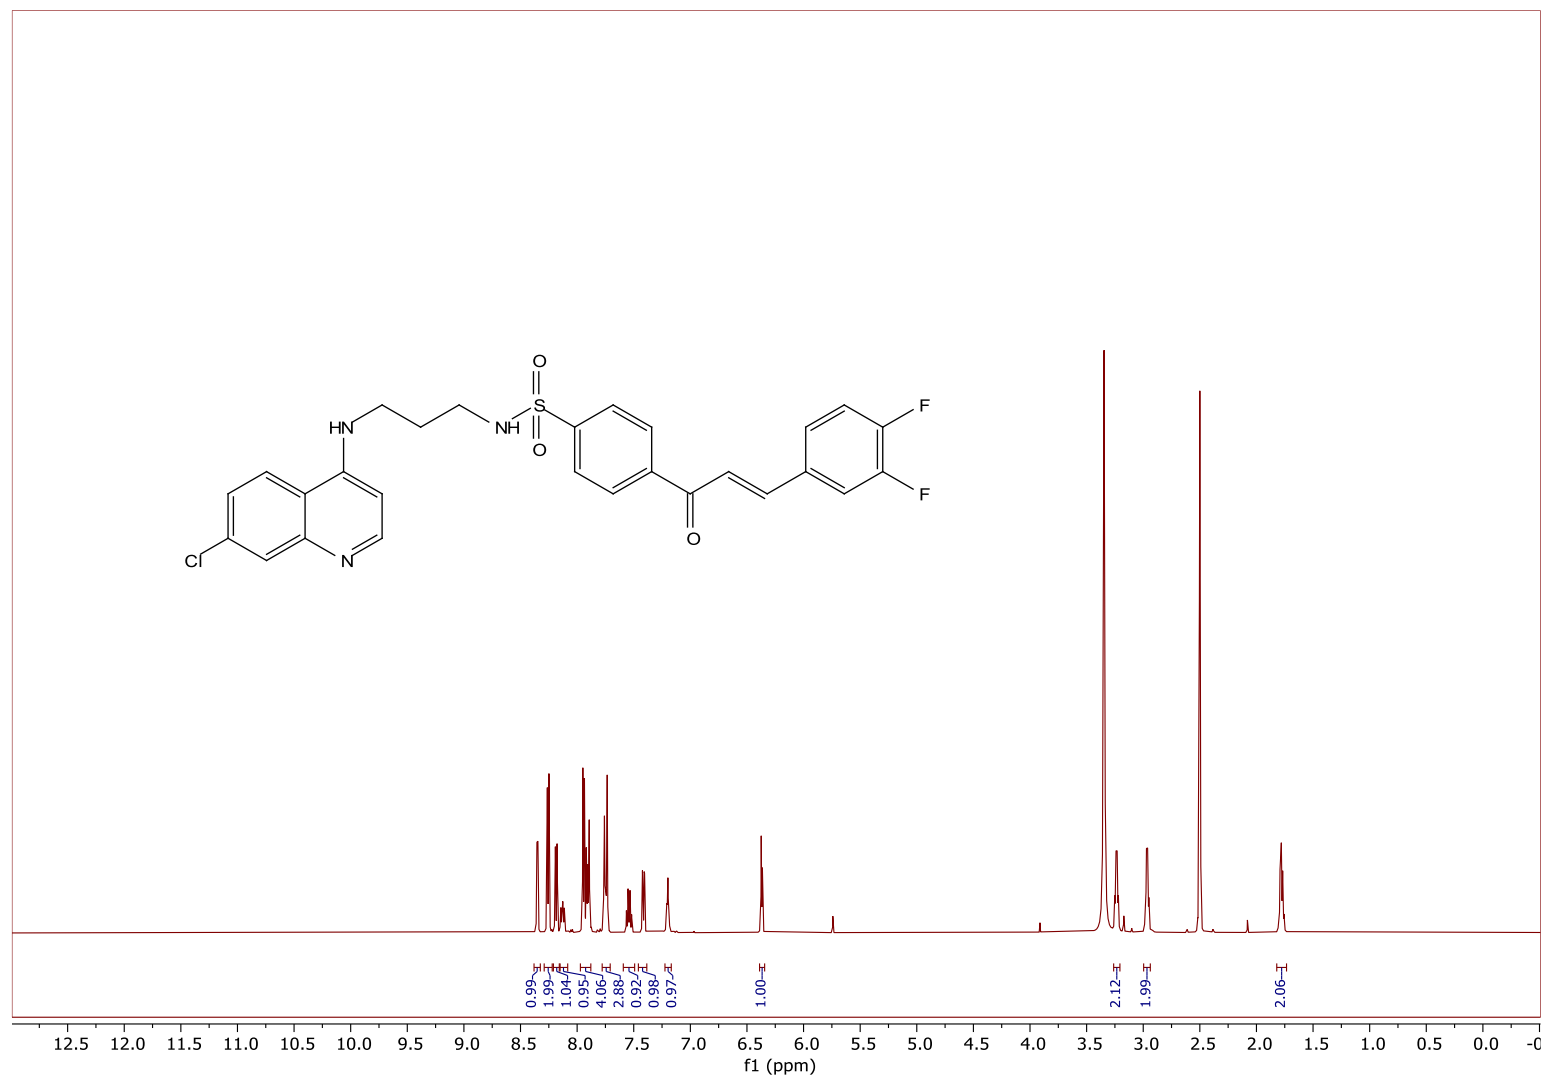

**S23:** <sup>1</sup>H NMR spectrum of *(E)*-*N*-(3-((7-chloroquinolin-4-yl)amino)propyl)-4-(3-(3,4-difluorophenyl)acryloyl)benzenesulfonamide **13**





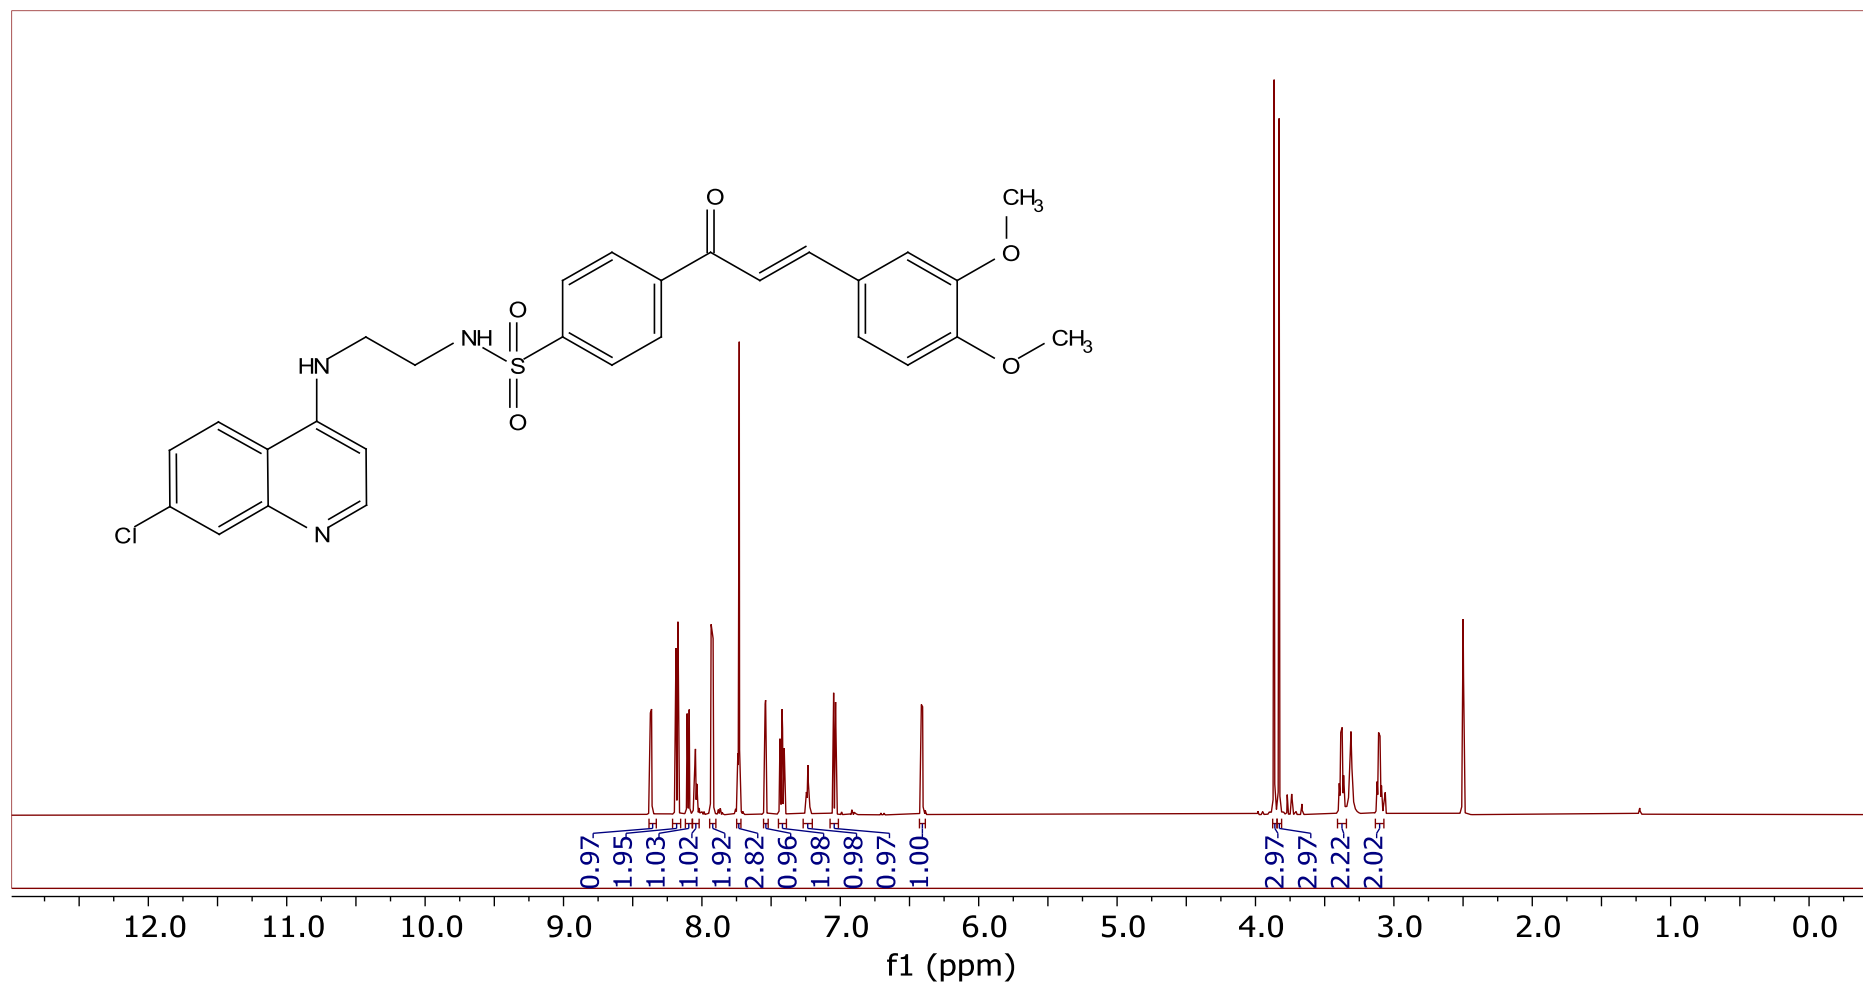

**S25:** <sup>1</sup>H NMR spectrum of (E)-N-(3-((7-Chloroquinolin-4-yl)amino)propyl)-4-(3-(3,4-dimethoxyphenyl)acryloyl)benzenesulfonamide **14**

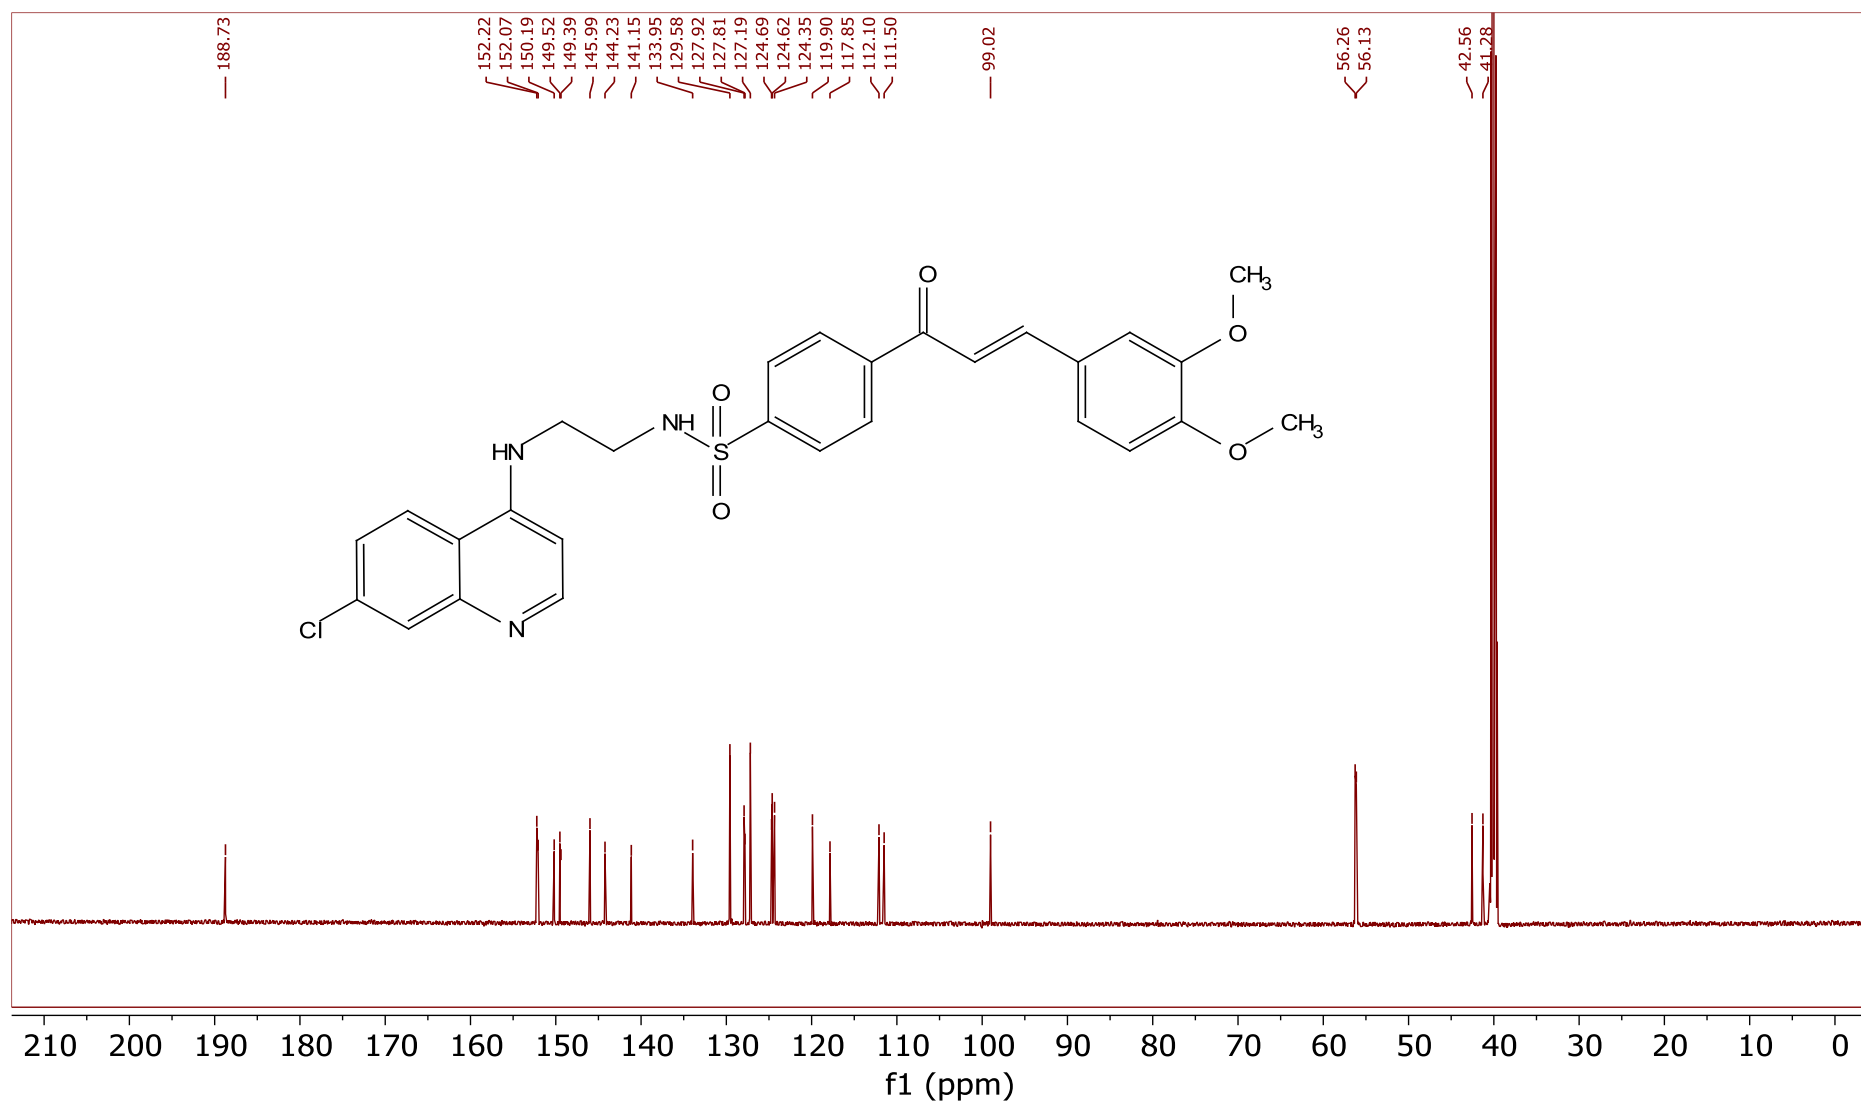

**S26:** <sup>13</sup>C NMR spectrum of (E)-N-(3-((7-Chloroquinolin-4-yl)amino)propyl)-4-(3-(3,4-dimethoxyphenyl)acryloyl)benzenesulfonamide **14**

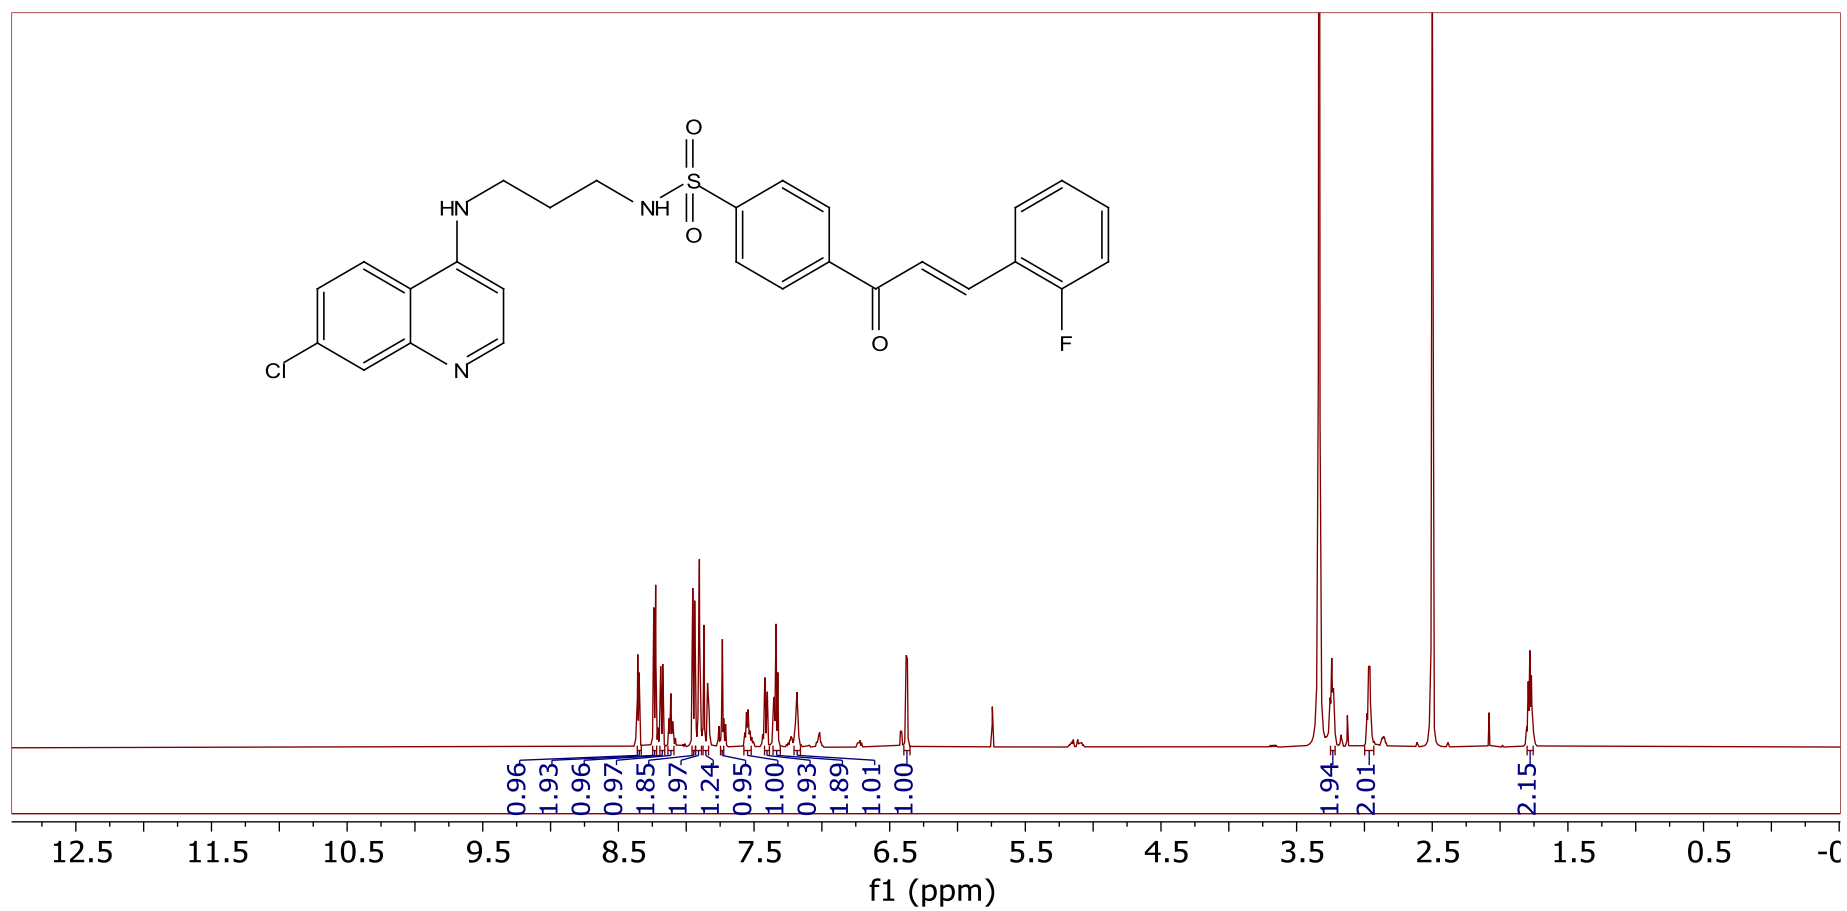

**S27:** <sup>1</sup>H NMR of (E)-N-(3-((7-Chloroquinolin-4-yl)amino)propyl)-4-(3-(2-fluorophenyl)acryloyl)benzenesulfonamide **15**

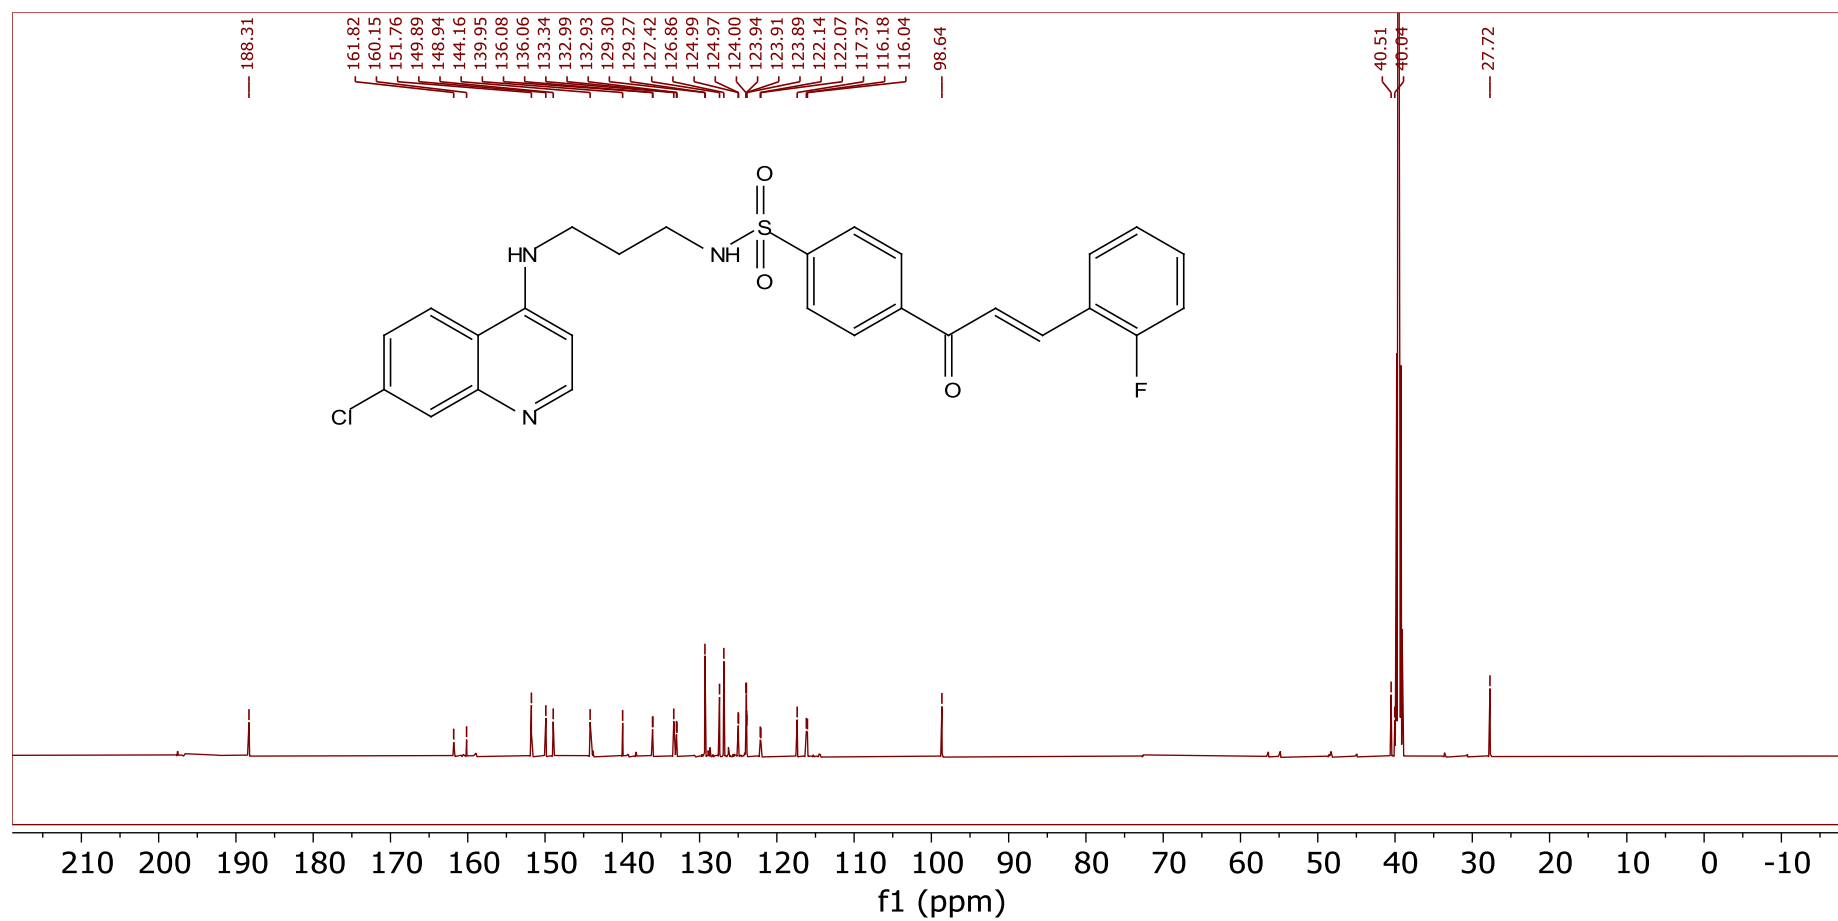

**S28:** <sup>13</sup>C NMR of (E)-N-(3-((7-Chloroquinolin-4-yl)amino)propyl)-4-(3-(2-fluorophenyl)acryloyl)benzenesulfonamide **15**

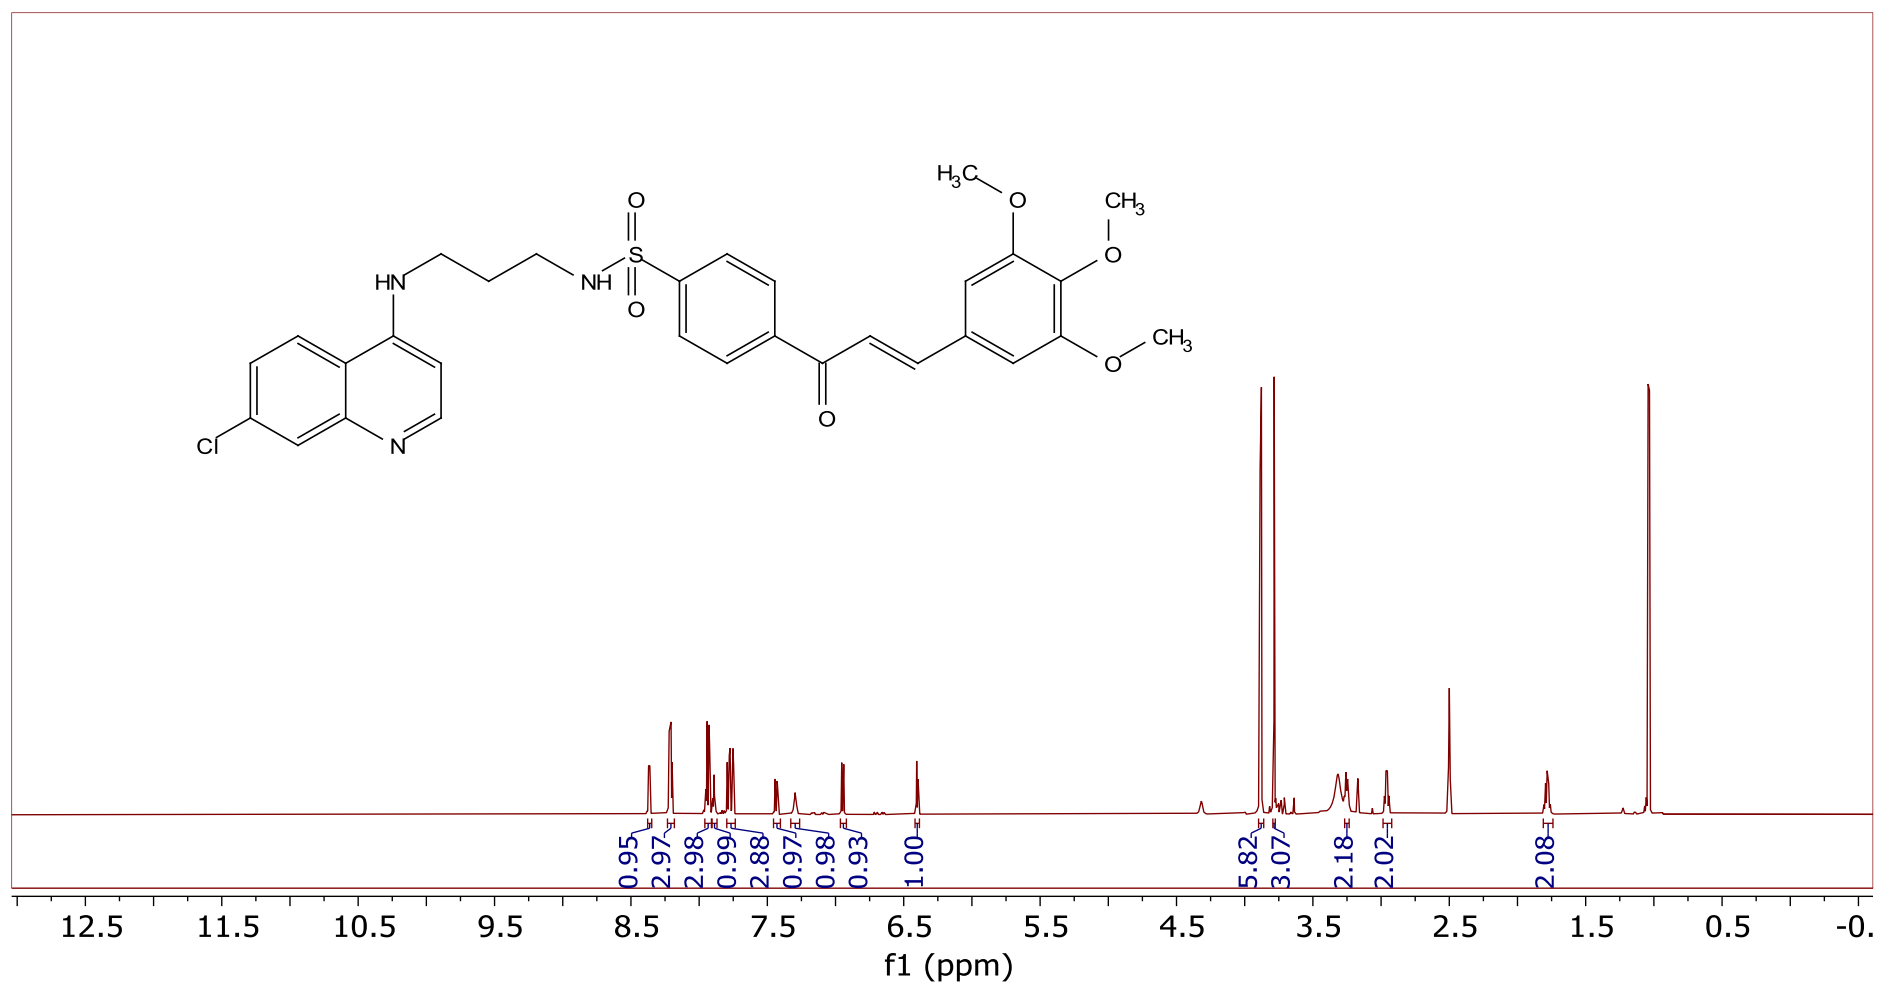

**S29:** <sup>1</sup>H NMR spectrum of (E)-N-(3-((7-Chloroquinolin-4-yl)amino)propyl)-4-(3-(3,4,5-trimethoxyphenyl)acryloyl)benzenesulfonamide **16**

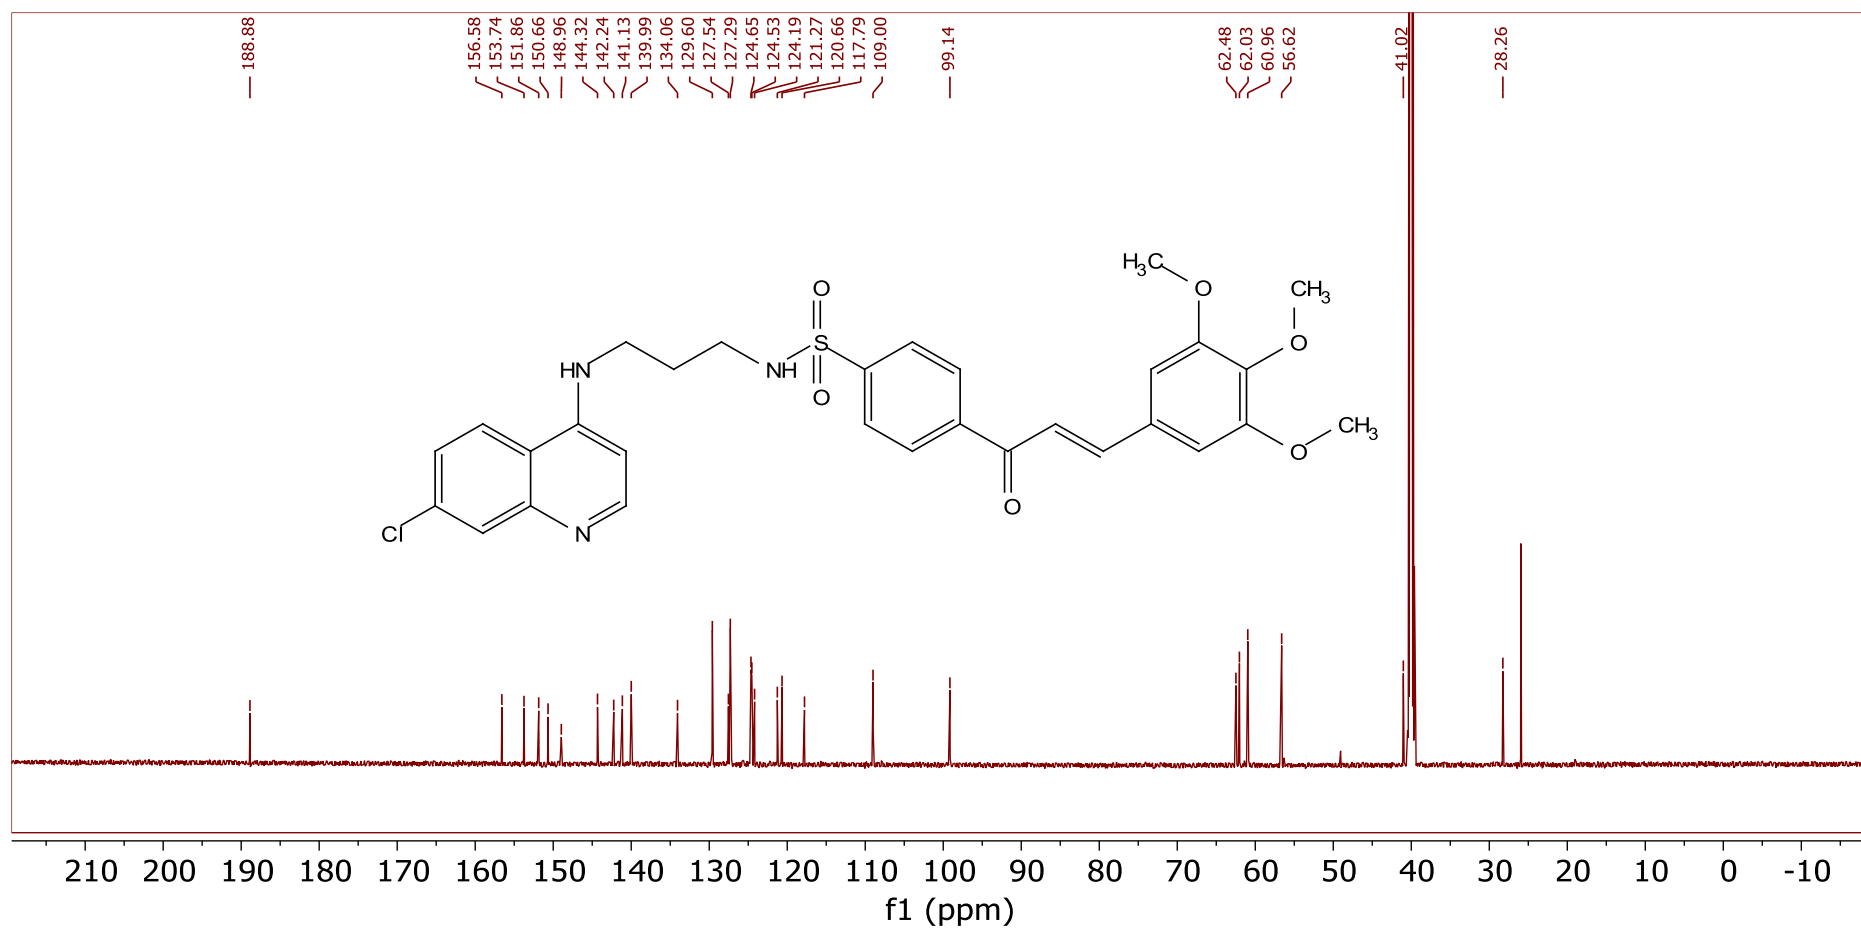

**S30:** <sup>13</sup>C NMR spectrum of (E)-N-(3-((7-Chloroquinolin-4-yl)amino)propyl)-4-(3-(3,4,5-trimethoxyphenyl)acryloyl)benzenesulfonamide **16**

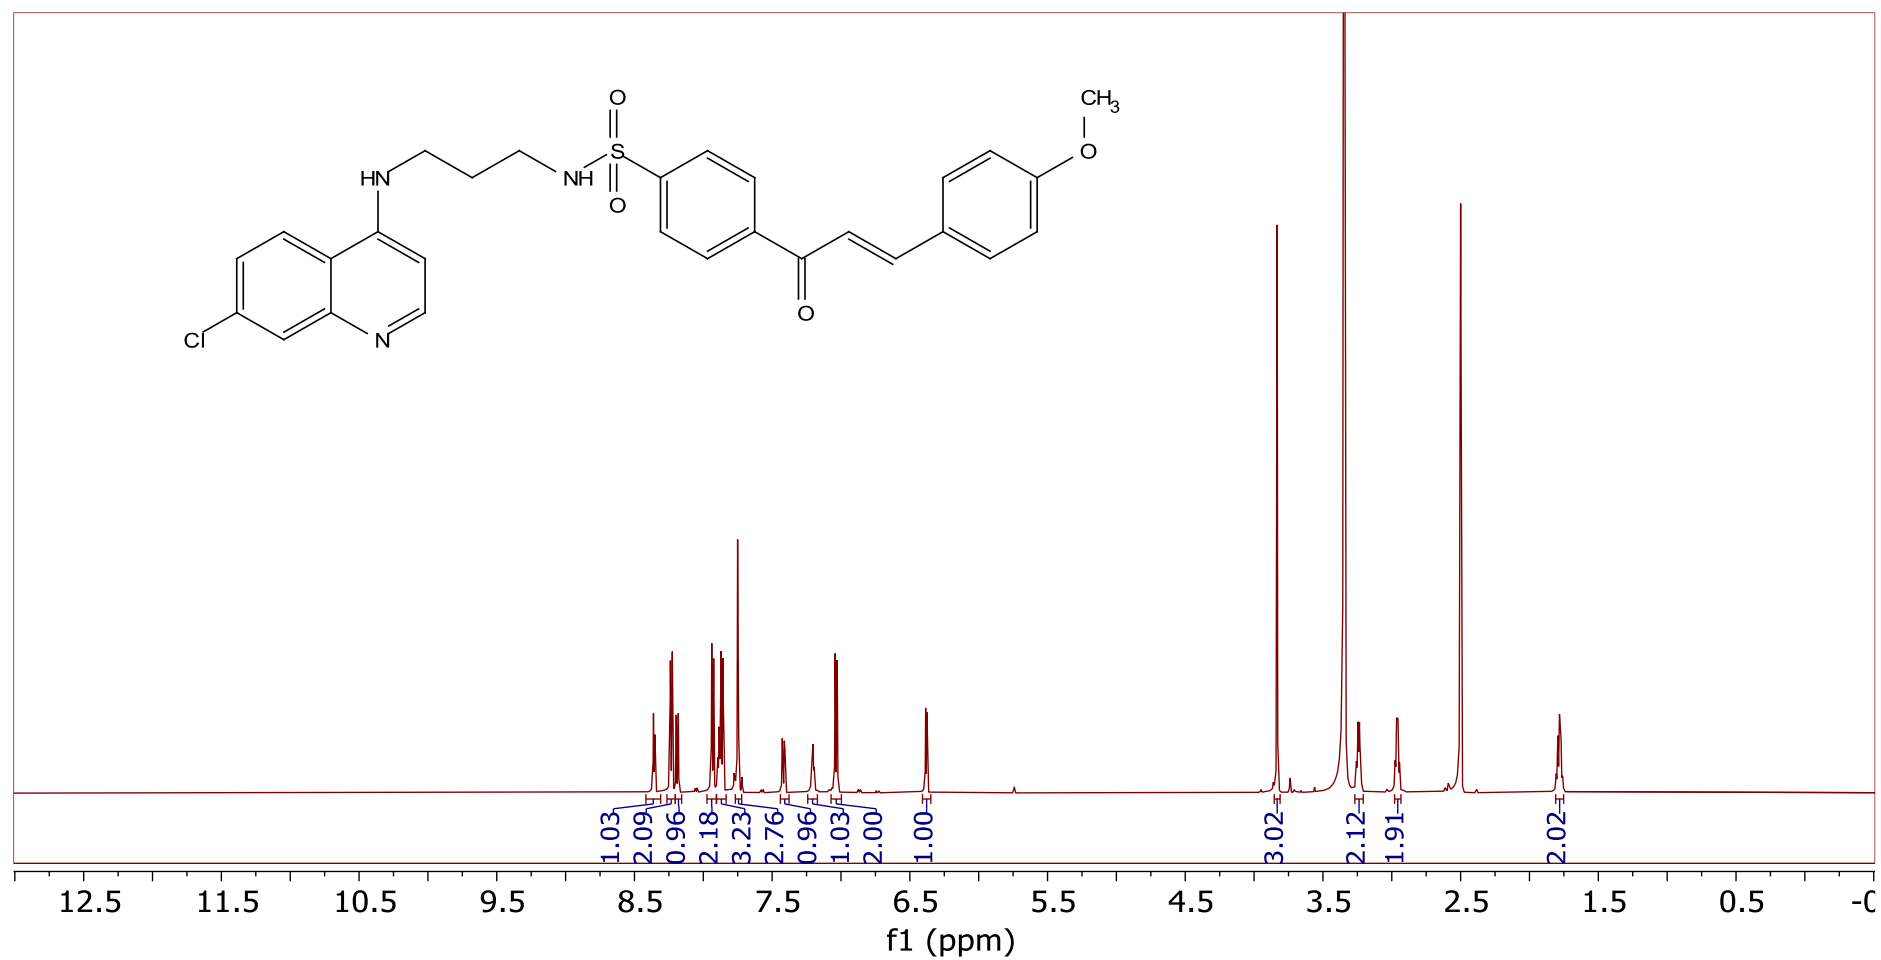

**S31:** <sup>1</sup>H NMR spectrum of (*E*)-*N*-(2-((7-Chloroquinolin-4-yl)amino)ethyl)-4-(3-(4-methoxyphenyl)acryloyl)benzenesulfonamide **17**



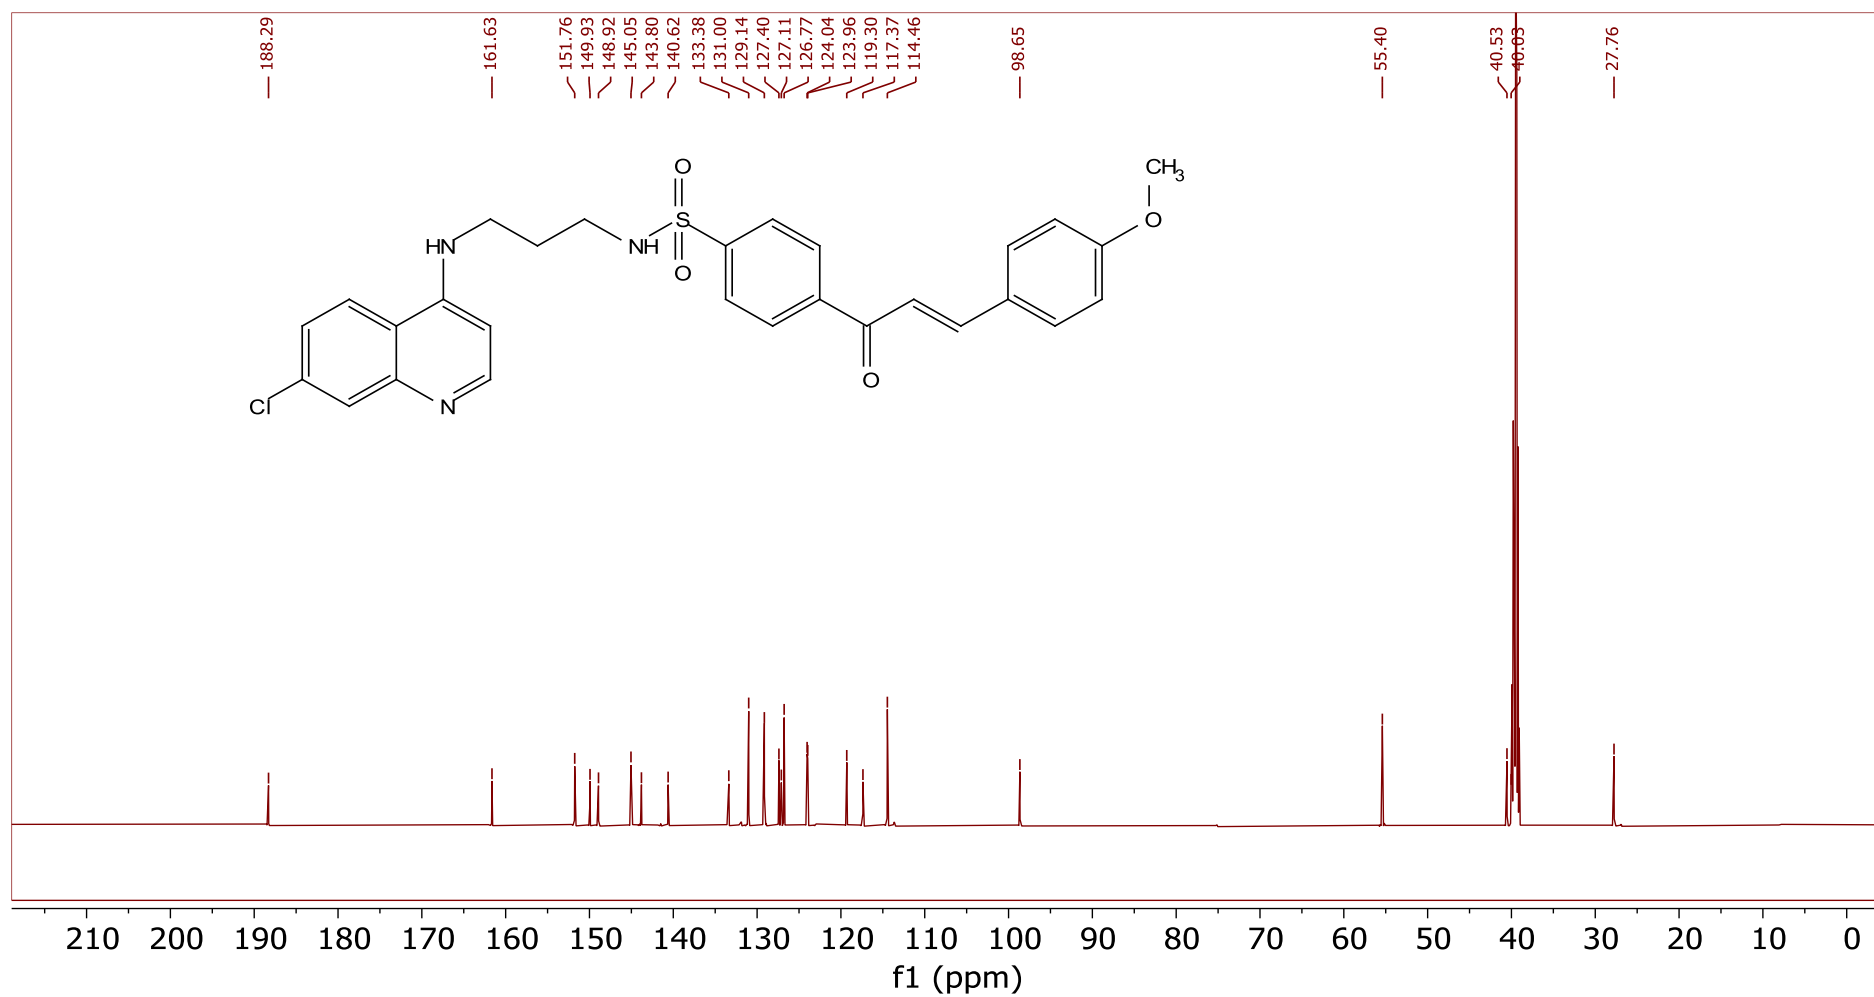

**S32:** <sup>13</sup>C NMR spectrum of (E)-N-(2-((7-Chloroquinolin-4-yl)amino)ethyl)-4-(3-(4-methoxyphenyl)acryloyl)benzenesulfonamide **17**

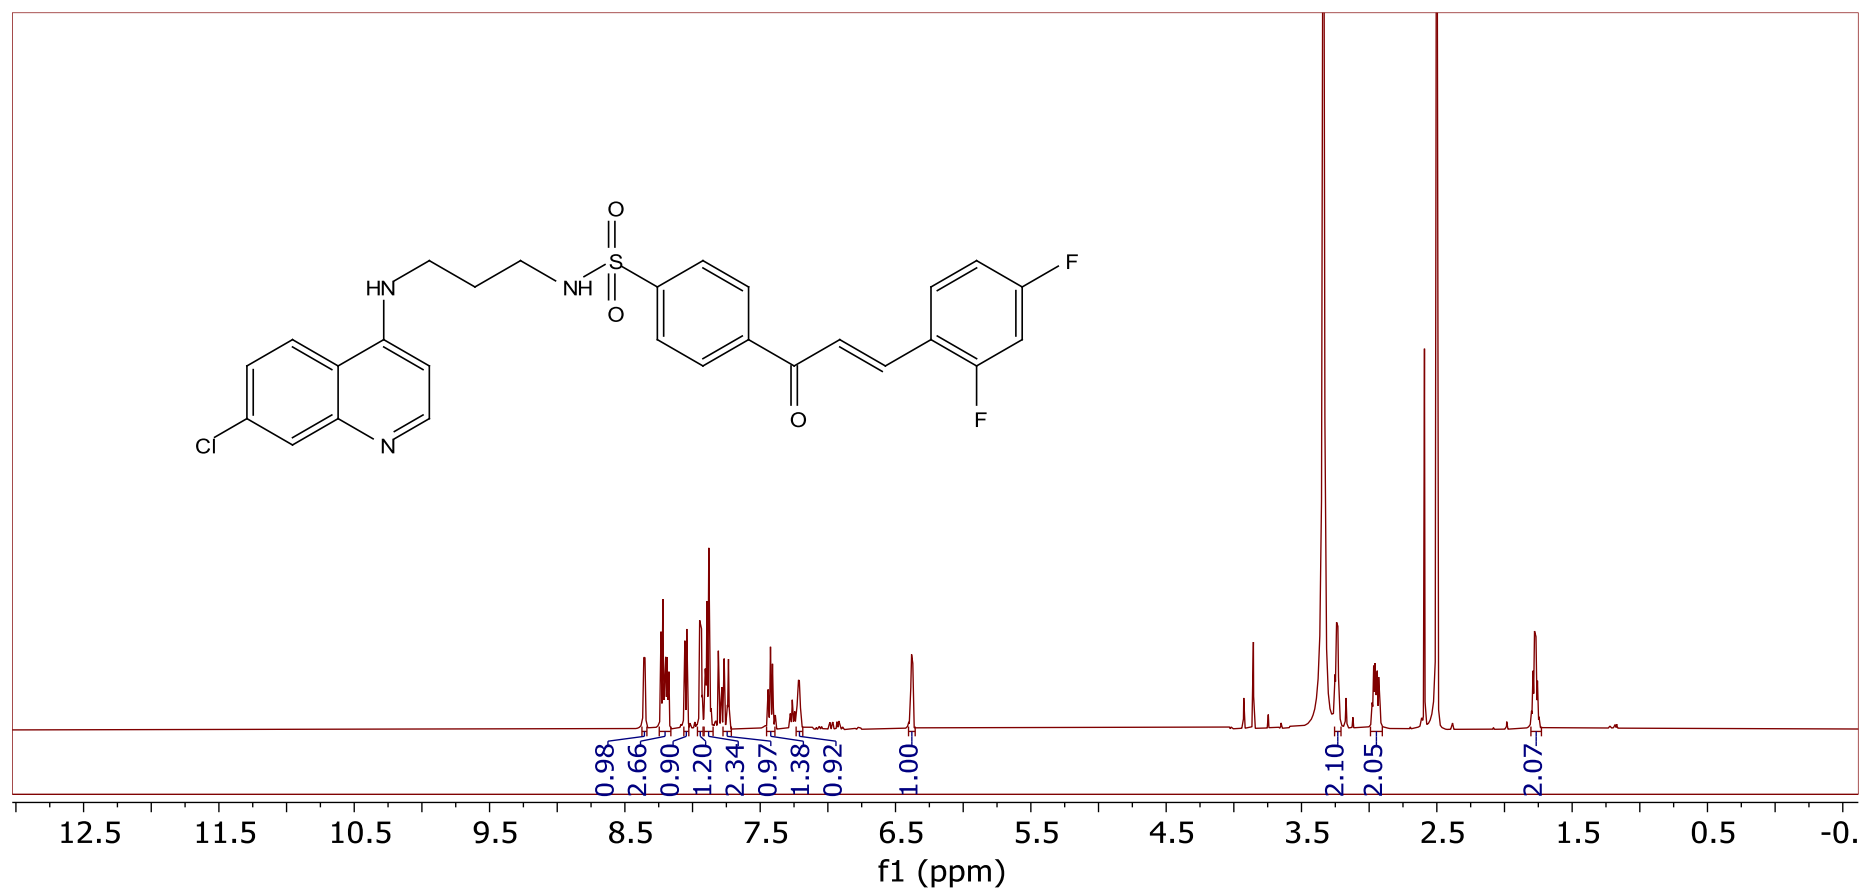

**S33:** <sup>1</sup>H NMR spectrum of (*E*)-*N*-(3-((7-Chloroquinolin-4-yl)amino)propyl)-4-(3-(2,4-difluorophenyl)acryloyl)benzenesulfonamide **18**

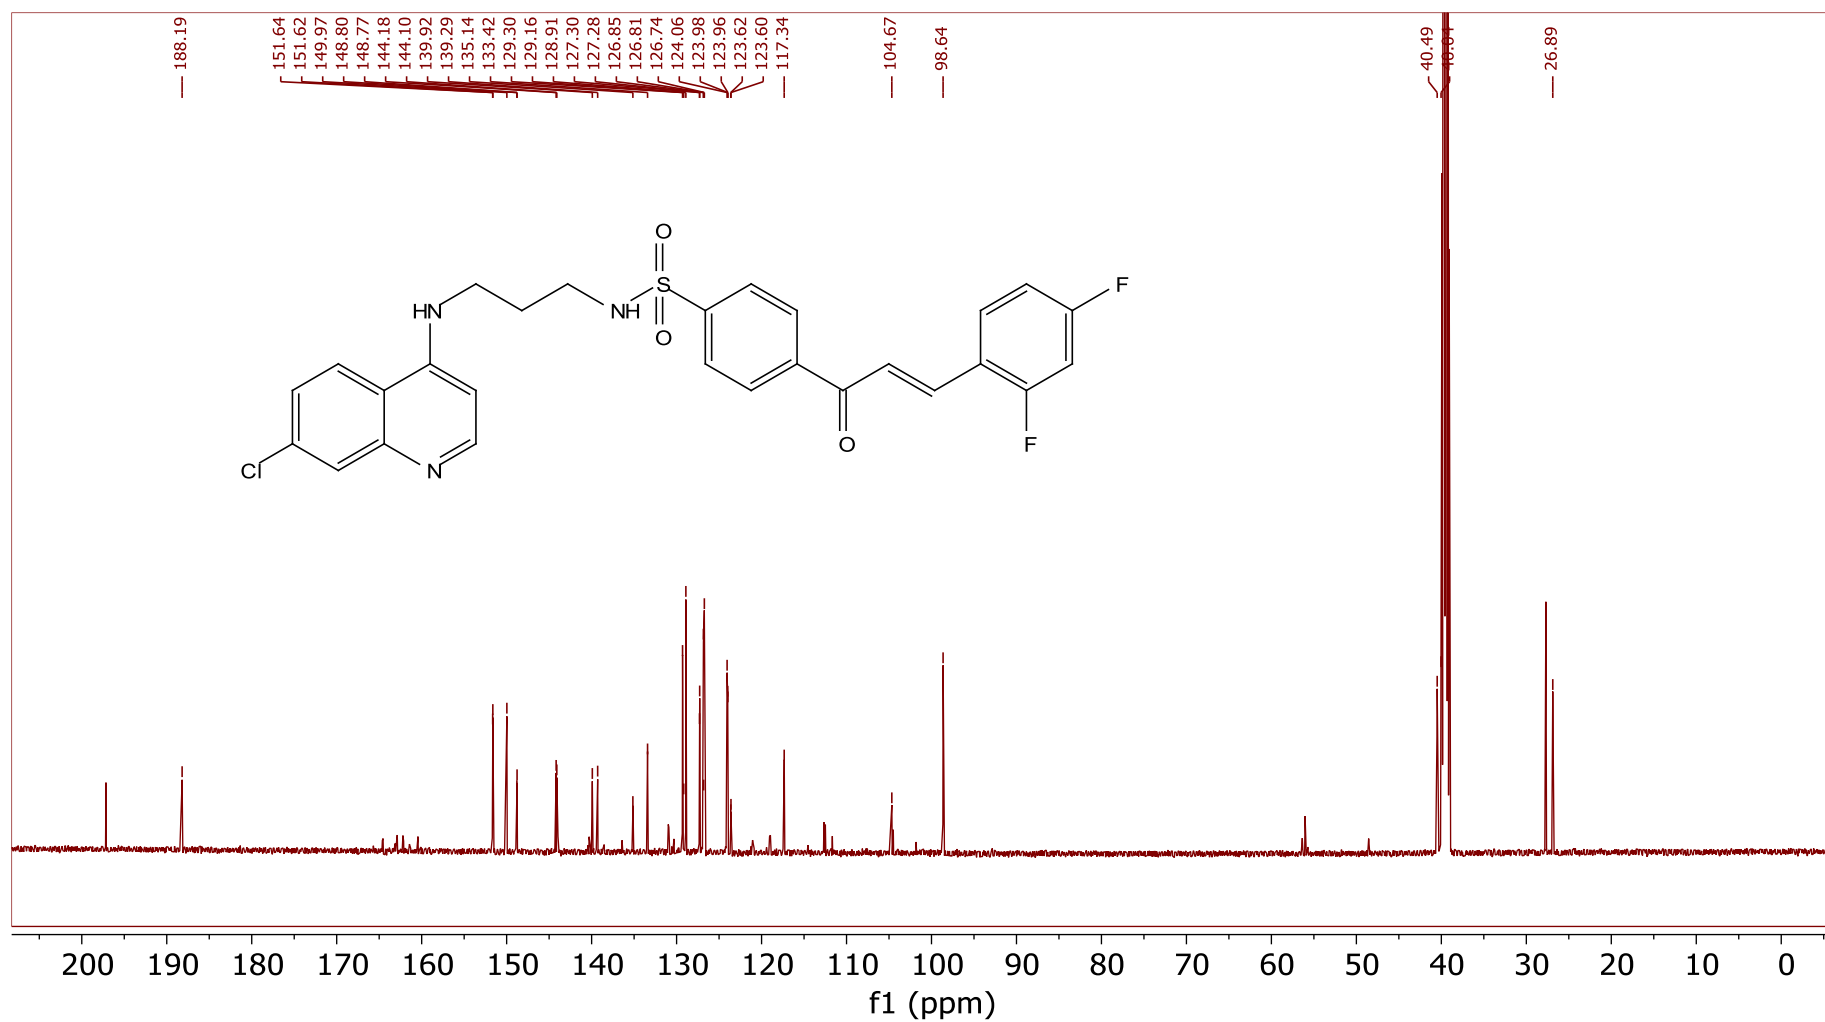

**S34:** <sup>13</sup>C NMR spectrum of *(E)*-*N*-(3-((7-chloroquinolin-4-yl)amino)propyl)-4-(3-(2,4-difluorophenyl)acryloyl)benzenesulfonamide **18**

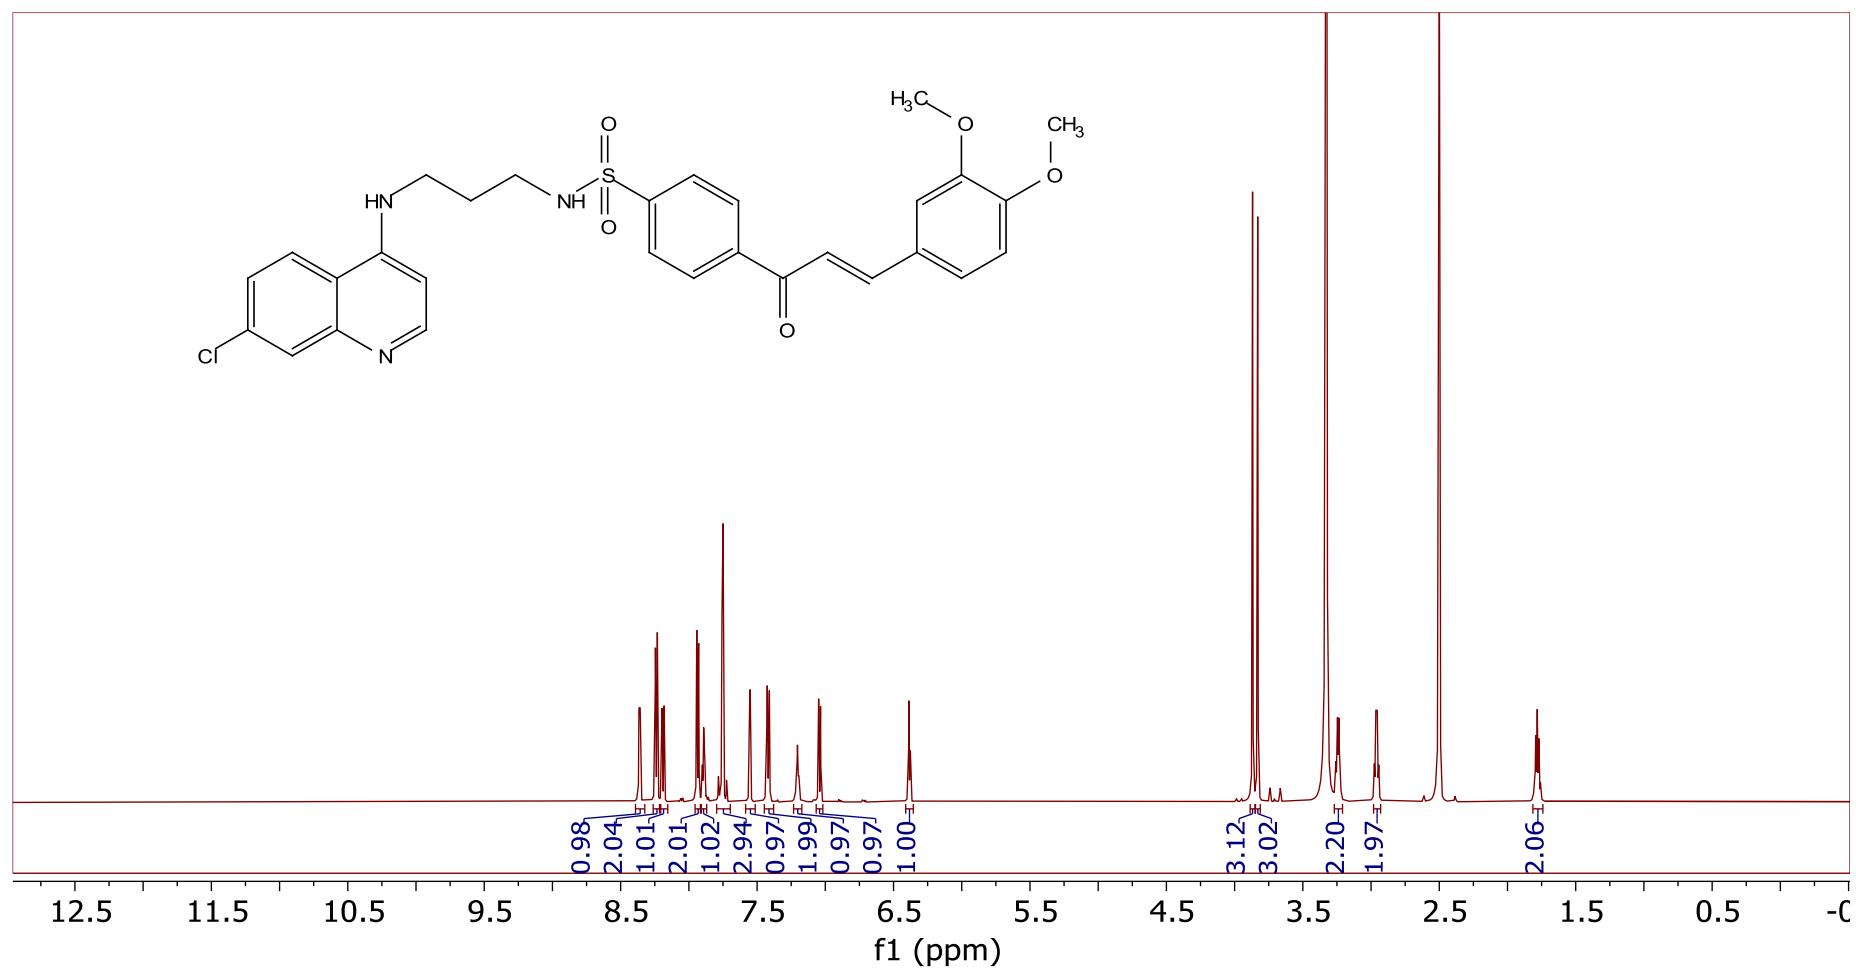

**S35:** <sup>1</sup>H NMR spectrum of (*E*)-*N*-(2-((7-Chloroquinolin-4-yl)amino)ethyl)-4-(3-(3,4-dimethoxyphenyl)acryloyl)benzenesulfonamide **19**

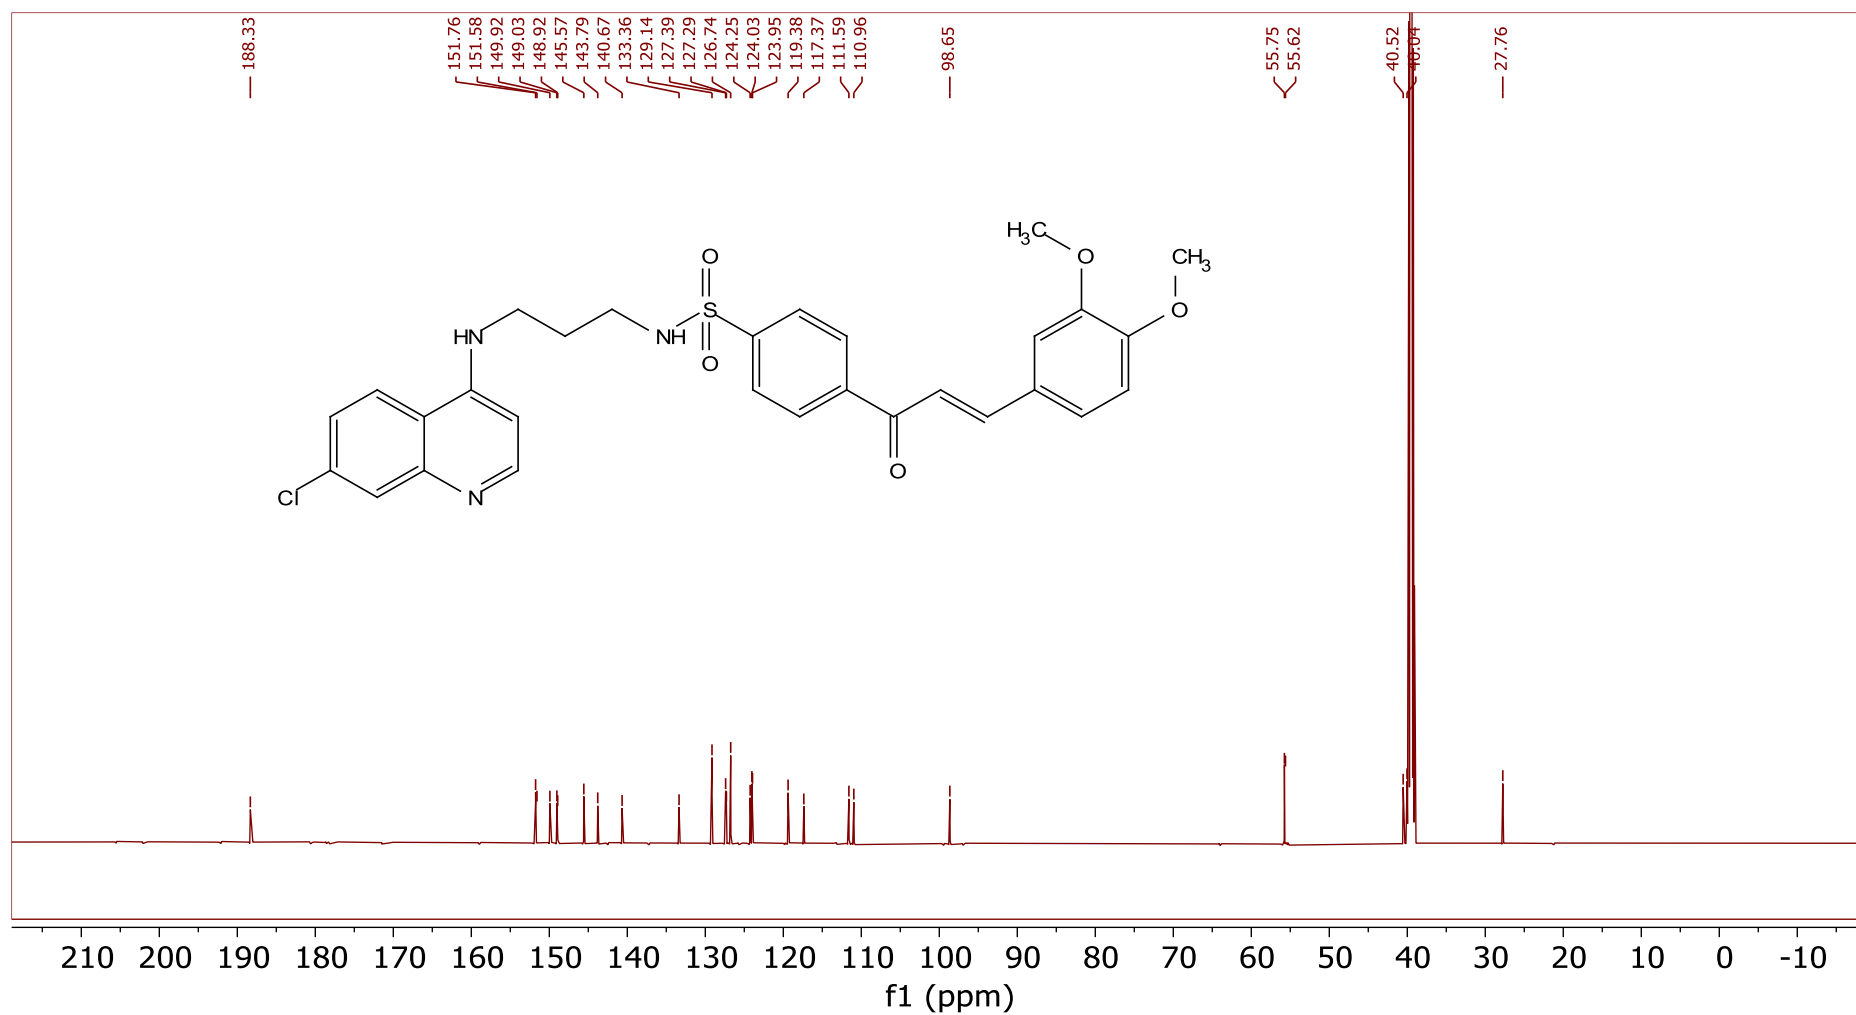

**S36:** <sup>13</sup>C NMR spectrum of *(E)*-*N*-(2-((7-chloroquinolin-4-yl)amino)ethyl)-4-(3-(3,4-dimethoxyphenyl)acryloyl)benzenesulfonamide **19**

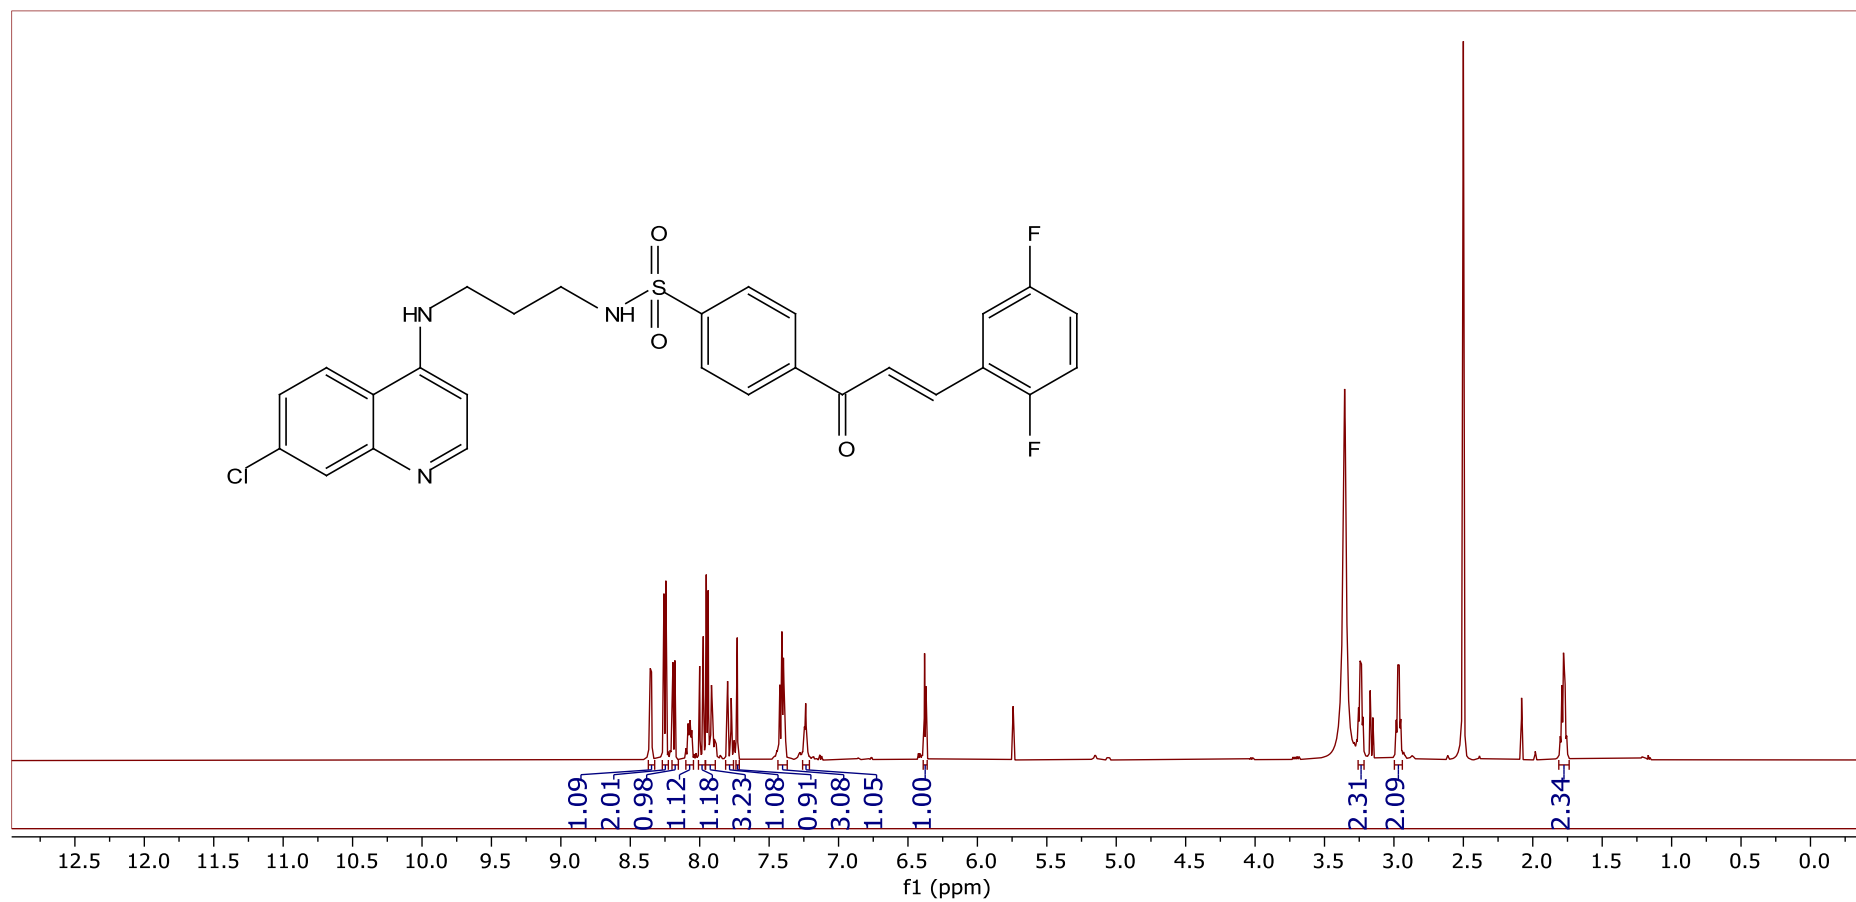

**S37:** <sup>1</sup>H NMR spectrum of (E)-N-(3-((7-Chloroquinolin-4-yl)amino)propyl)-4-(3-(2,5-difluorophenyl)acryloyl)benzenesulfonamide **20**

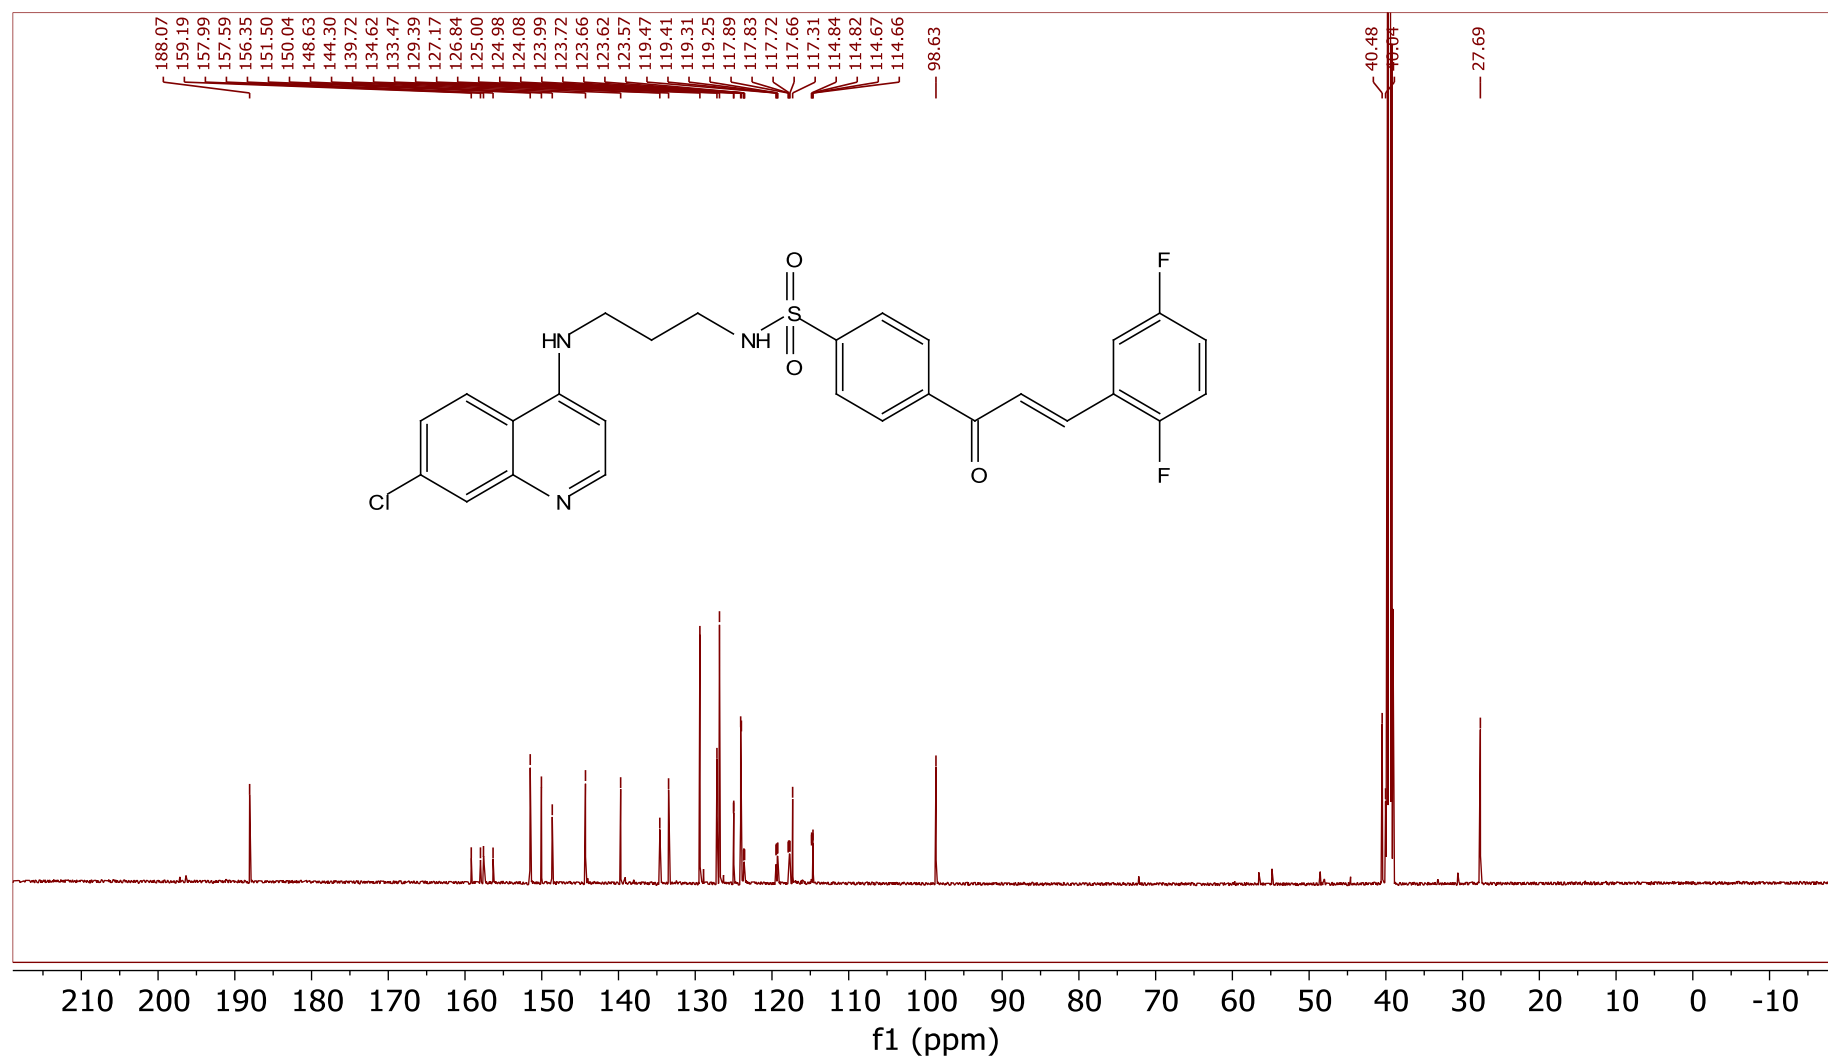

**S38:**  $^{13}\text{C}$  NMR spectrum of (E)-N-(3-((7-chloroquinolin-4-yl)amino)propyl)-4-(3-(2,5-difluorophenyl)acryloyl)benzenesulfonamide **20**

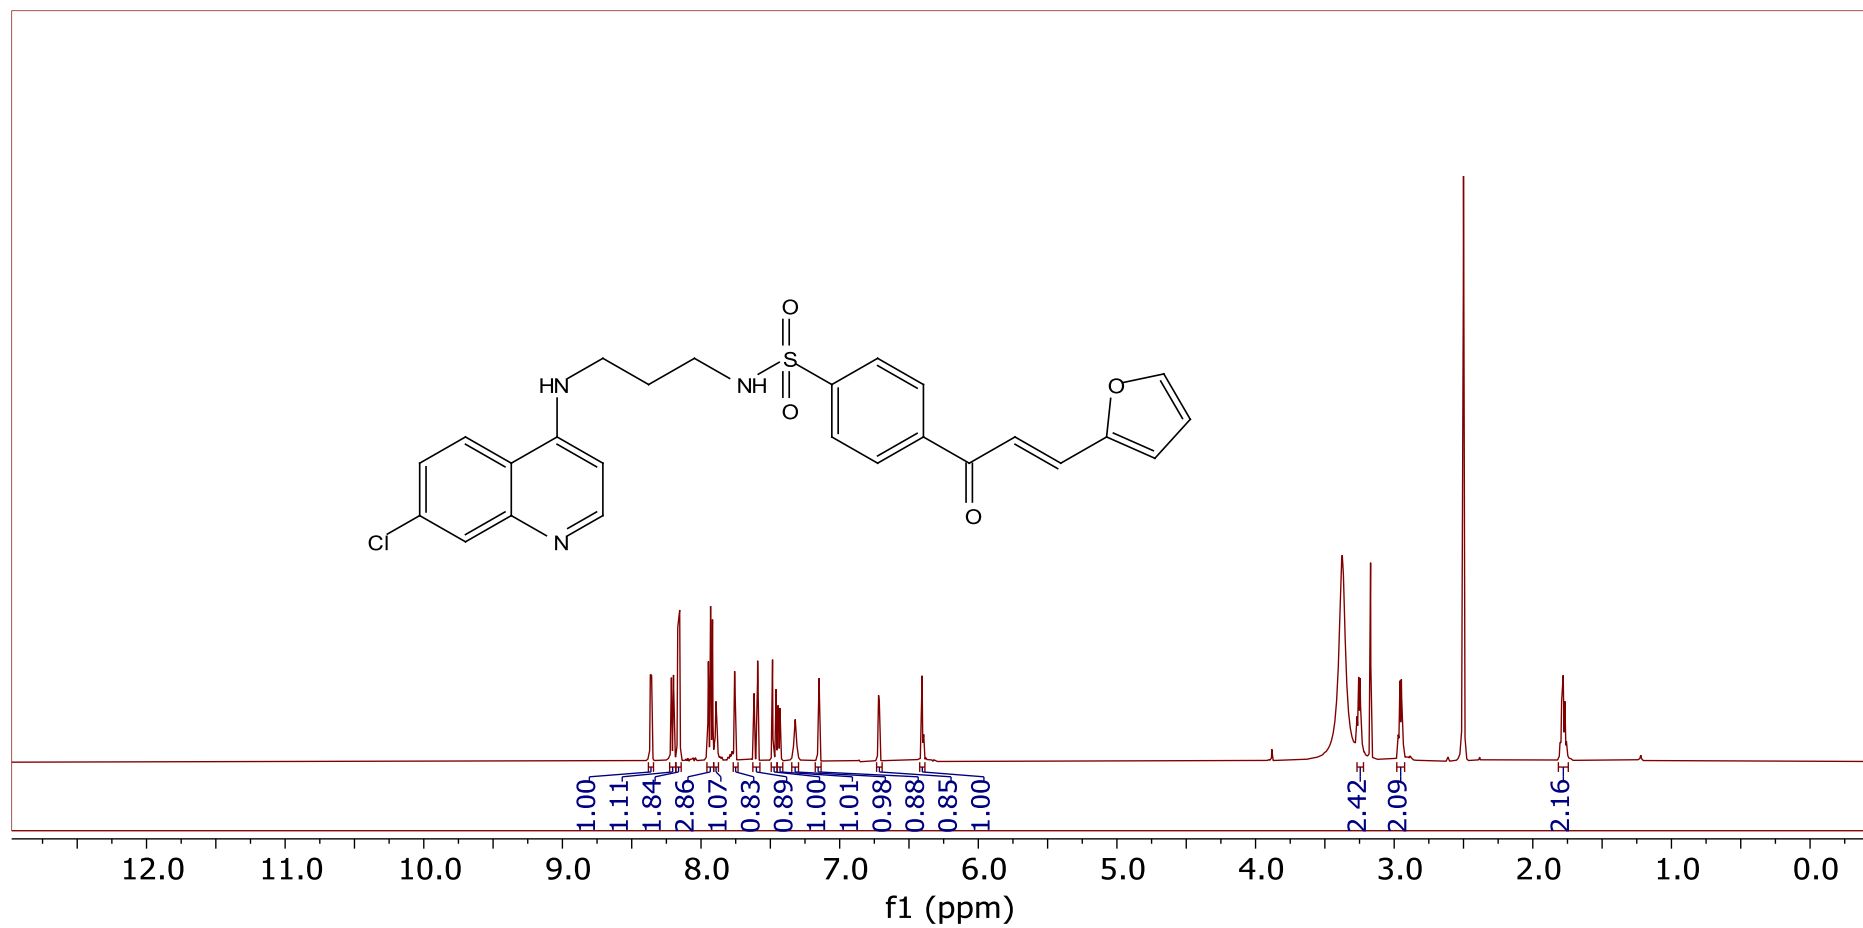

**S39:** <sup>1</sup>H NMR spectrum of *(E)*-*N*-(3-((7-chloroquinolin-4-yl)amino)propyl)-4-(3-(furan-2-yl)acryloyl)benzenesulfonamide **21**



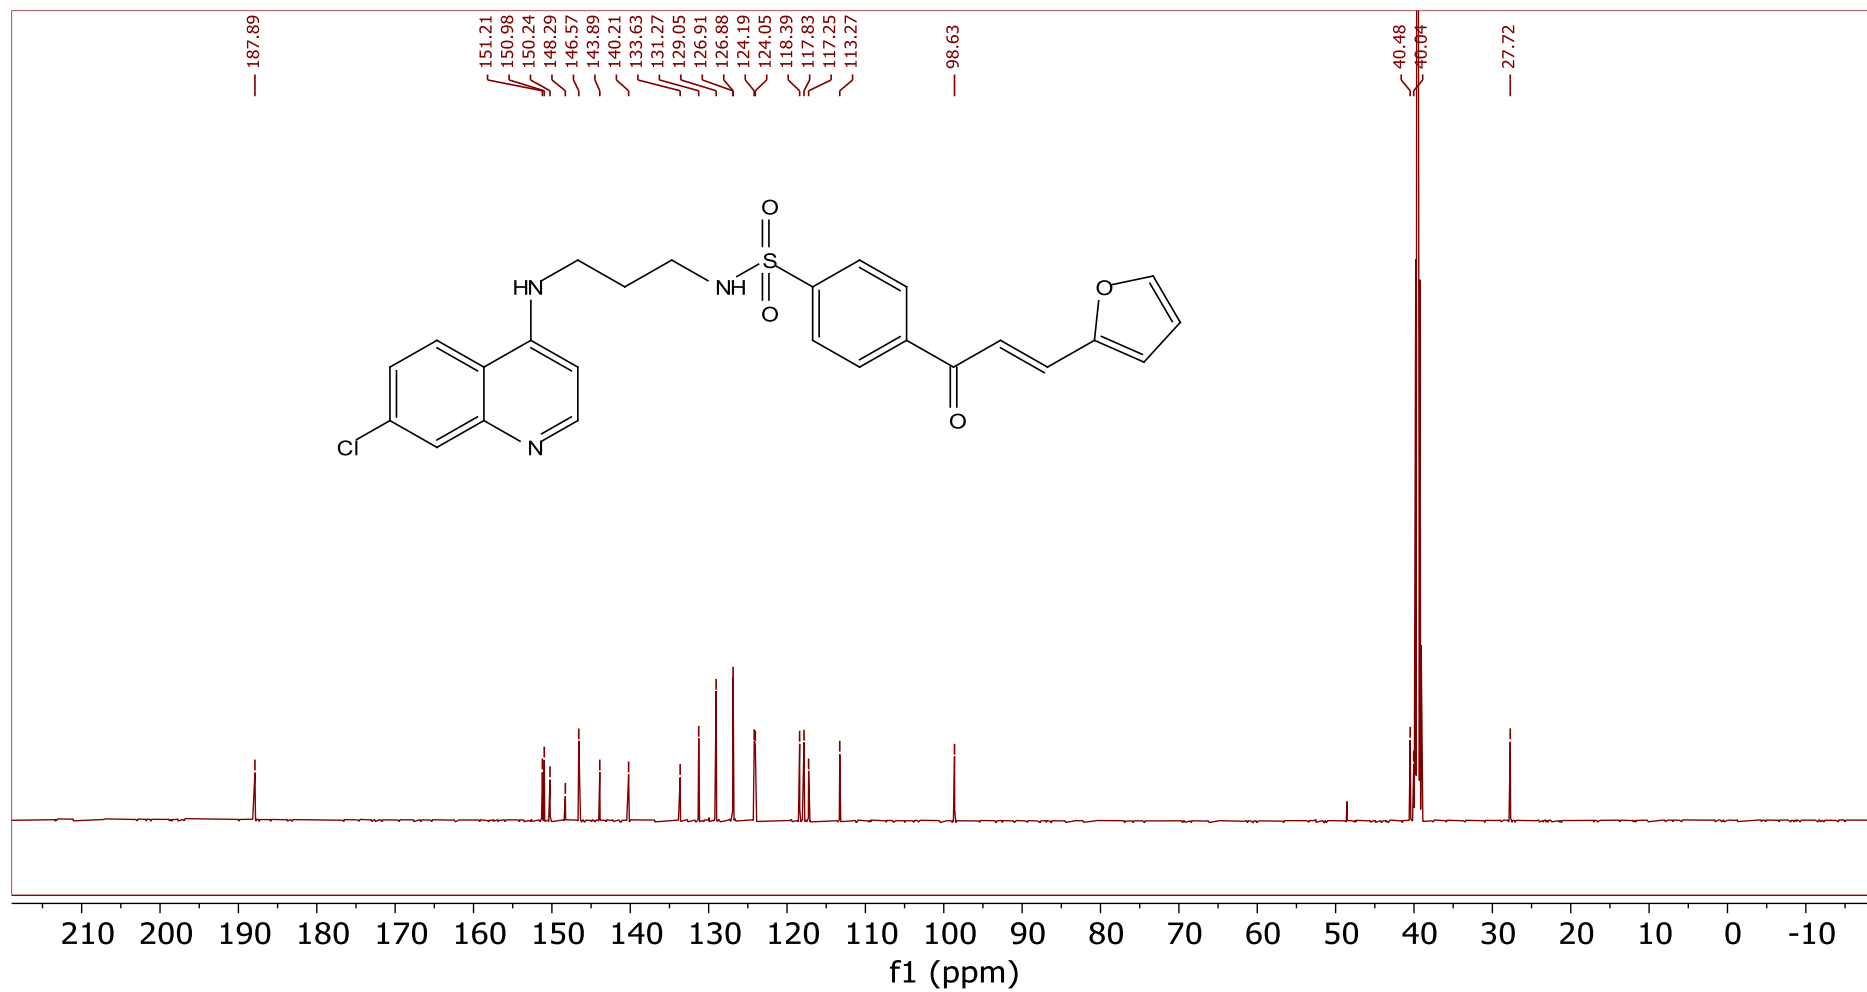

**S40:** <sup>13</sup>C NMR spectrum of (E)-N-(3-((7-Chloroquinolin-4-yl)amino)propyl)-4-(3-(furan-2-yl)acryloyl)benzenesulfonamide **21**

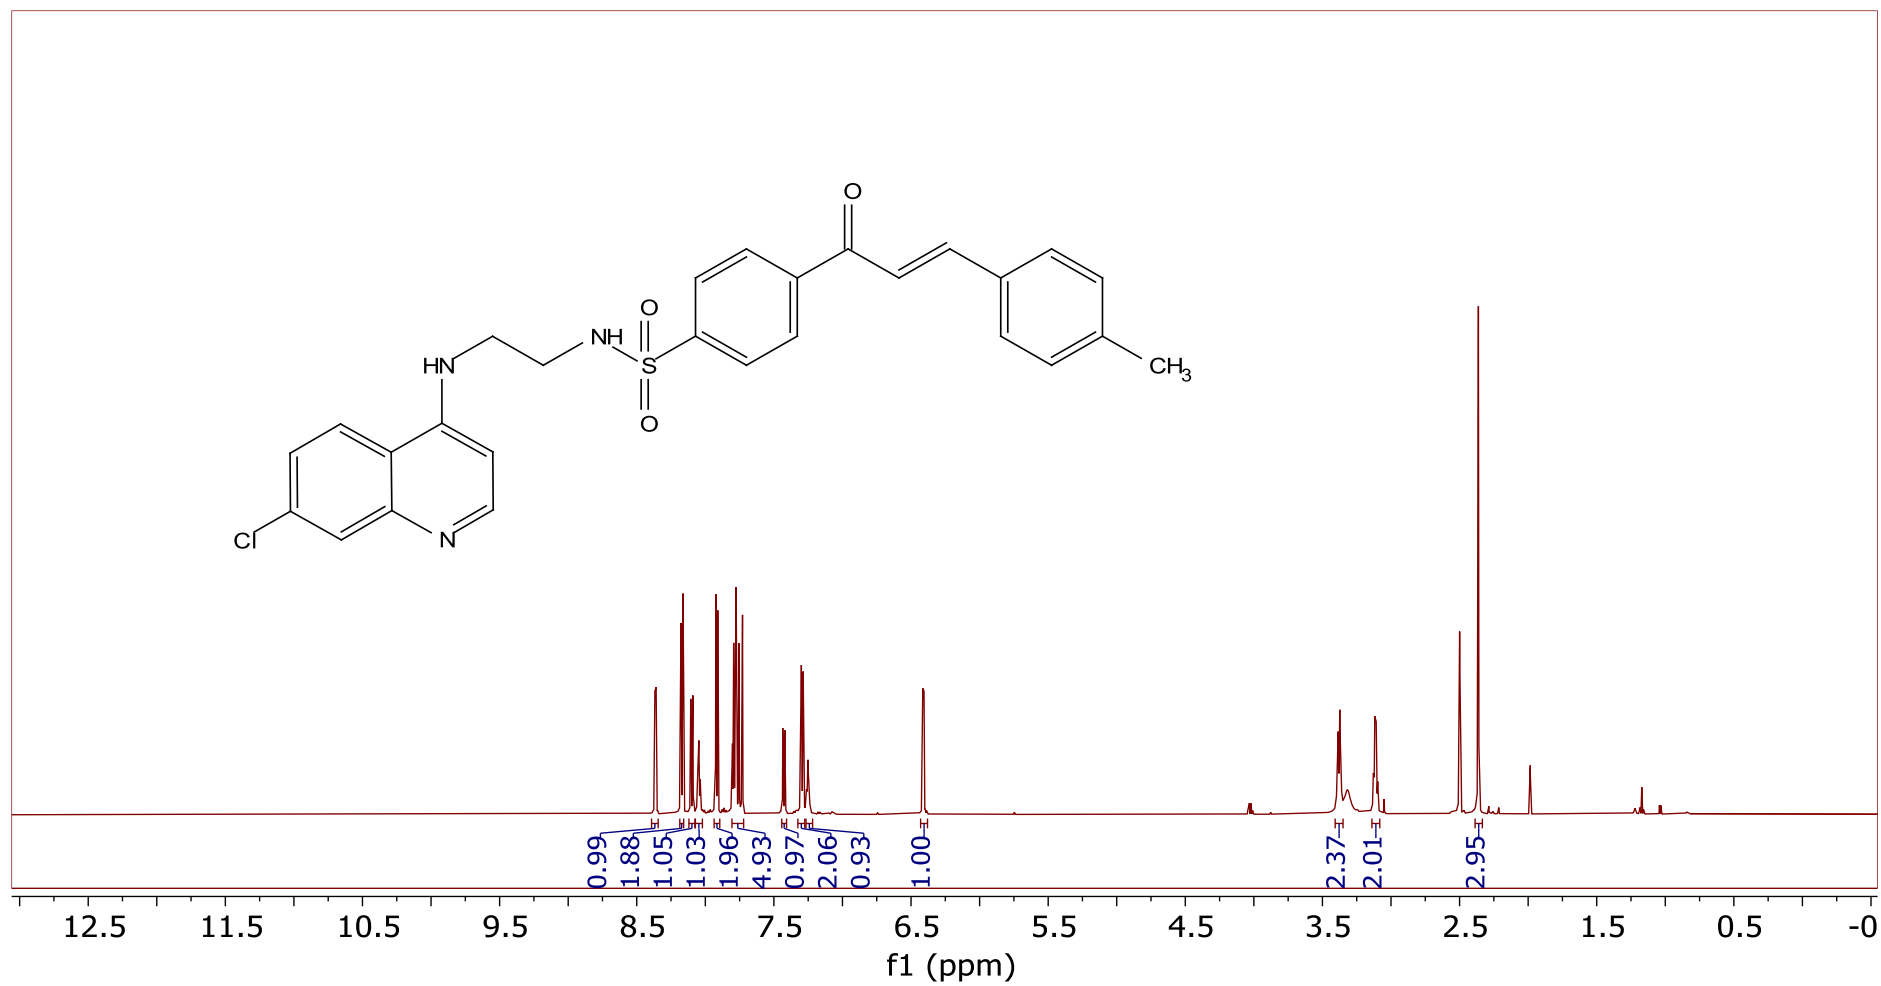

**S41:** <sup>1</sup>H NMR spectrum of *(E)*-*N*-(2-((7-chloroquinolin-4-yl)amino)ethyl)-4-(3-(*p*-tolyl)acryloyl)benzenesulfonamide **22**

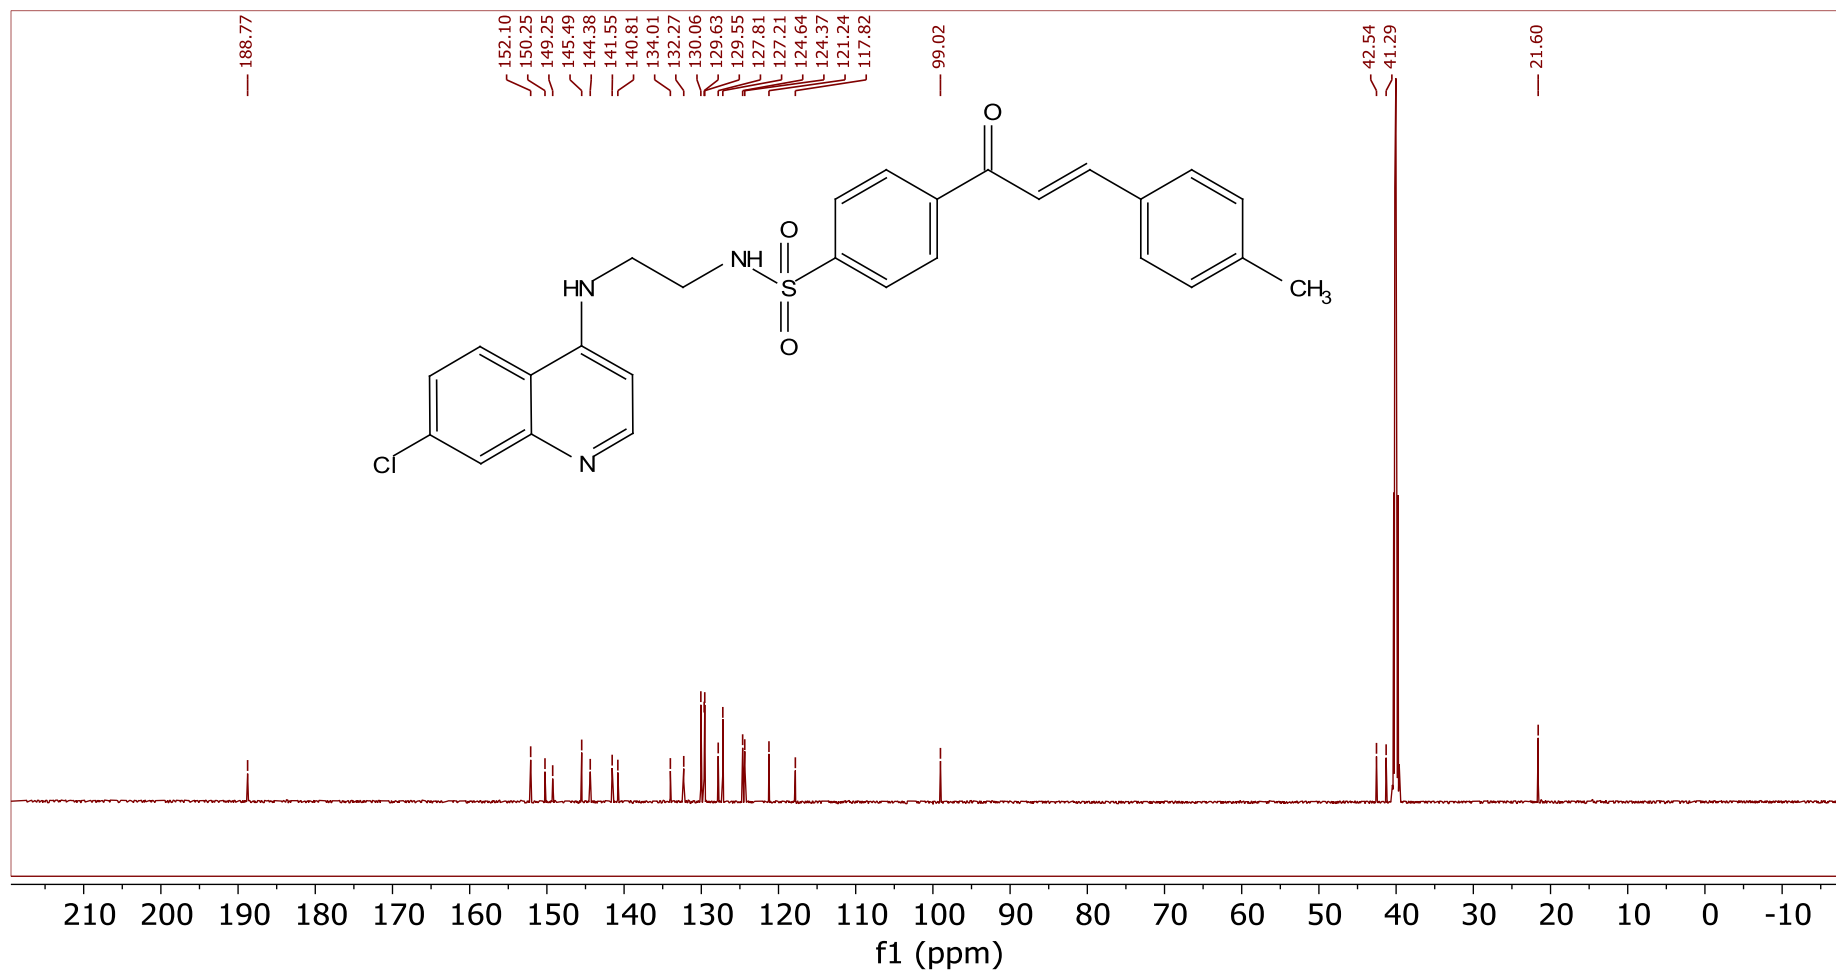

**S42:** <sup>13</sup>C NMR spectrum of (E)-N-(2-((7-chloroquinolin-4-yl)amino)ethyl)-4-(3-(p-tolyl)acryloyl)benzenesulfonamide **22**

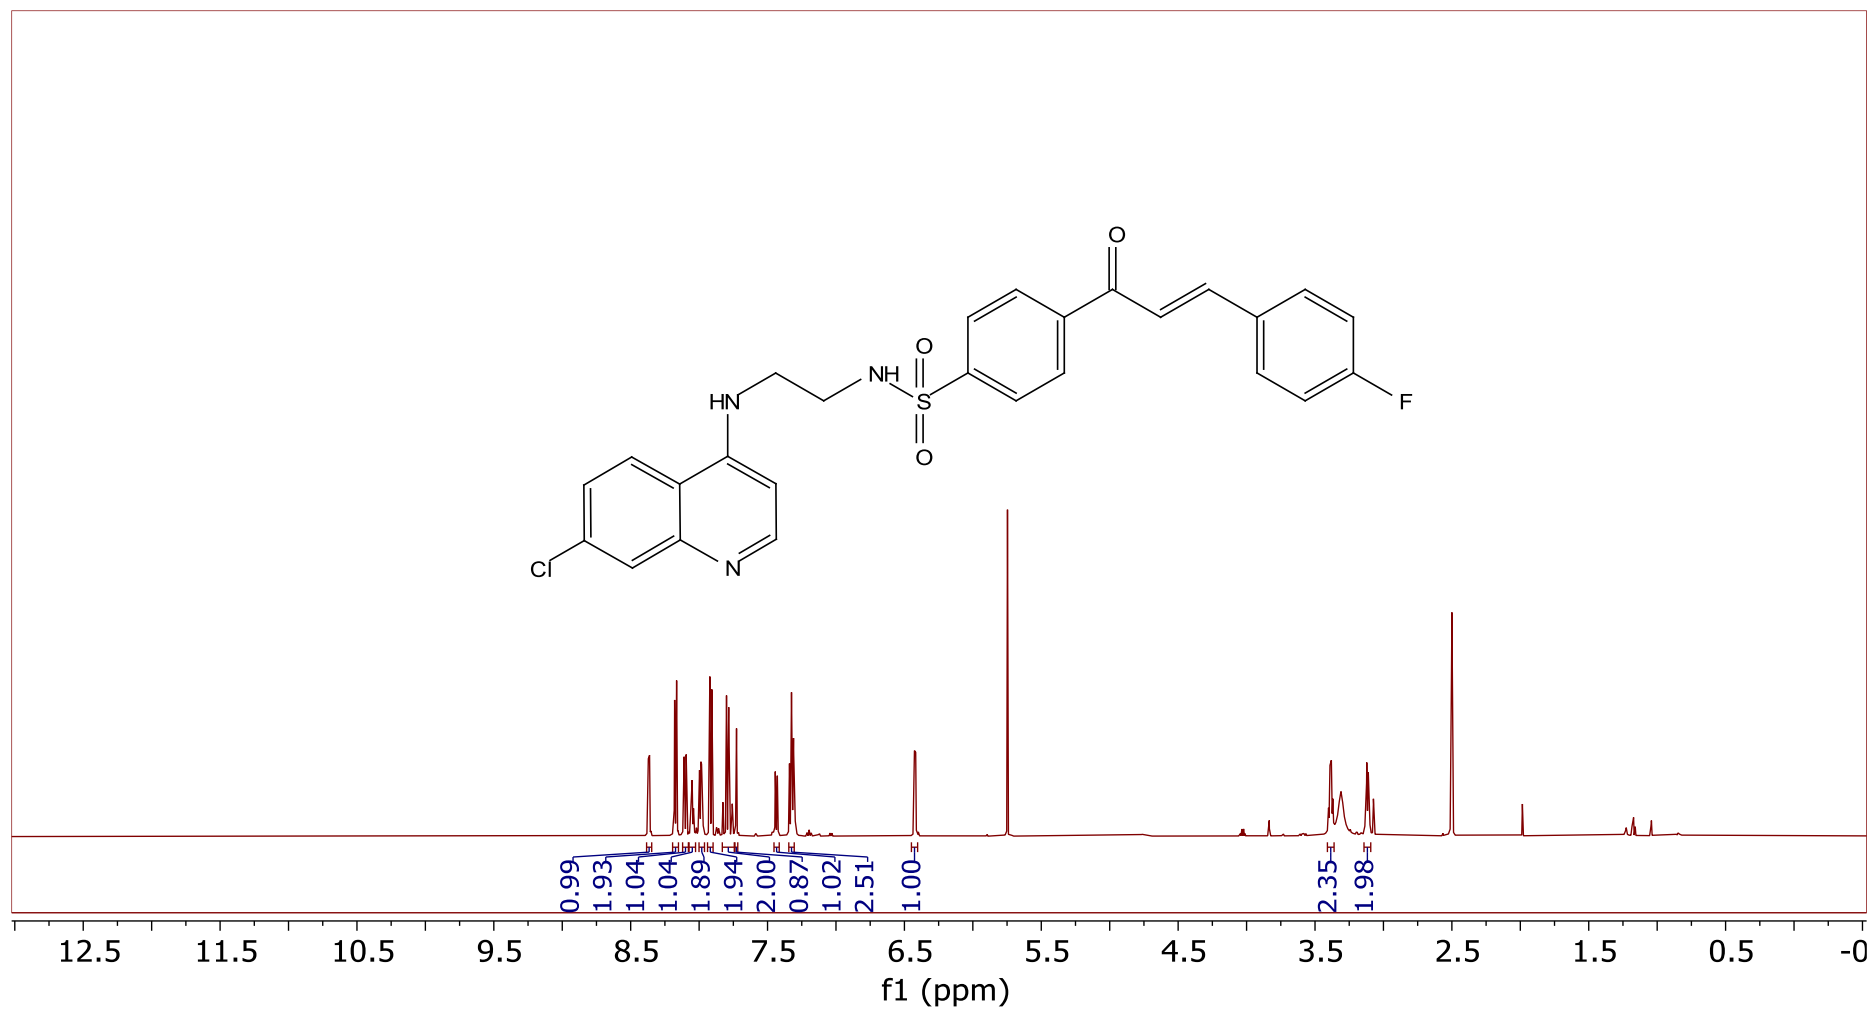

**S43:** <sup>1</sup>H NMR spectrum of (E)-N-(2-((7-chloroquinolin-4-yl)amino)ethyl)-4-(3-(4-fluorophenyl)acryloyl)benzenesulfonamide **24**

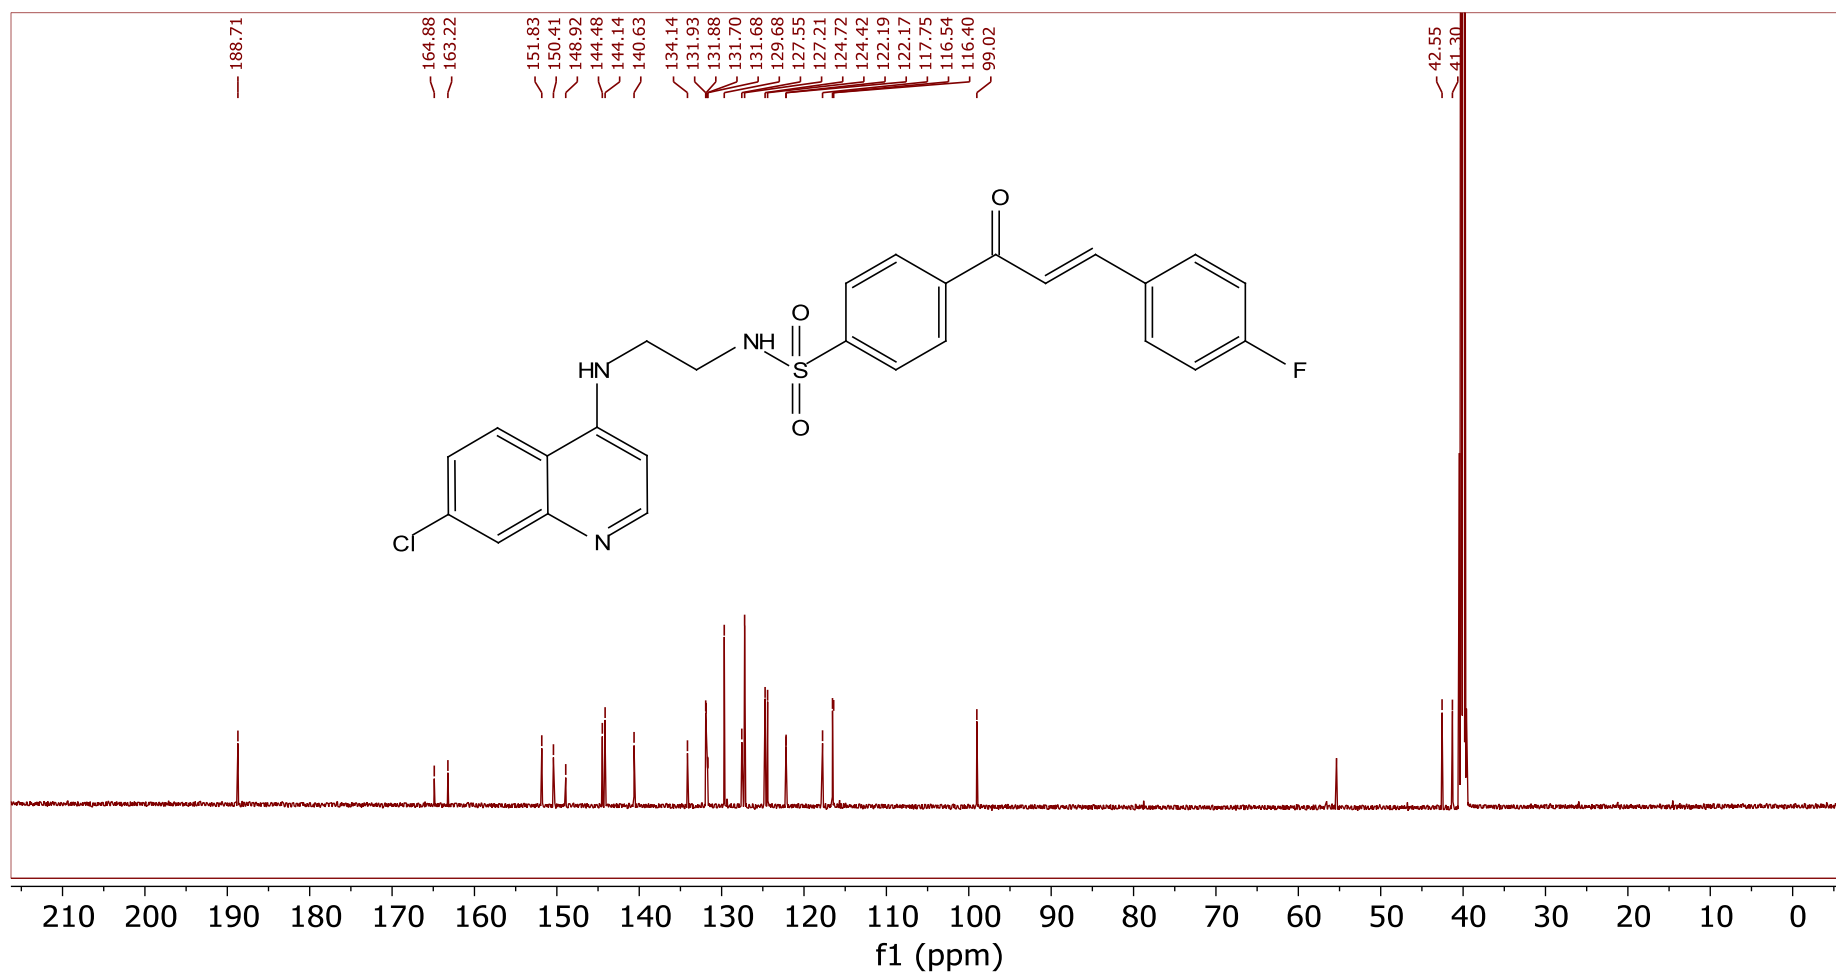

**S44:** <sup>13</sup>C NMR spectrum of (E)-N-(2-((7-chloroquinolin-4-yl)amino)ethyl)-4-(3-(4-fluorophenyl)acryloyl)benzenesulfonamide **24**

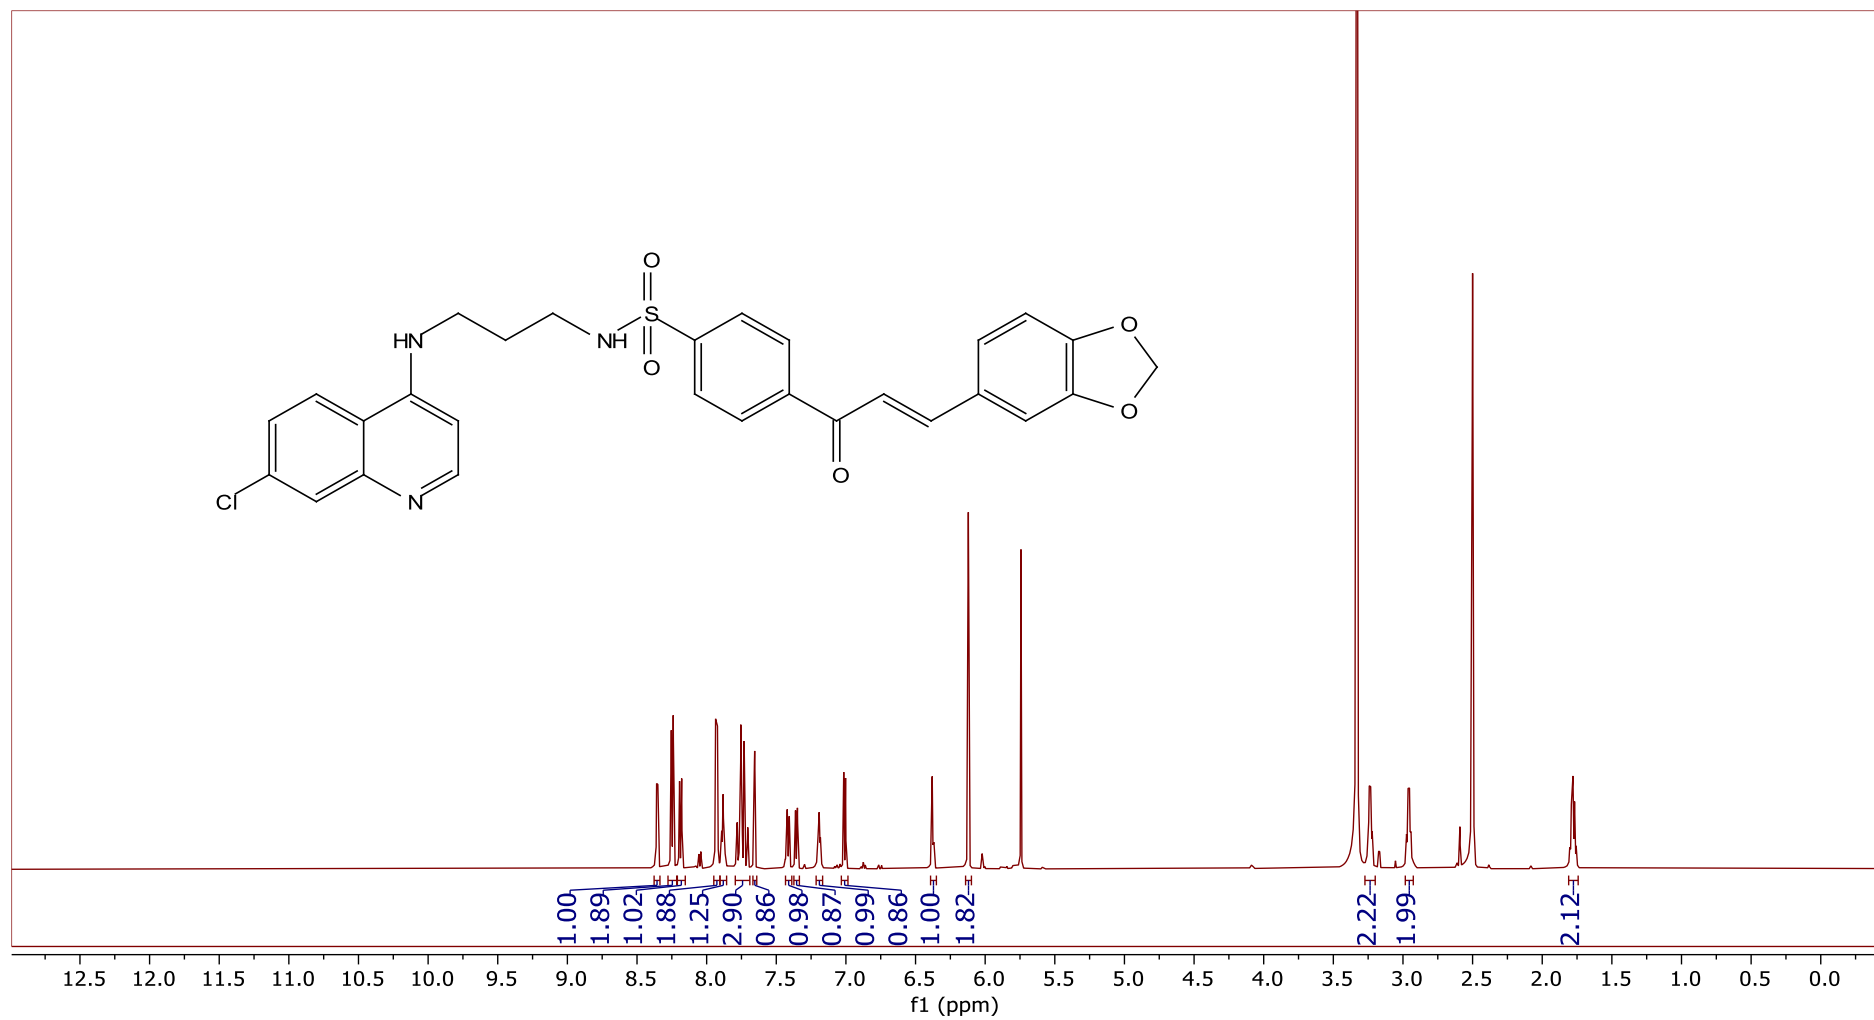

**S45:** <sup>1</sup>H NMR spectrum of *(E)*-4-(3-(Benzo[d][1,3]dioxol-5-yl)acryloyl)-*N*-(3-((7-chloroquinolin-4-yl)amino)propyl)benzenesulfonamide **26**

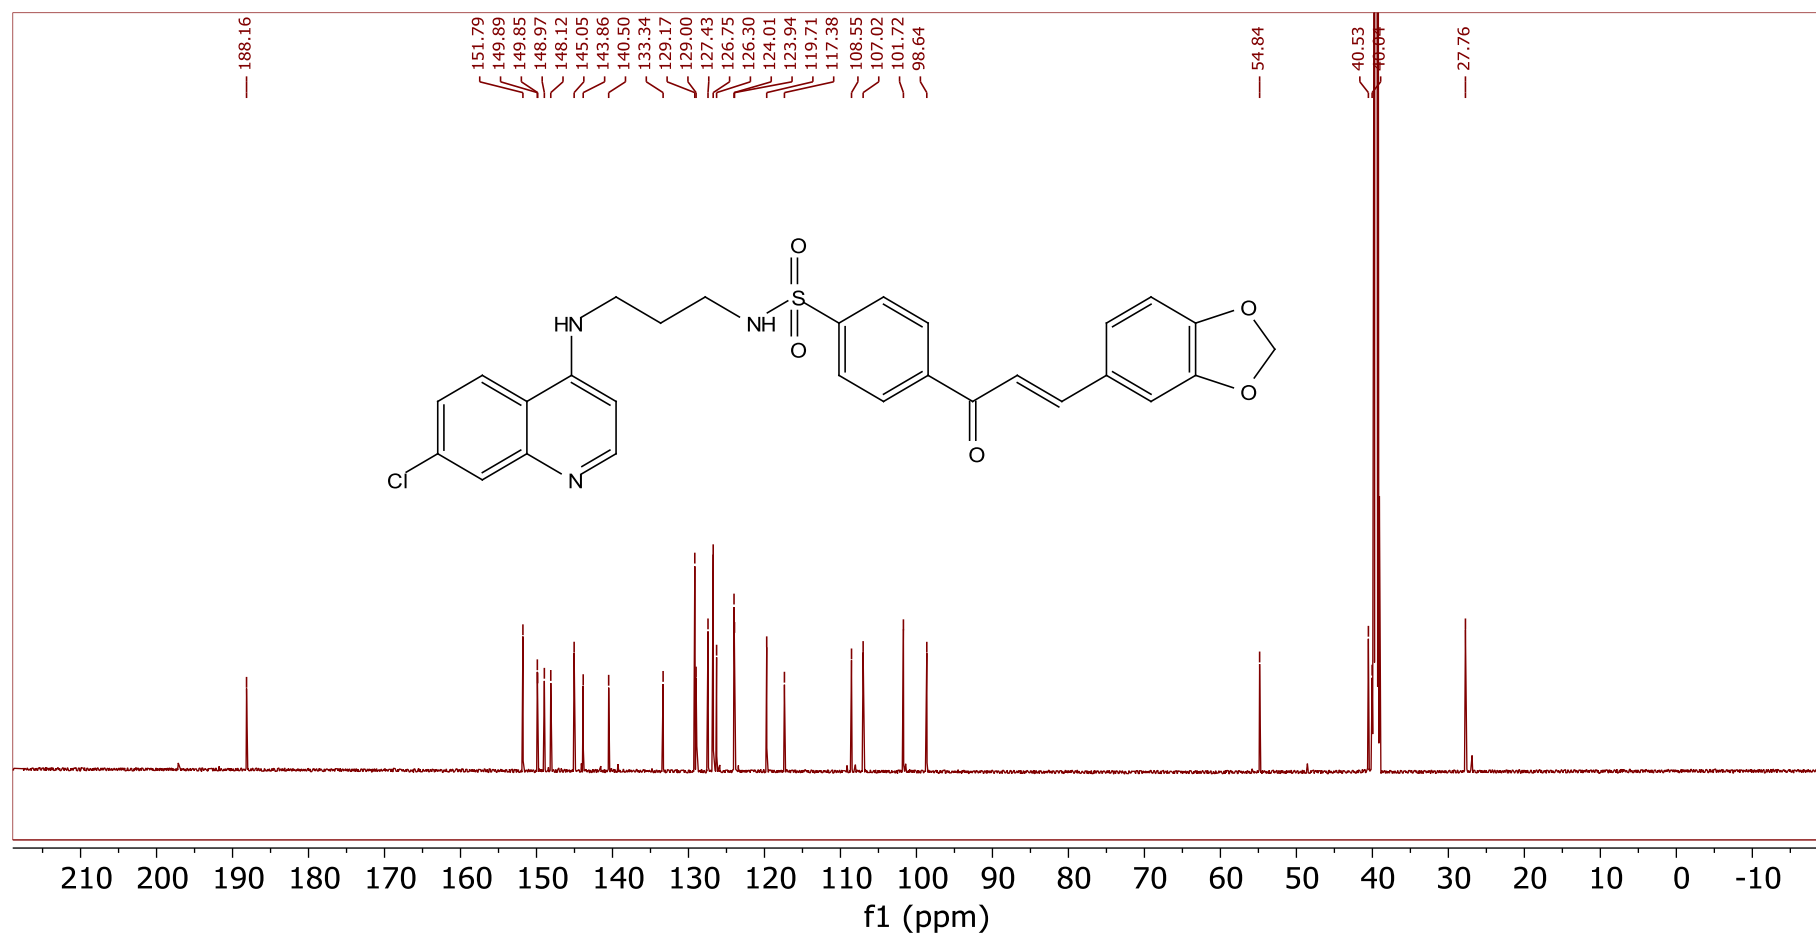

**S46:** <sup>13</sup>C NMR spectrum of *(E)*-4-(3-(Benzo[d][1,3]dioxol-5-yl)acryloyl)-*N*-(3-((7-chloroquinolin-4-yl)amino)propyl)benzenesulfonamide **26**

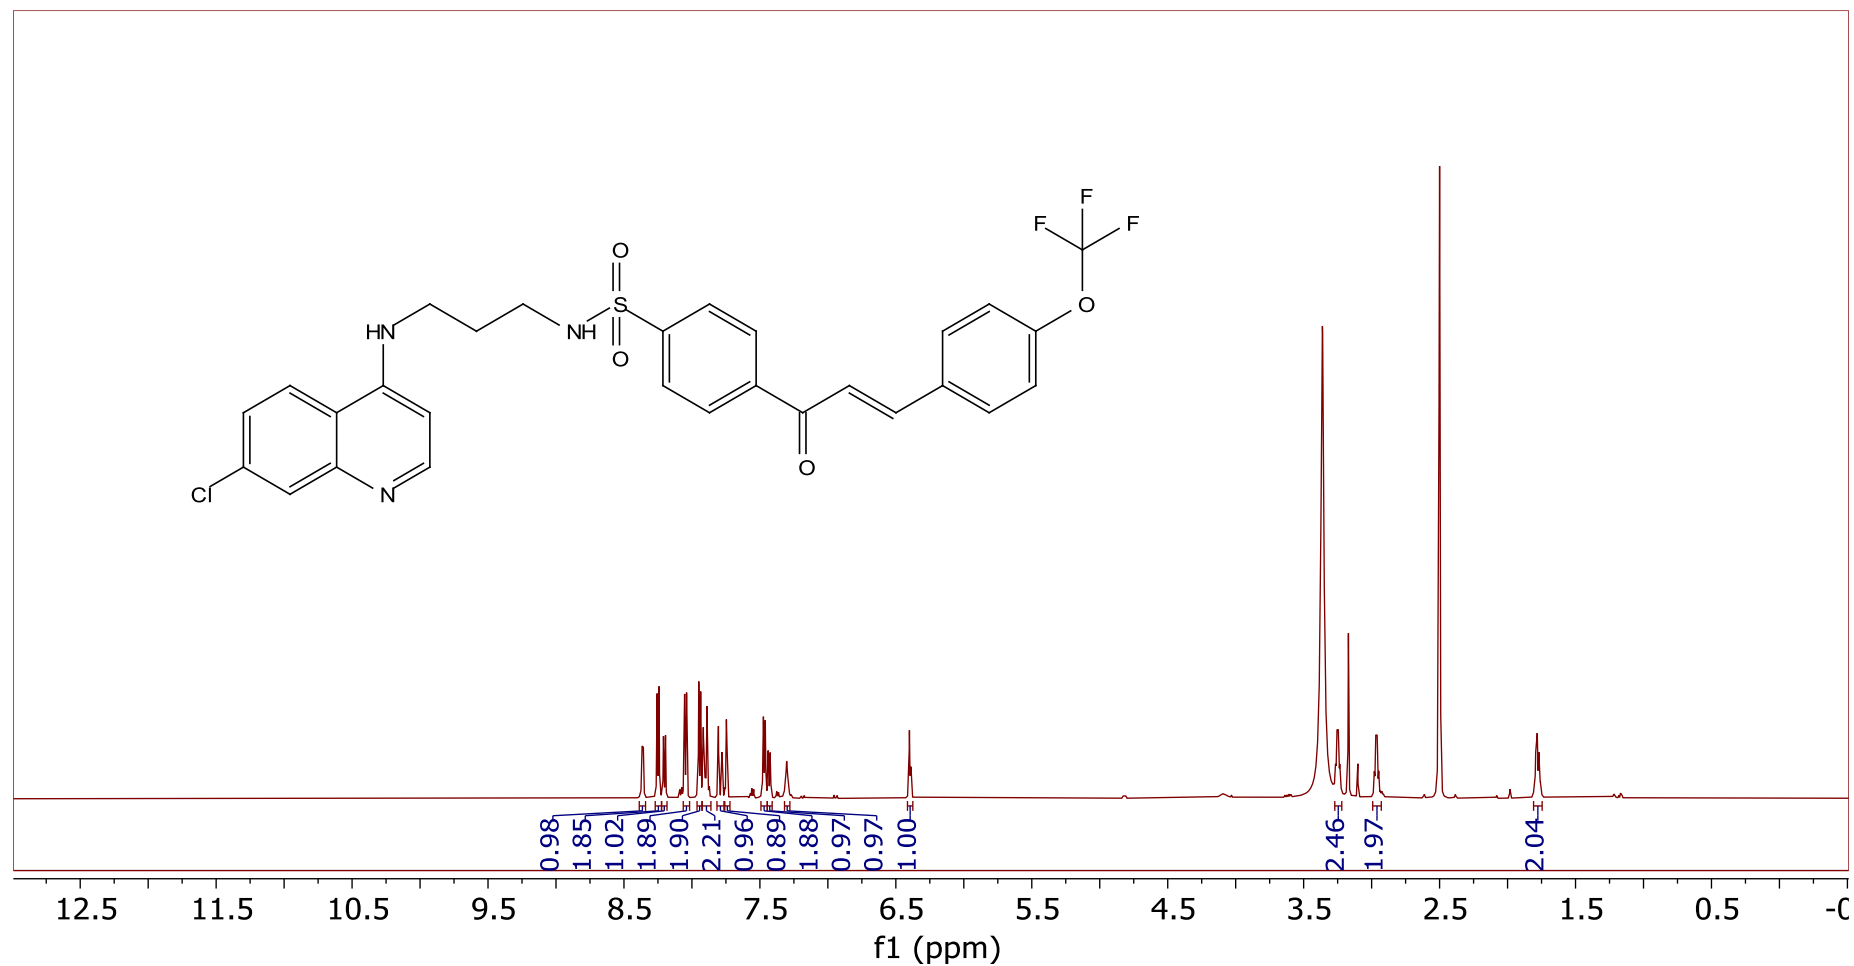

**S47:** <sup>1</sup>H NMR spectrum of *(E)*-N-(3-((7-chloroquinolin-4-yl)amino)propyl)-4-(3-(4-(trifluoromethoxy)phenyl)acryloyl)benzenesulfonamide **27**



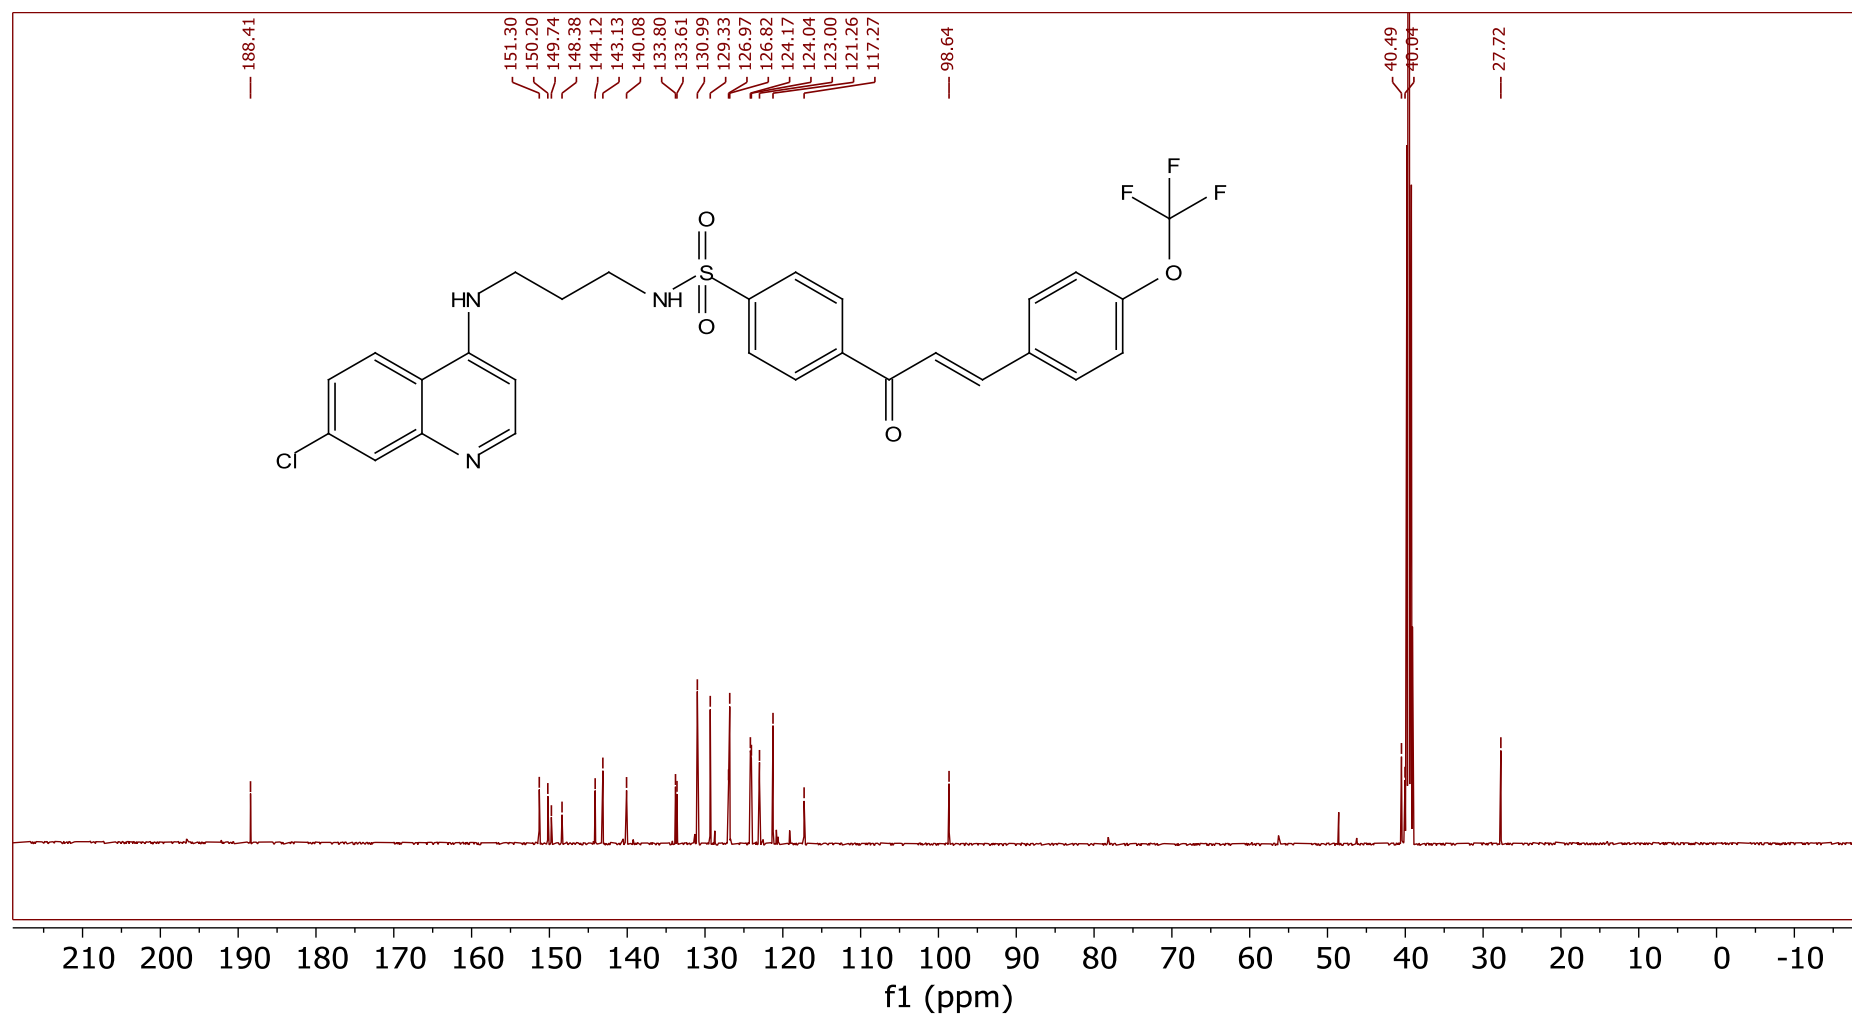

**S48:** <sup>13</sup>C NMR spectrum of (E)-N-(3-((7-Chloroquinolin-4-yl)amino)propyl)-4-(3-(4-(trifluoromethoxy)phenyl)acryloyl)benzenesulfonamide **27**

## HPLC of representative compounds

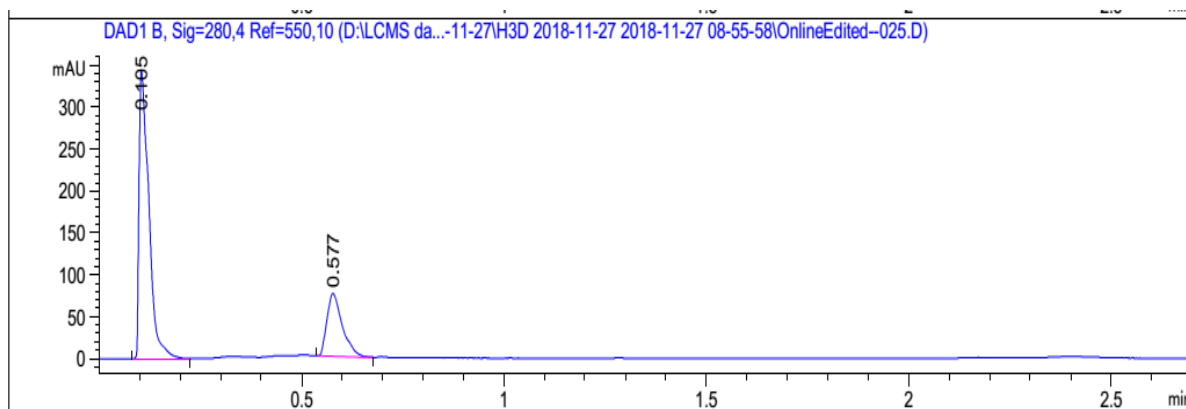

**S49:** HPLC chromatogram of **2**

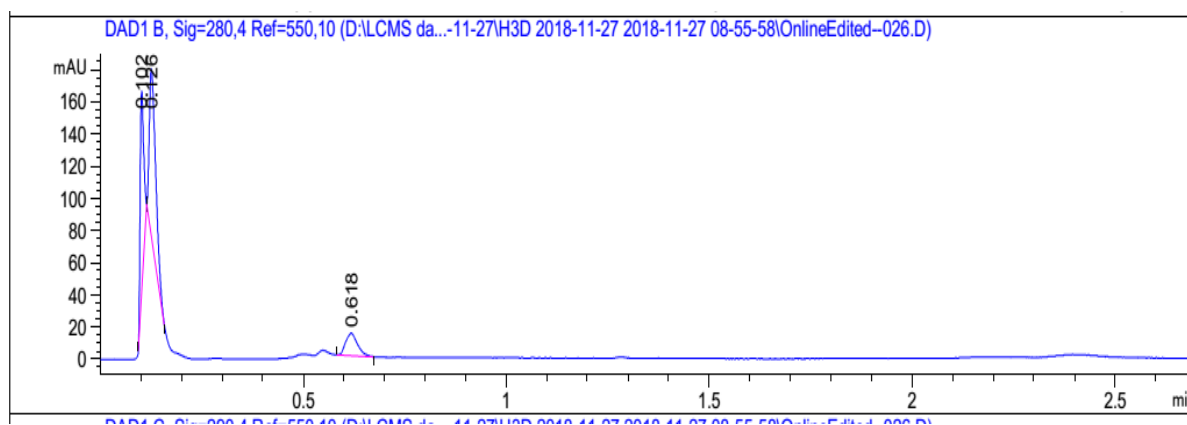

**S50:** HPLC chromatogram of **3**

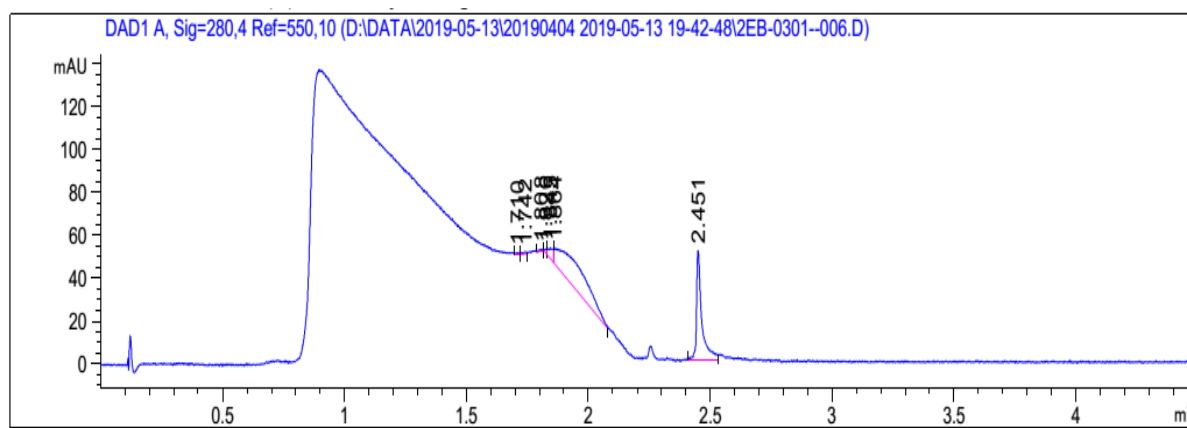

**S51:** HPLC chromatogram of **4**

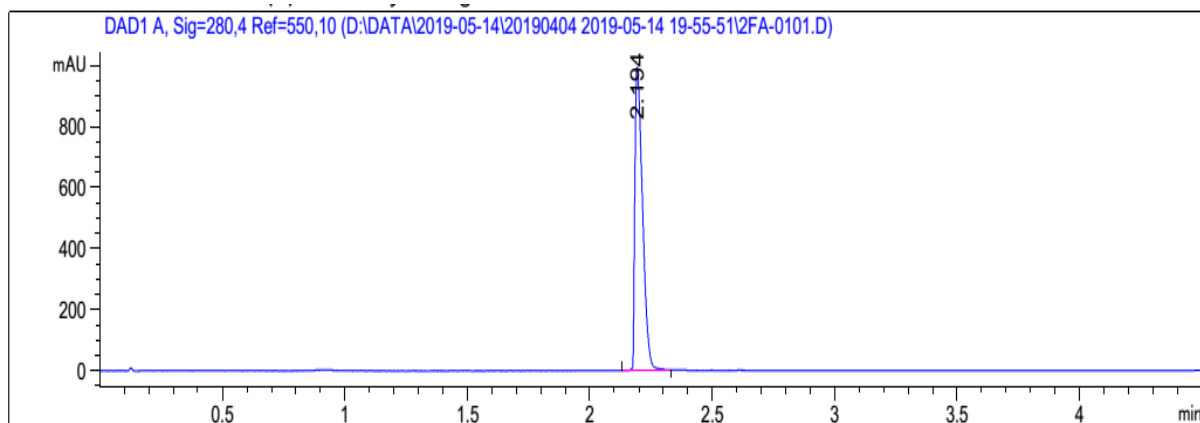

**S52:** HPLC chromatogram of **5**

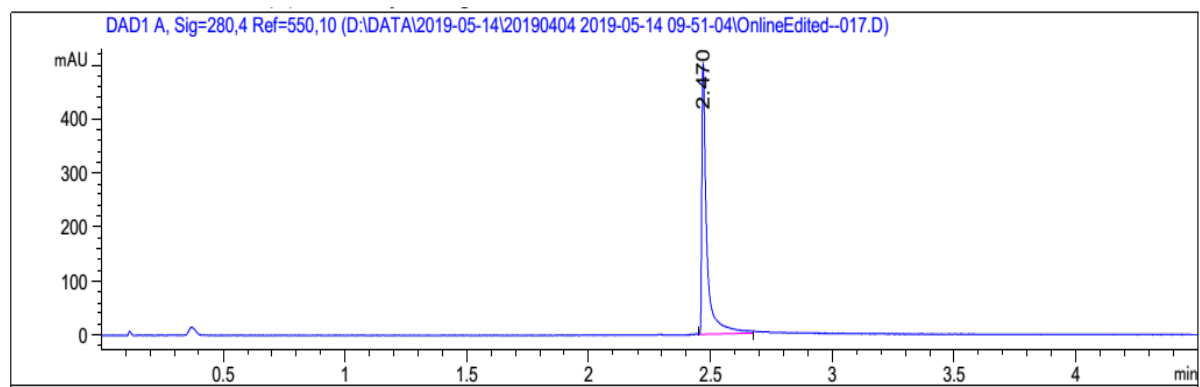

**S53:** HPLC chromatogram of **6**

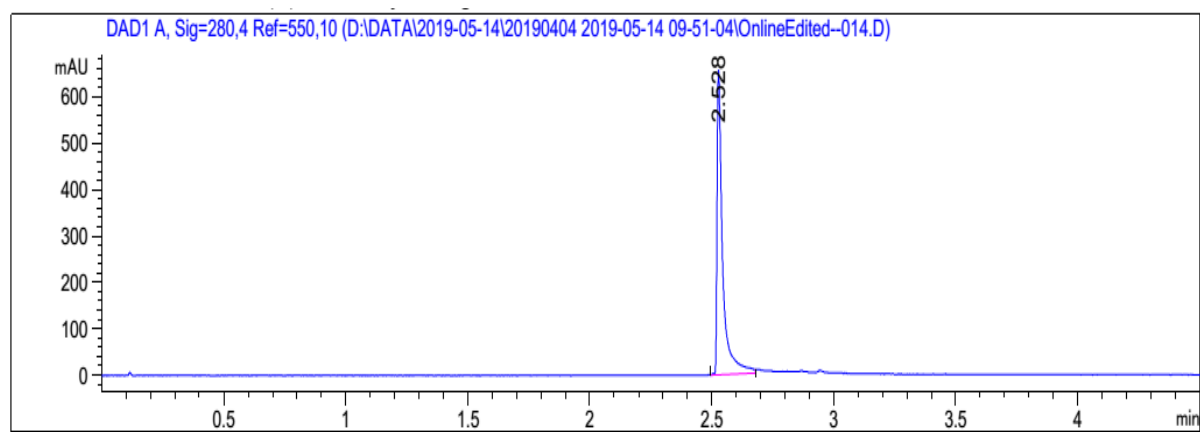

**S54:** HPLC chromatogram of **7**

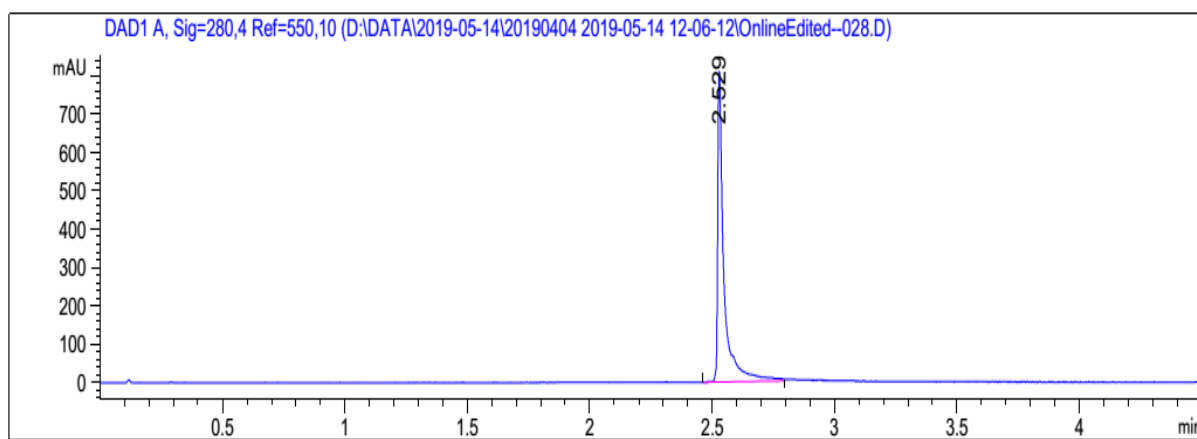

**S55:** HPLC chromatogram of **8**

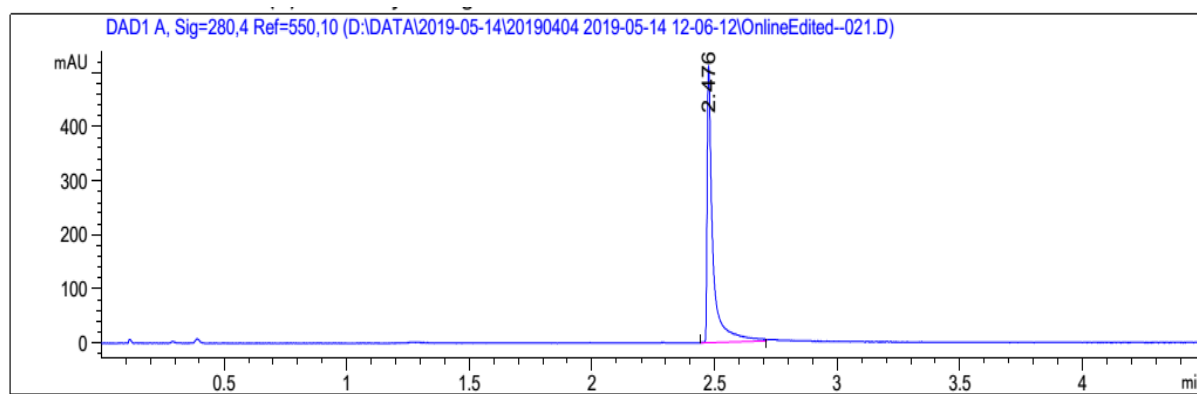

**S56:** HPLC chromatogram of **9**

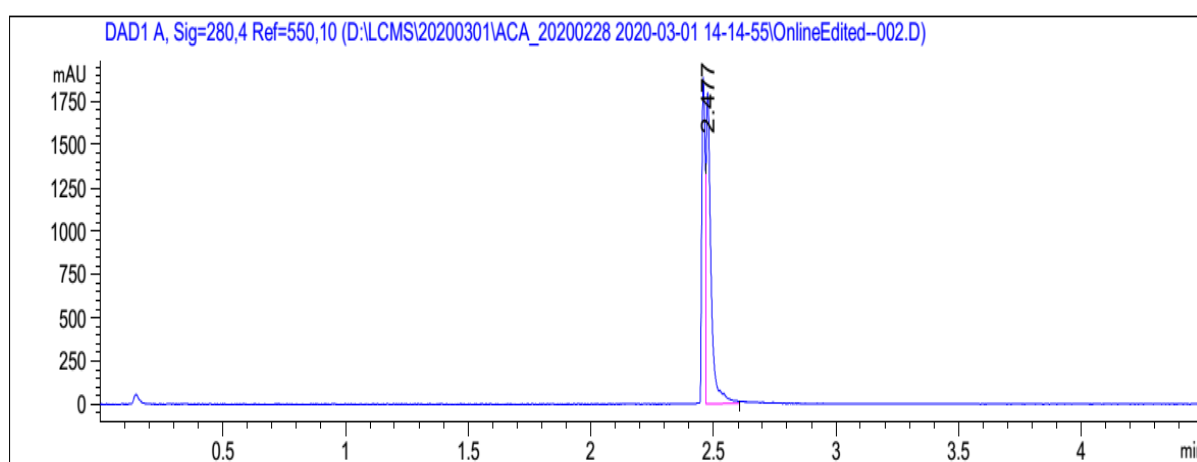

**S57:** HPLC chromatogram of **10**

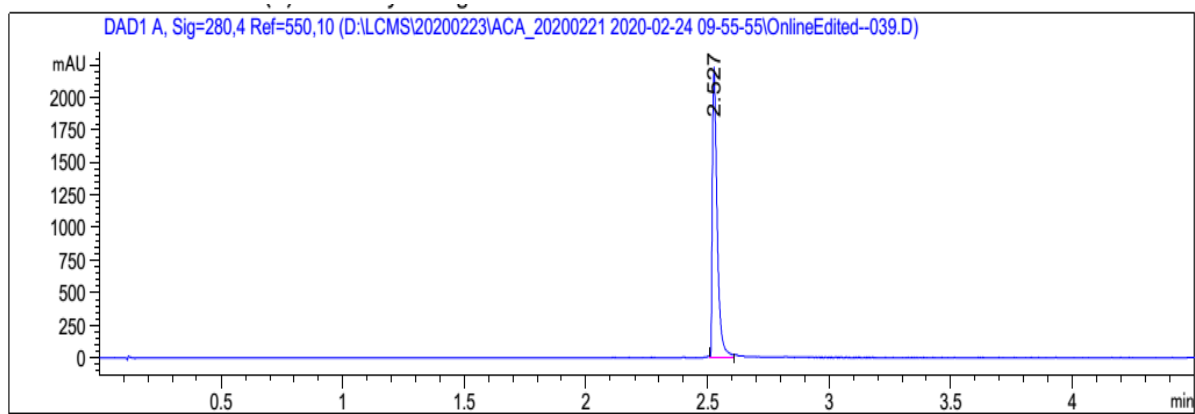

**S58:** HPLC chromatogram of **11**

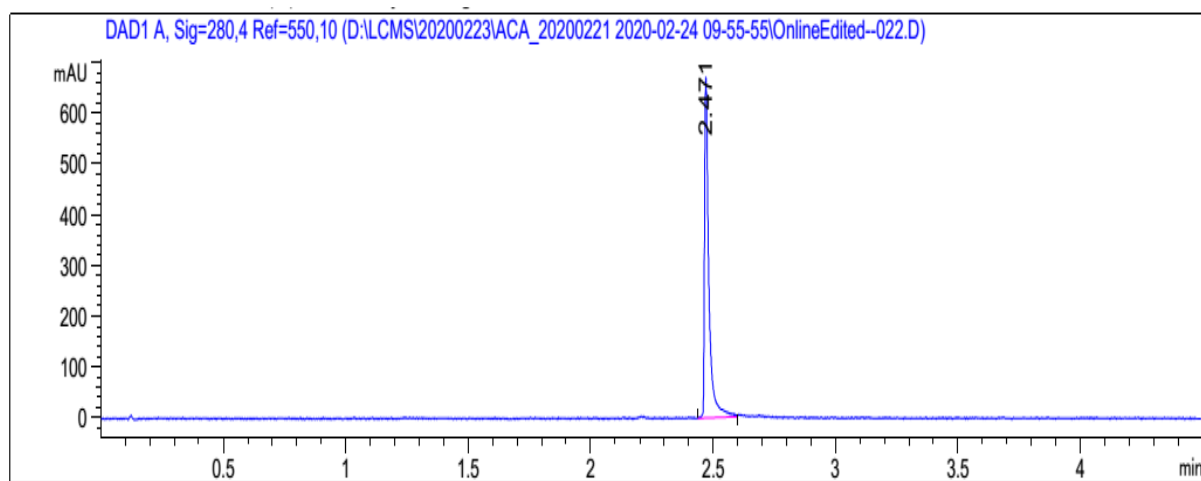

**S59:** HPLC chromatogram of **12**

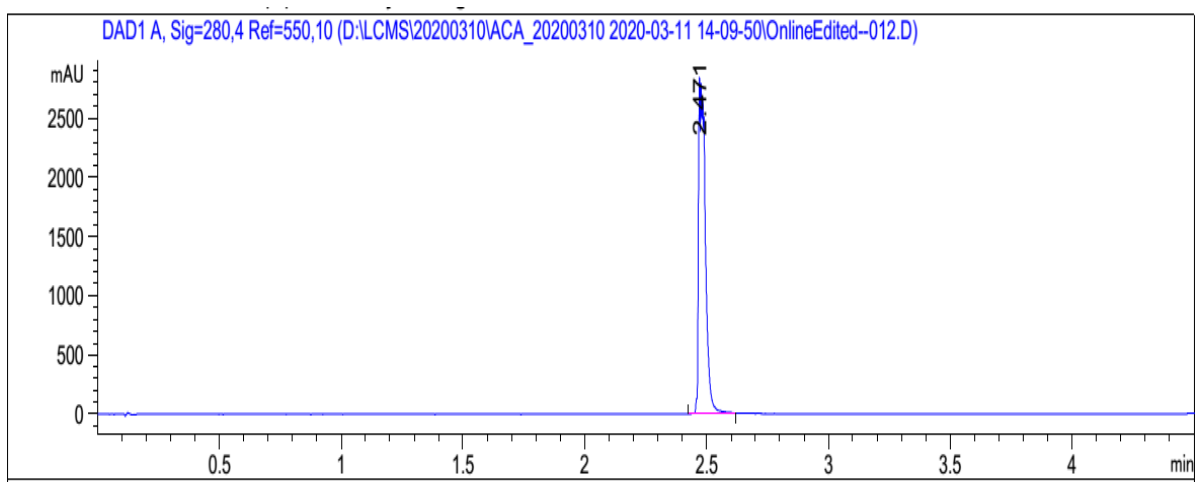

**S60:** HPLC chromatogram of **13**

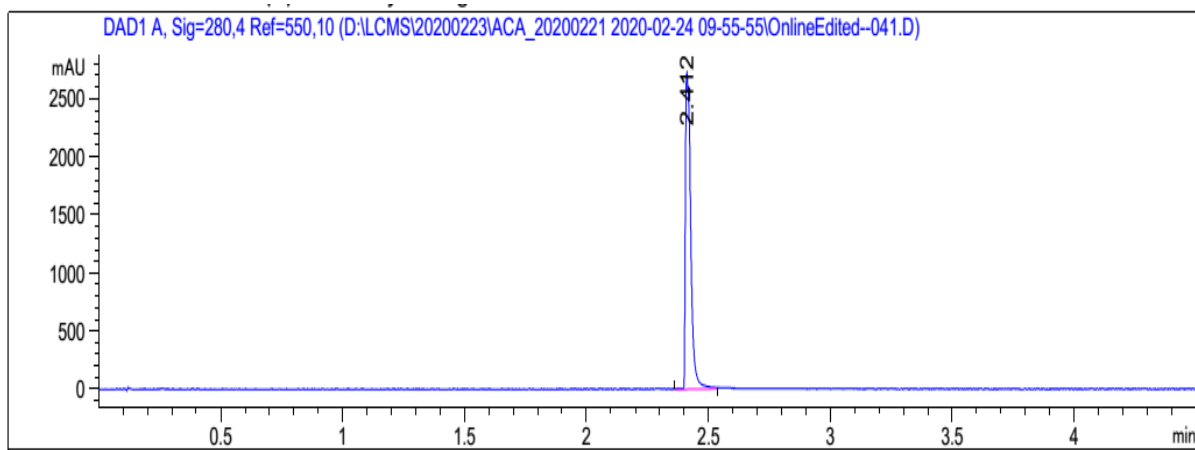

**S61:** HPLC chromatogram of **14**

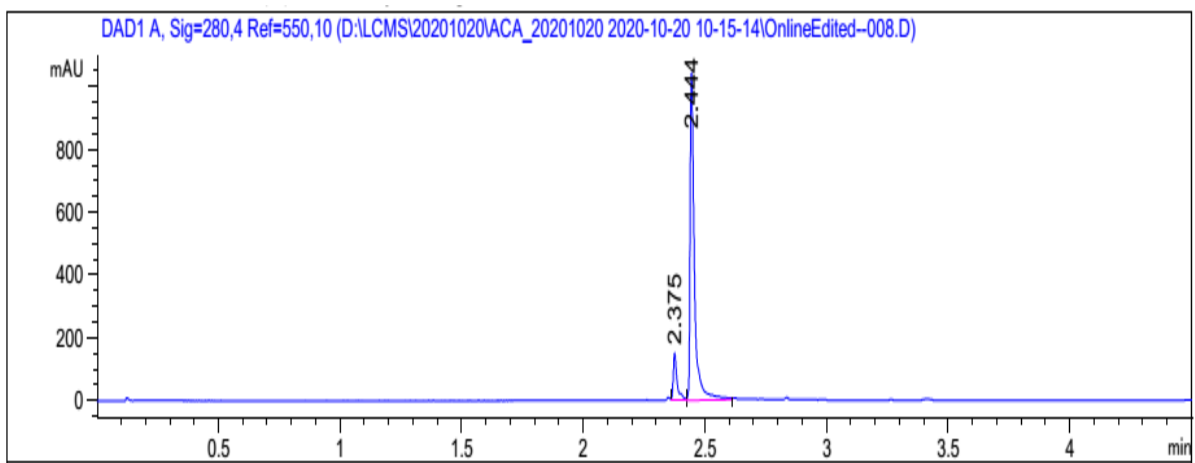

**S62:** HPLC chromatogram of **15**

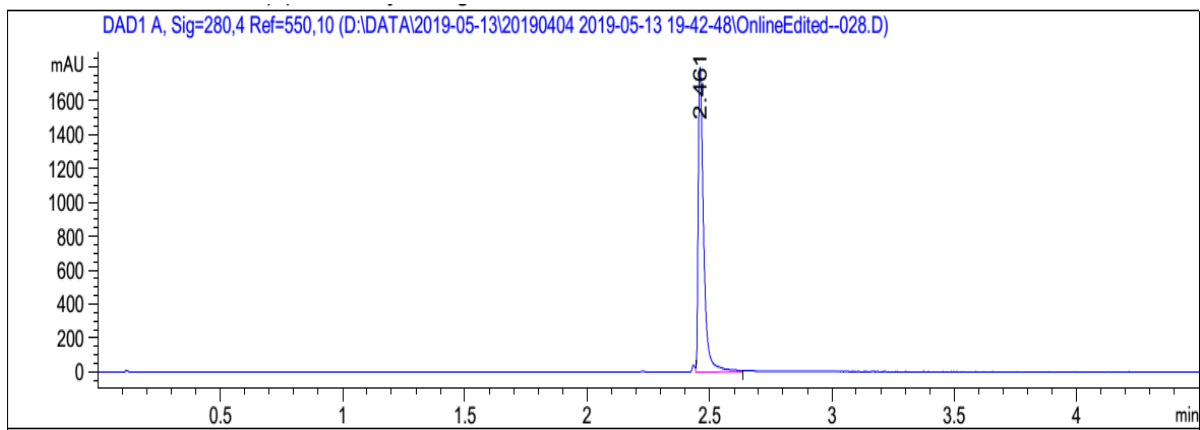

**S63:** HPLC chromatogram of **16**

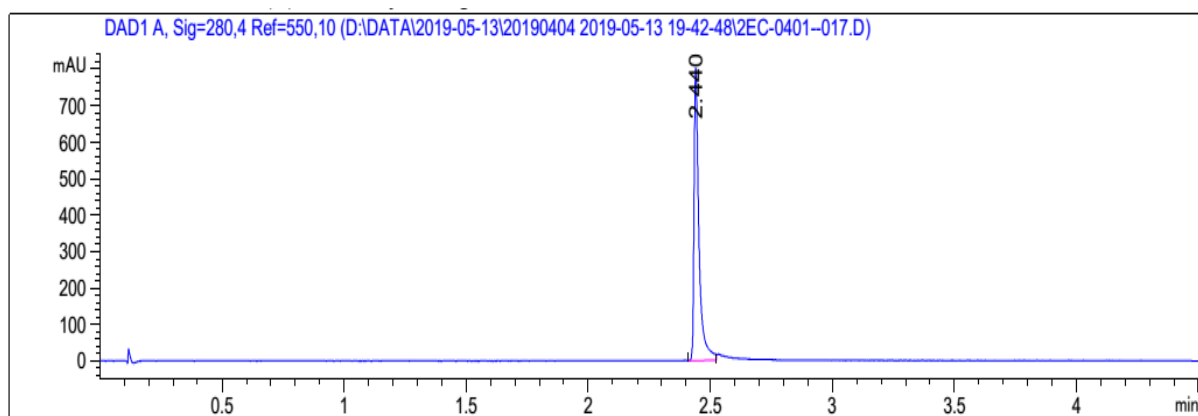

**S64:** HPLC chromatogram of **17**

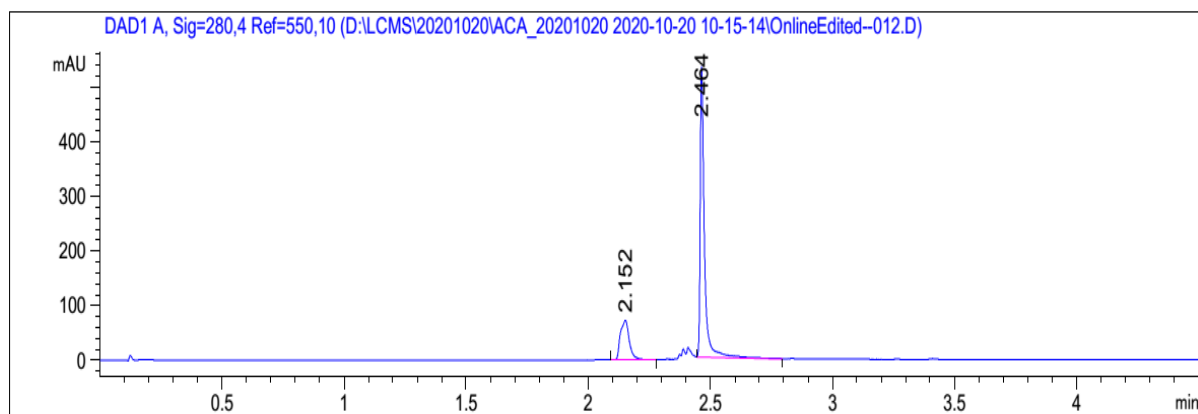

**S65:** HPLC chromatogram of **18**

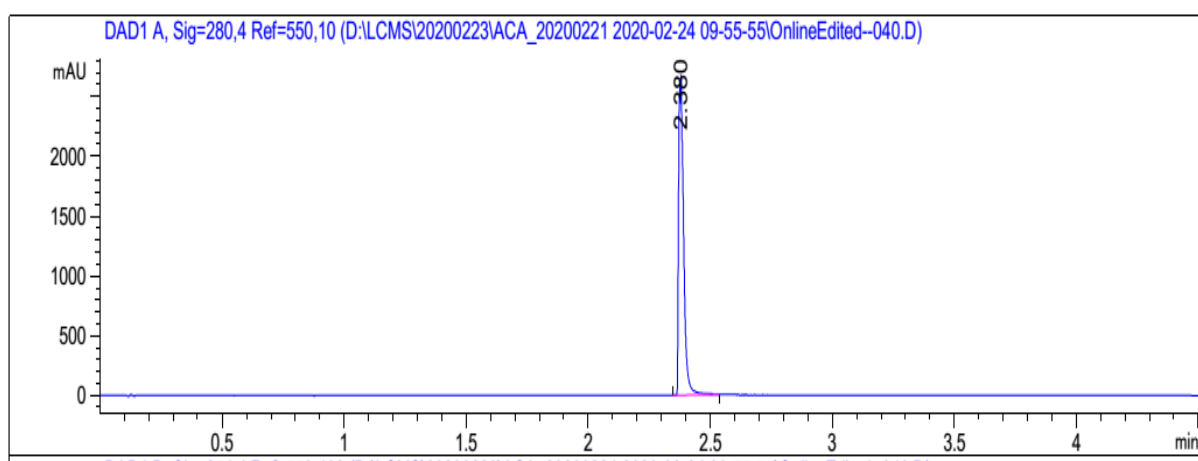

**S66:** HPLC chromatogram of **19**

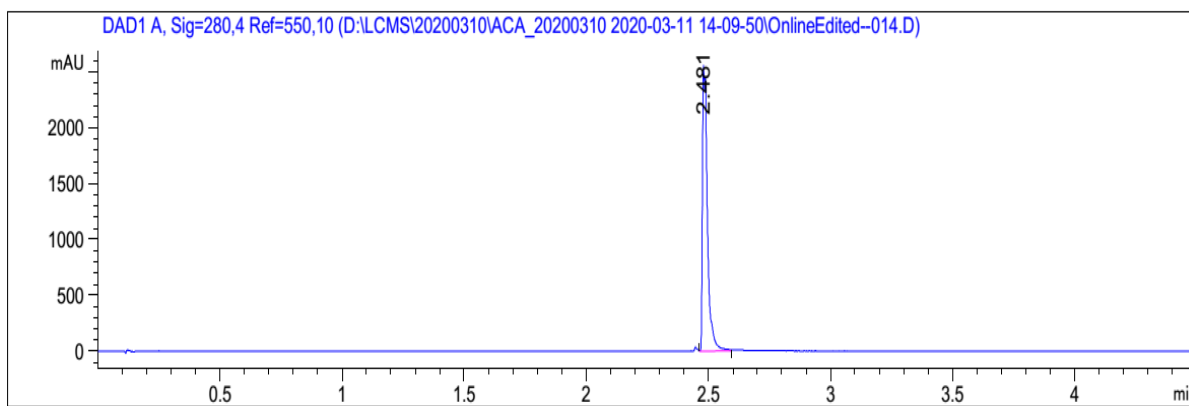

**S67:** HPLC chromatogram of **20**

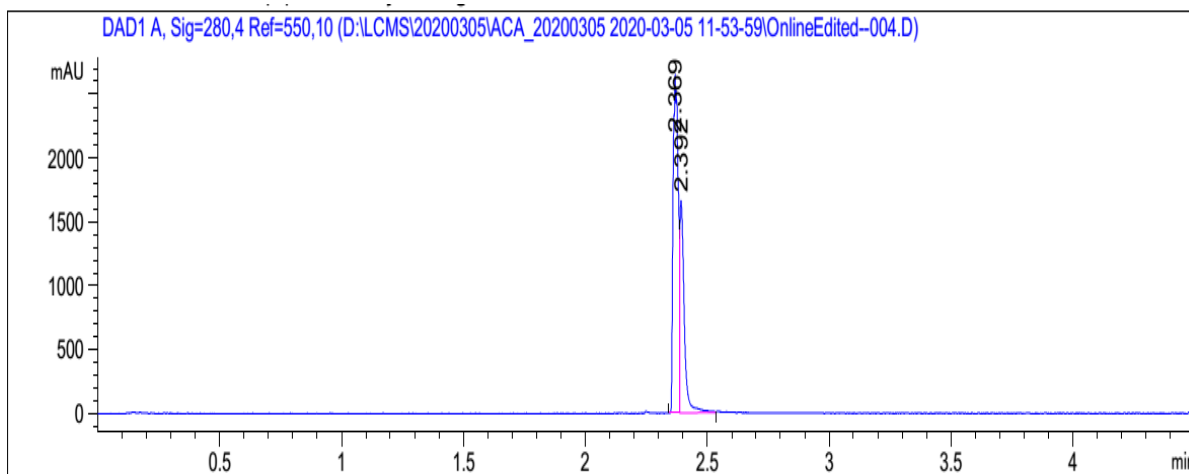

**S68:** HPLC chromatogram of **21**

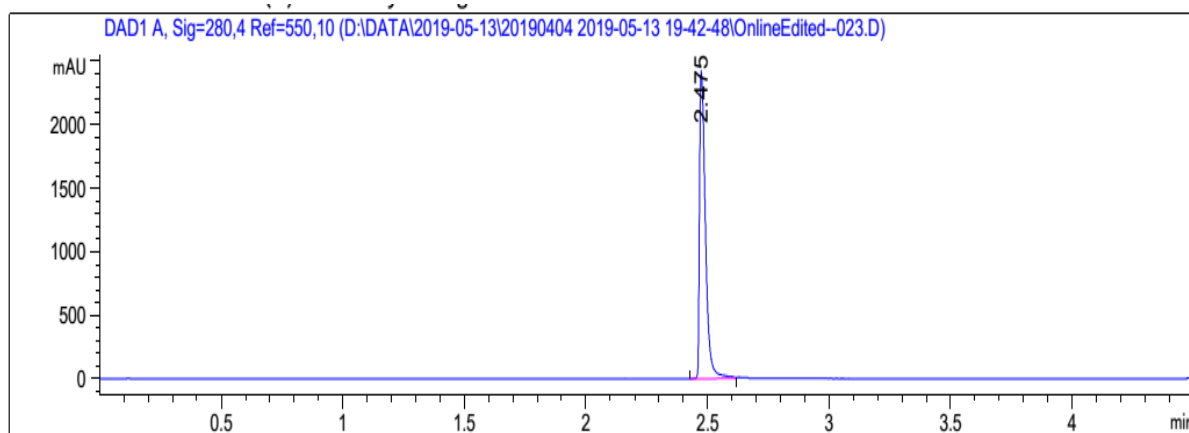

**S69:** HPLC chromatogram of **22**



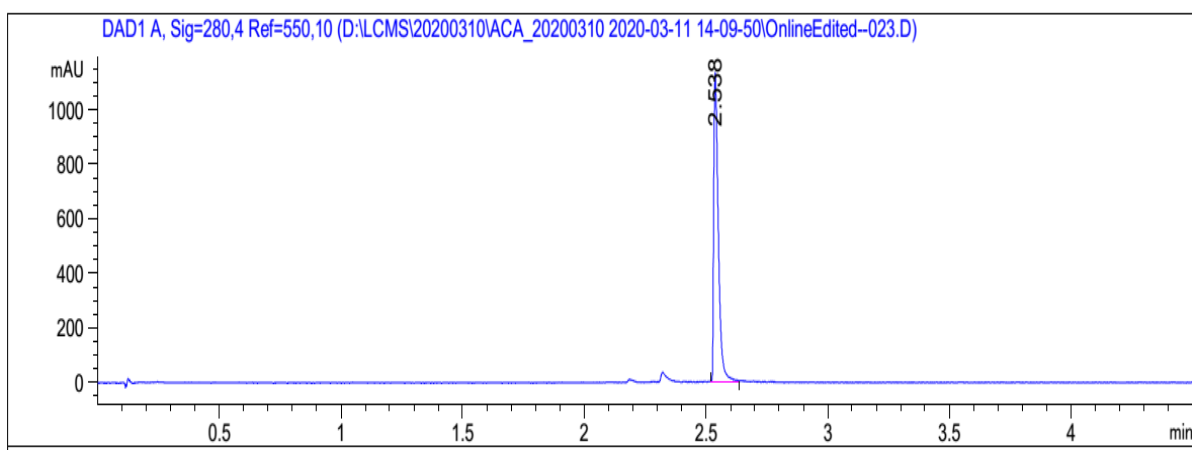

**S70:** HPLC chromatogram of **23**

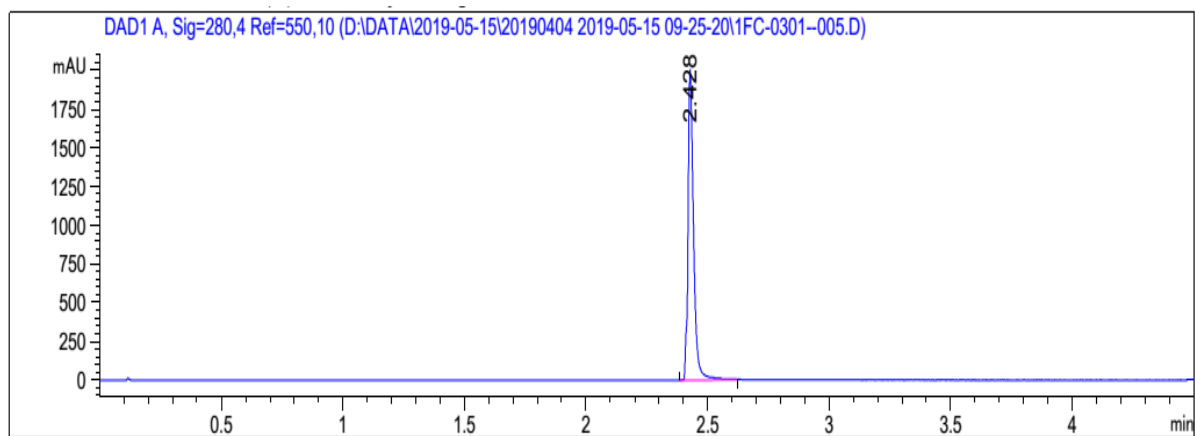

**S71:** HPLC chromatogram of **24**

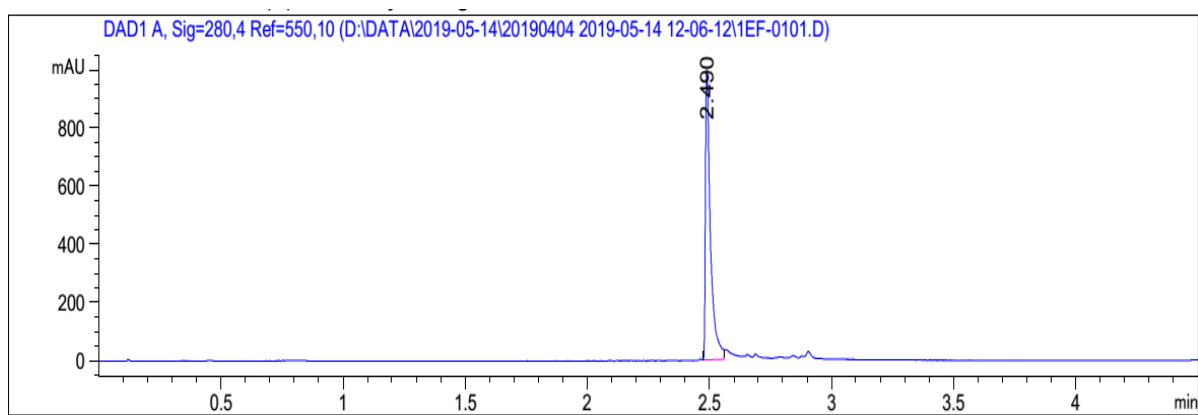

**S72:** HPLC chromatogram of **25**

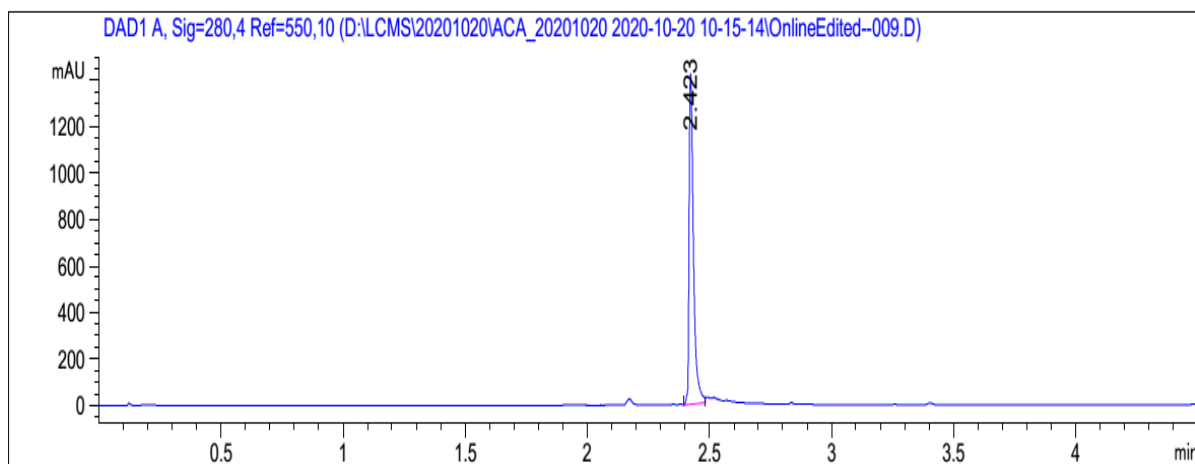

**S73:** HPLC chromatogram of **26**

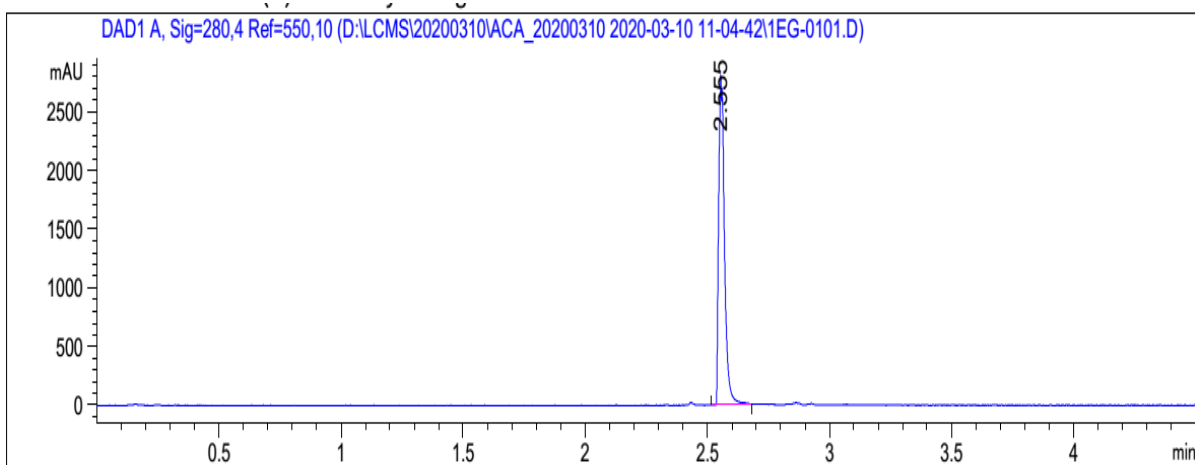

**S74:** HPLC chromatogram of **27**

## MS Spectra of representative compounds

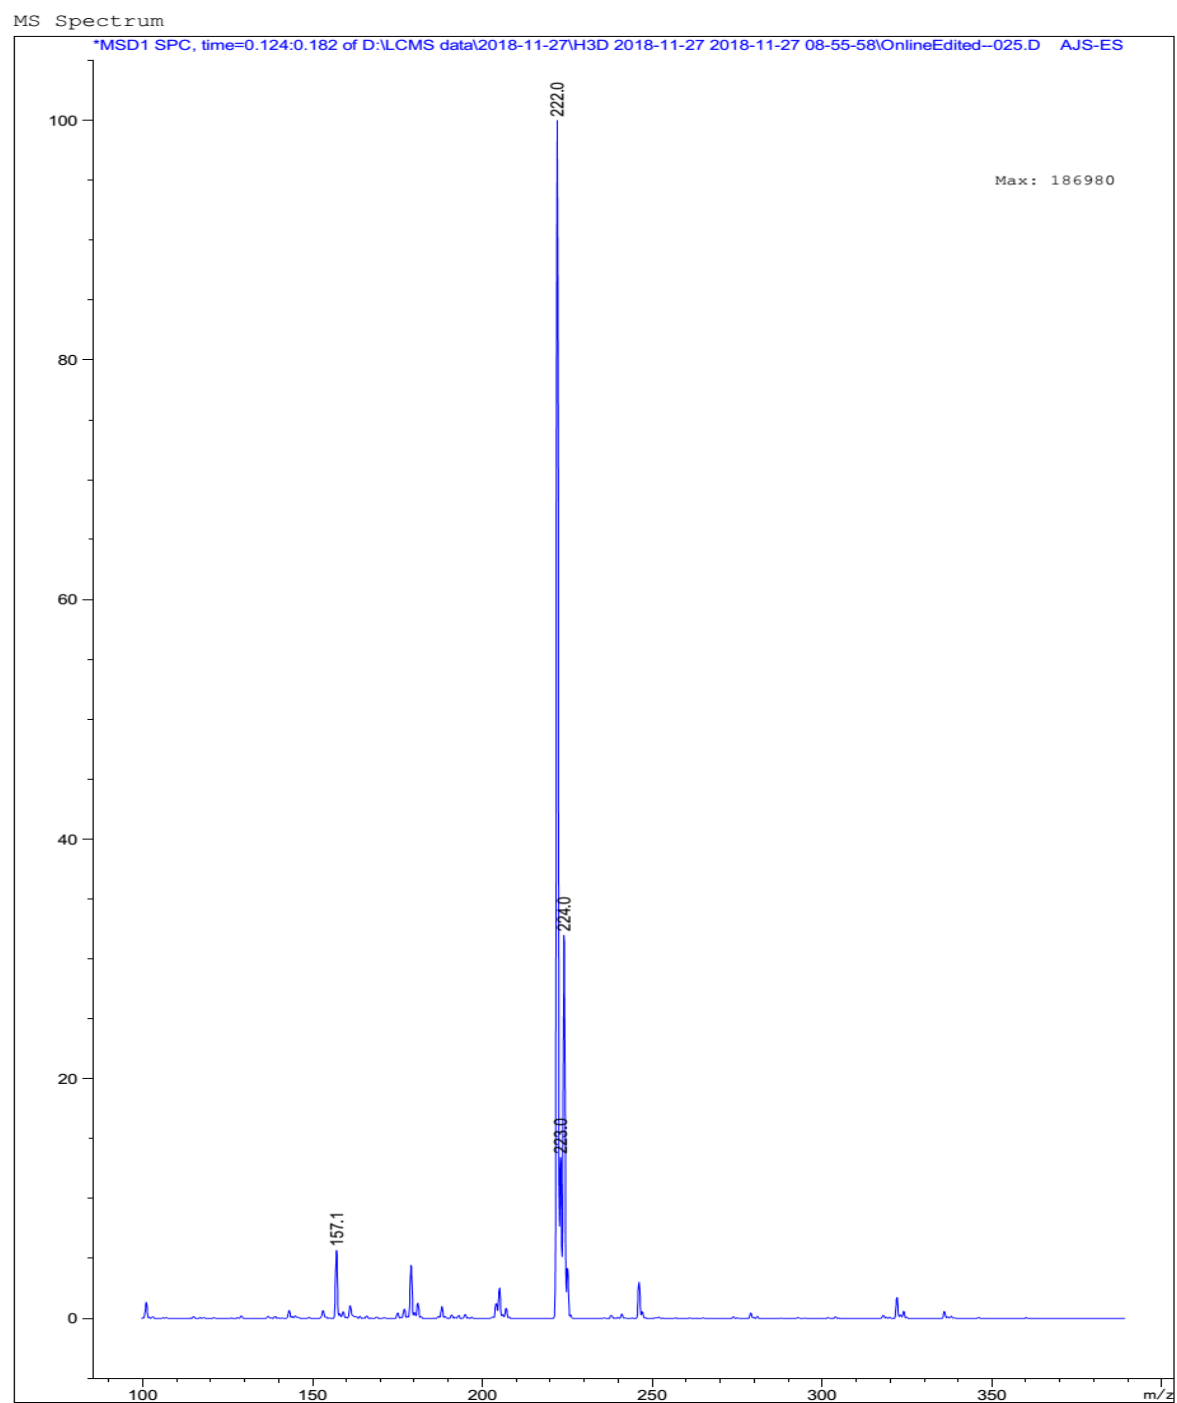

**S75:** HPLC-MS of **2**

MS Spectrum

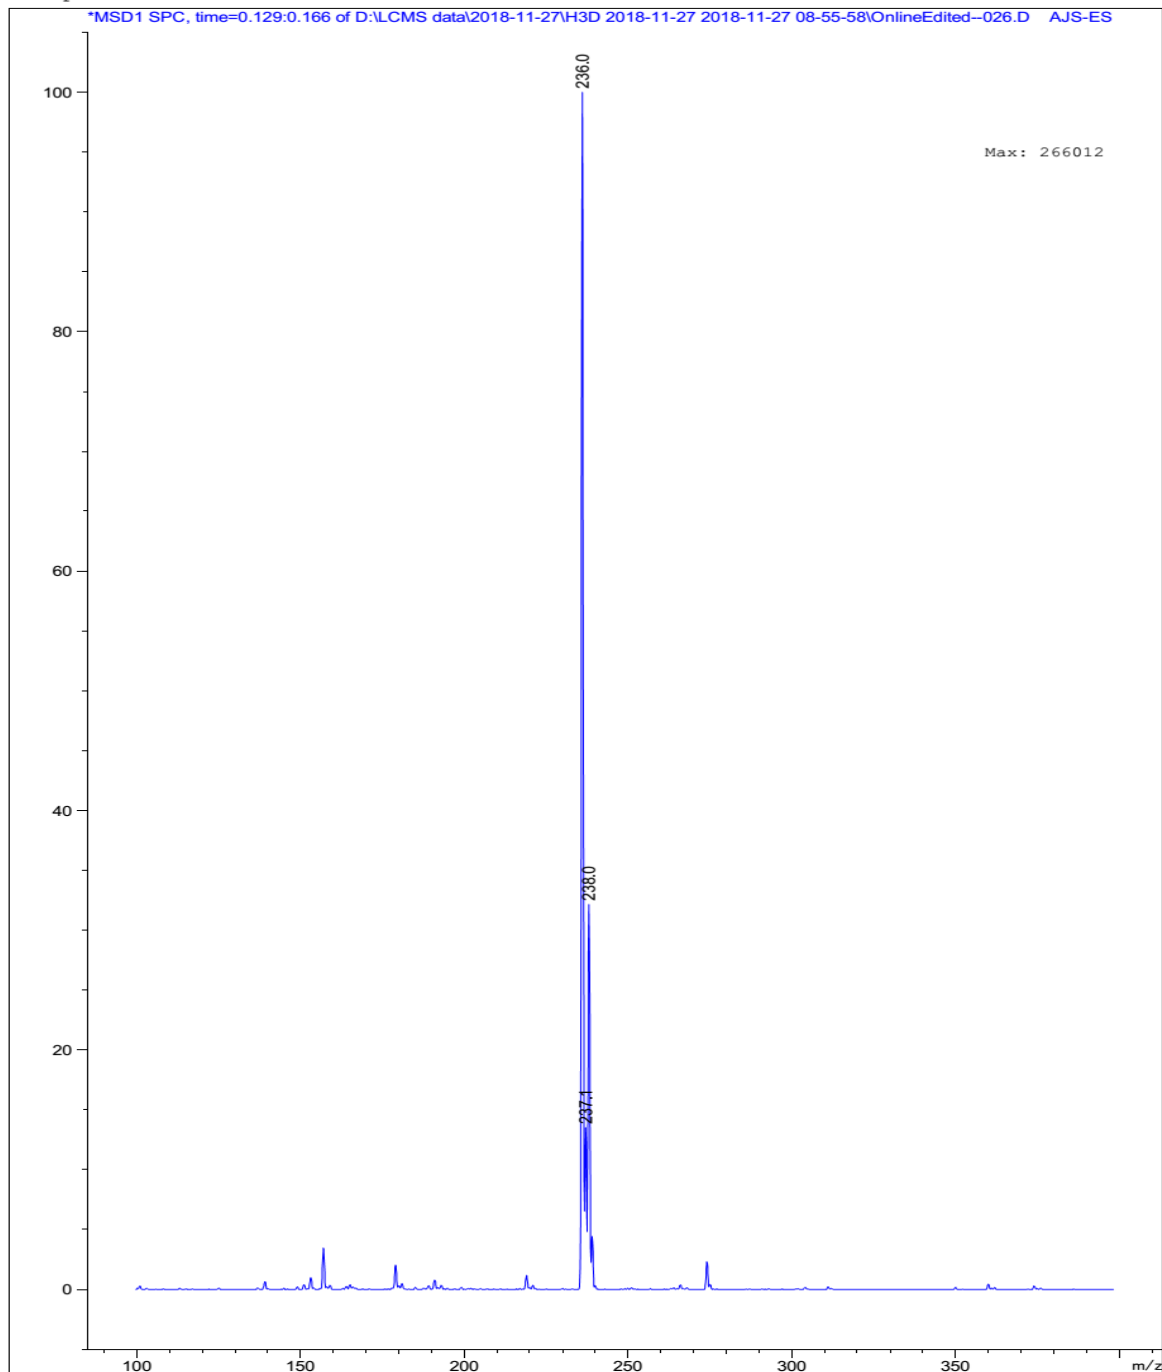

**S76:** HPLC-MS of **3**

MS Spectrum

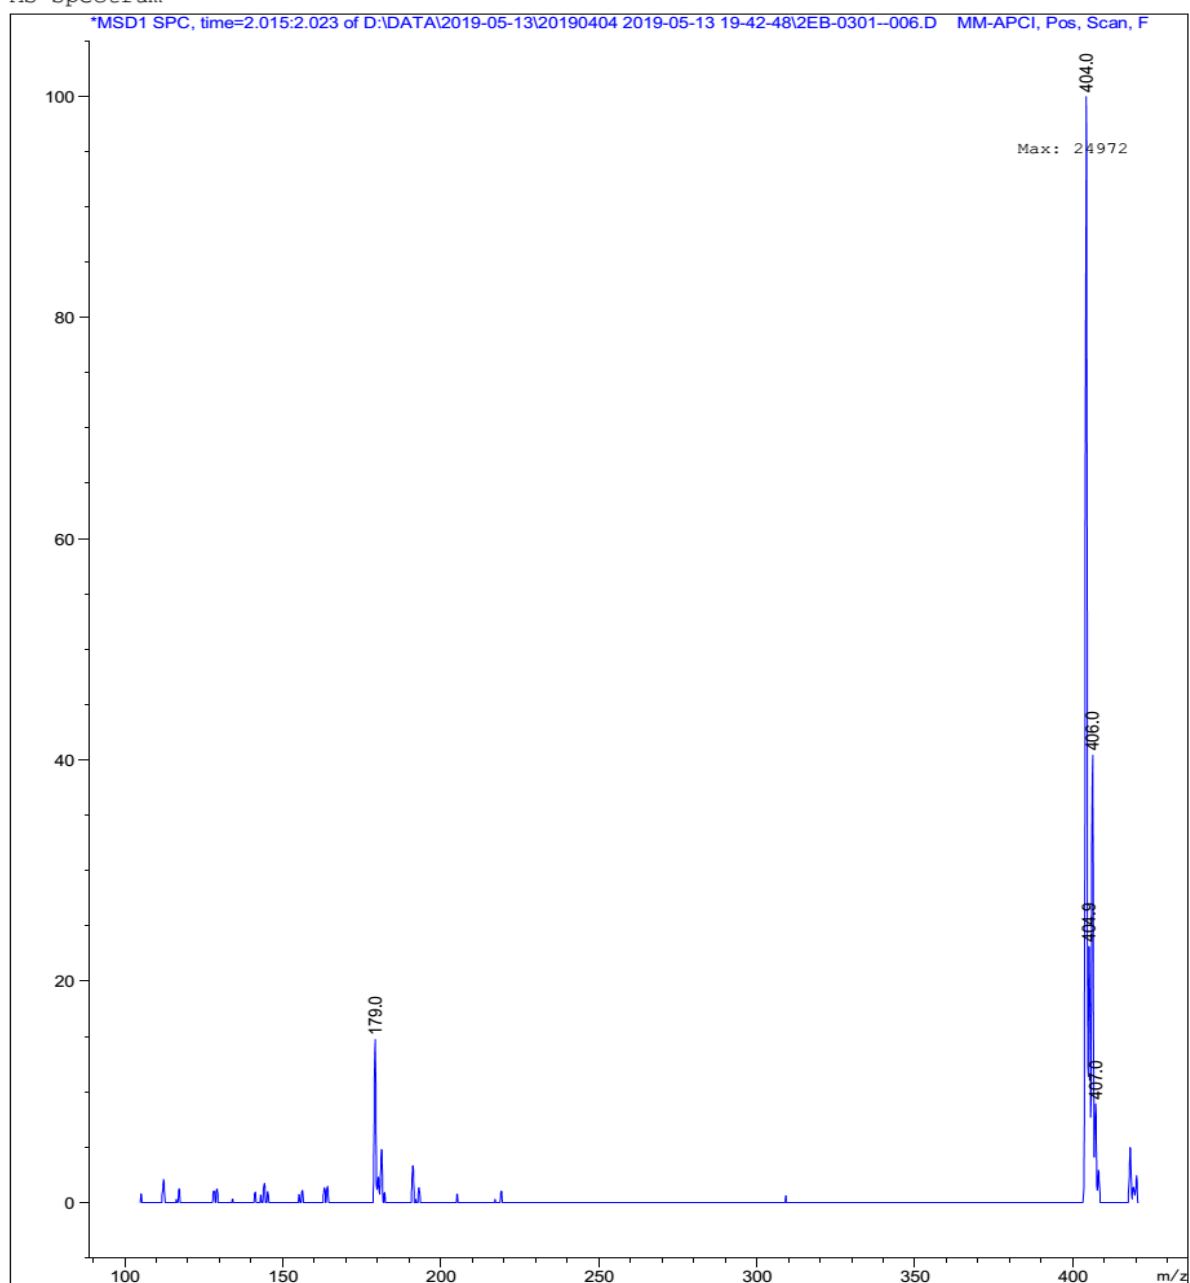

**S77:** HPLC-MS of **4**

MS Spectrum

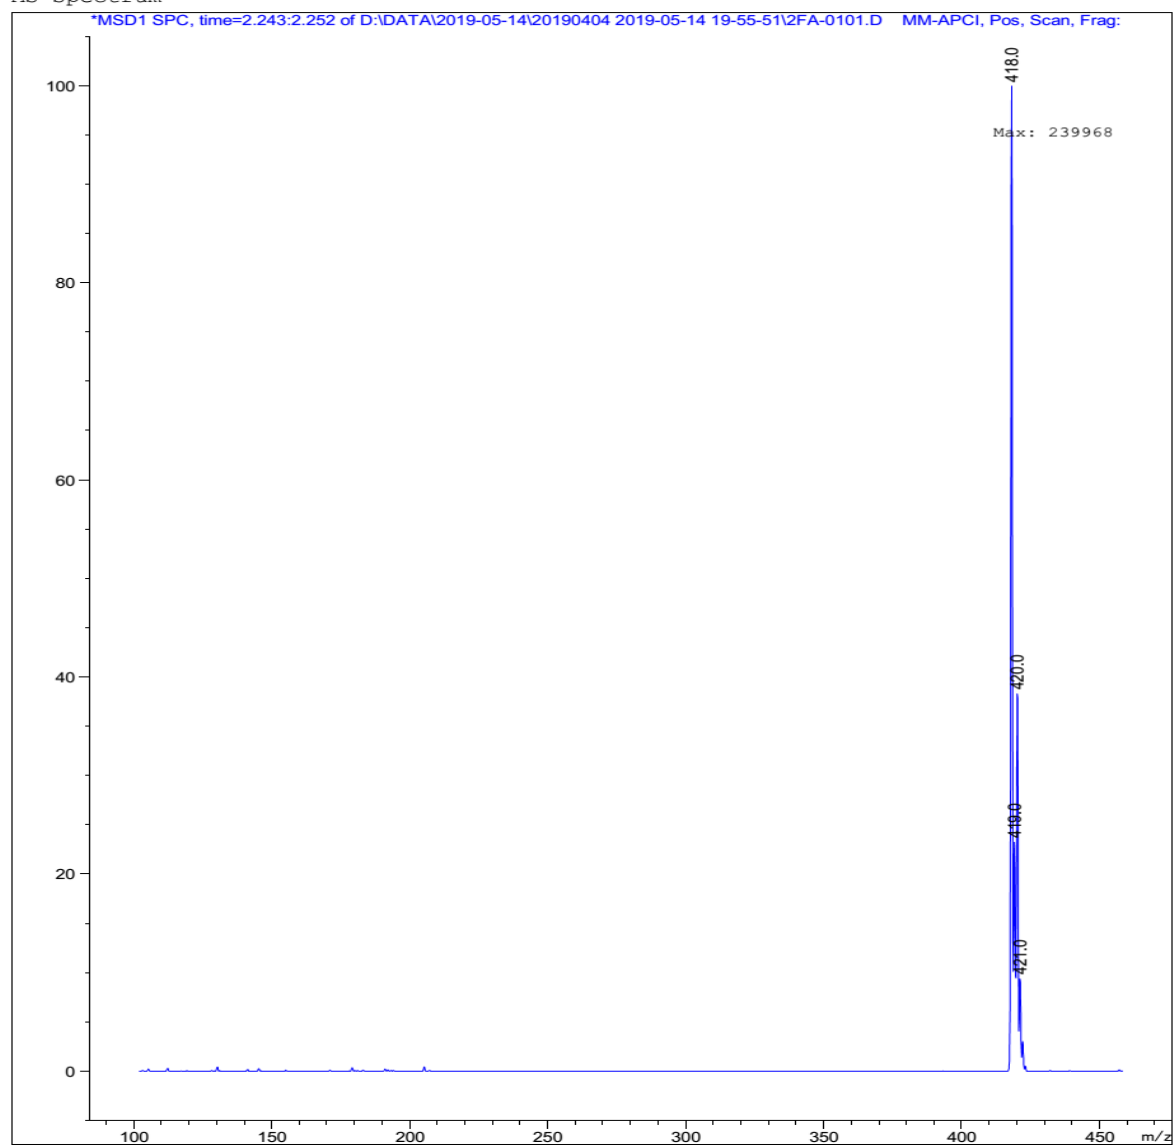

**S78:** HPLC-MS of **5**

MS Spectrum

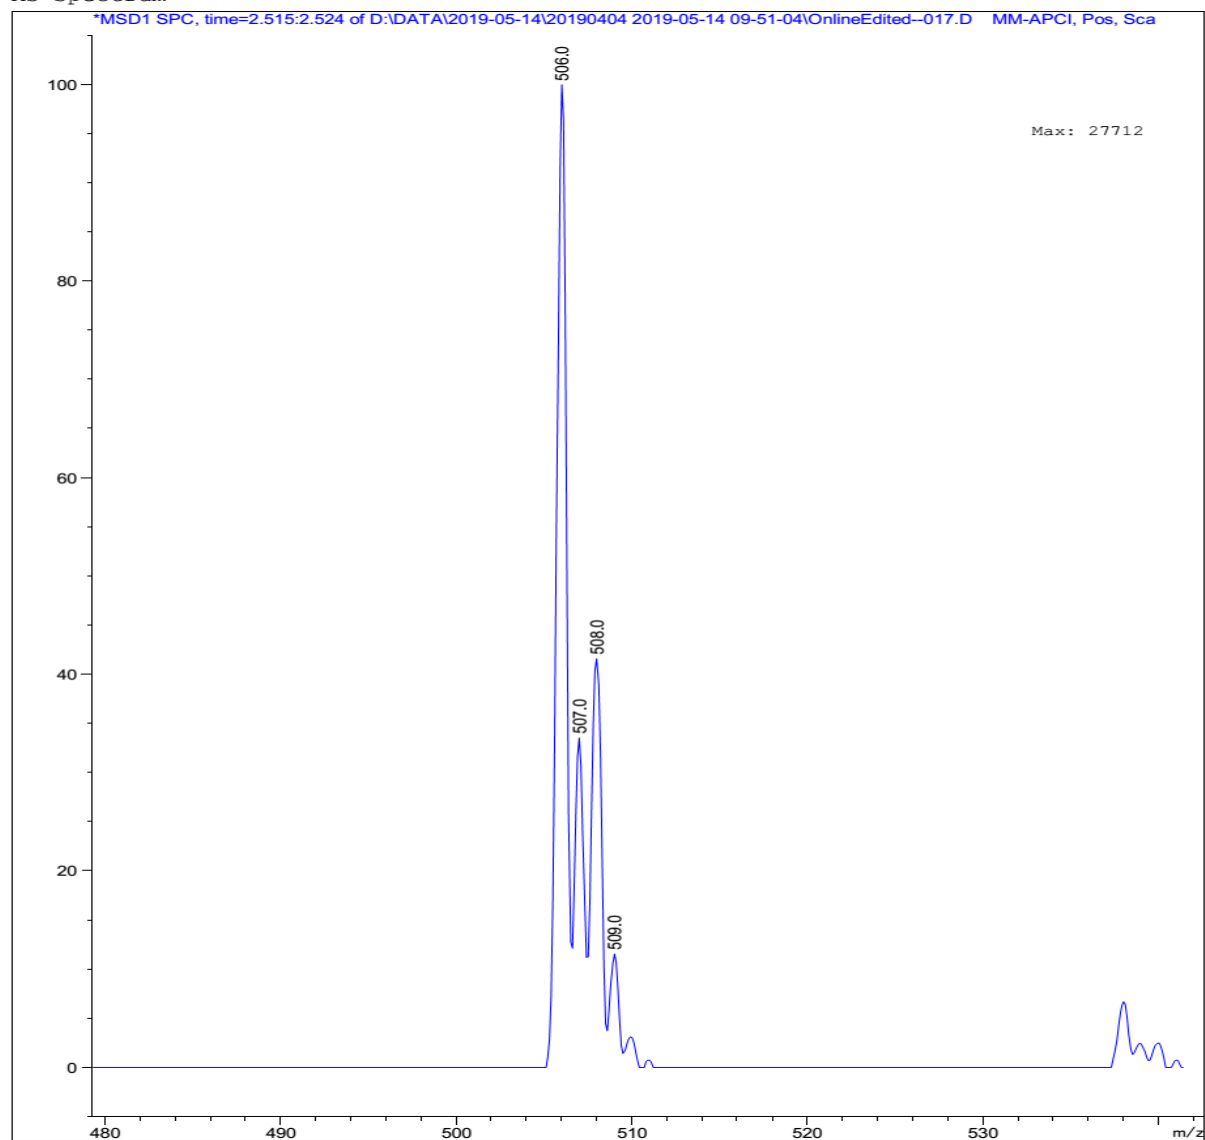

**S79:** HPLC-MS of **6**

MS Spectrum

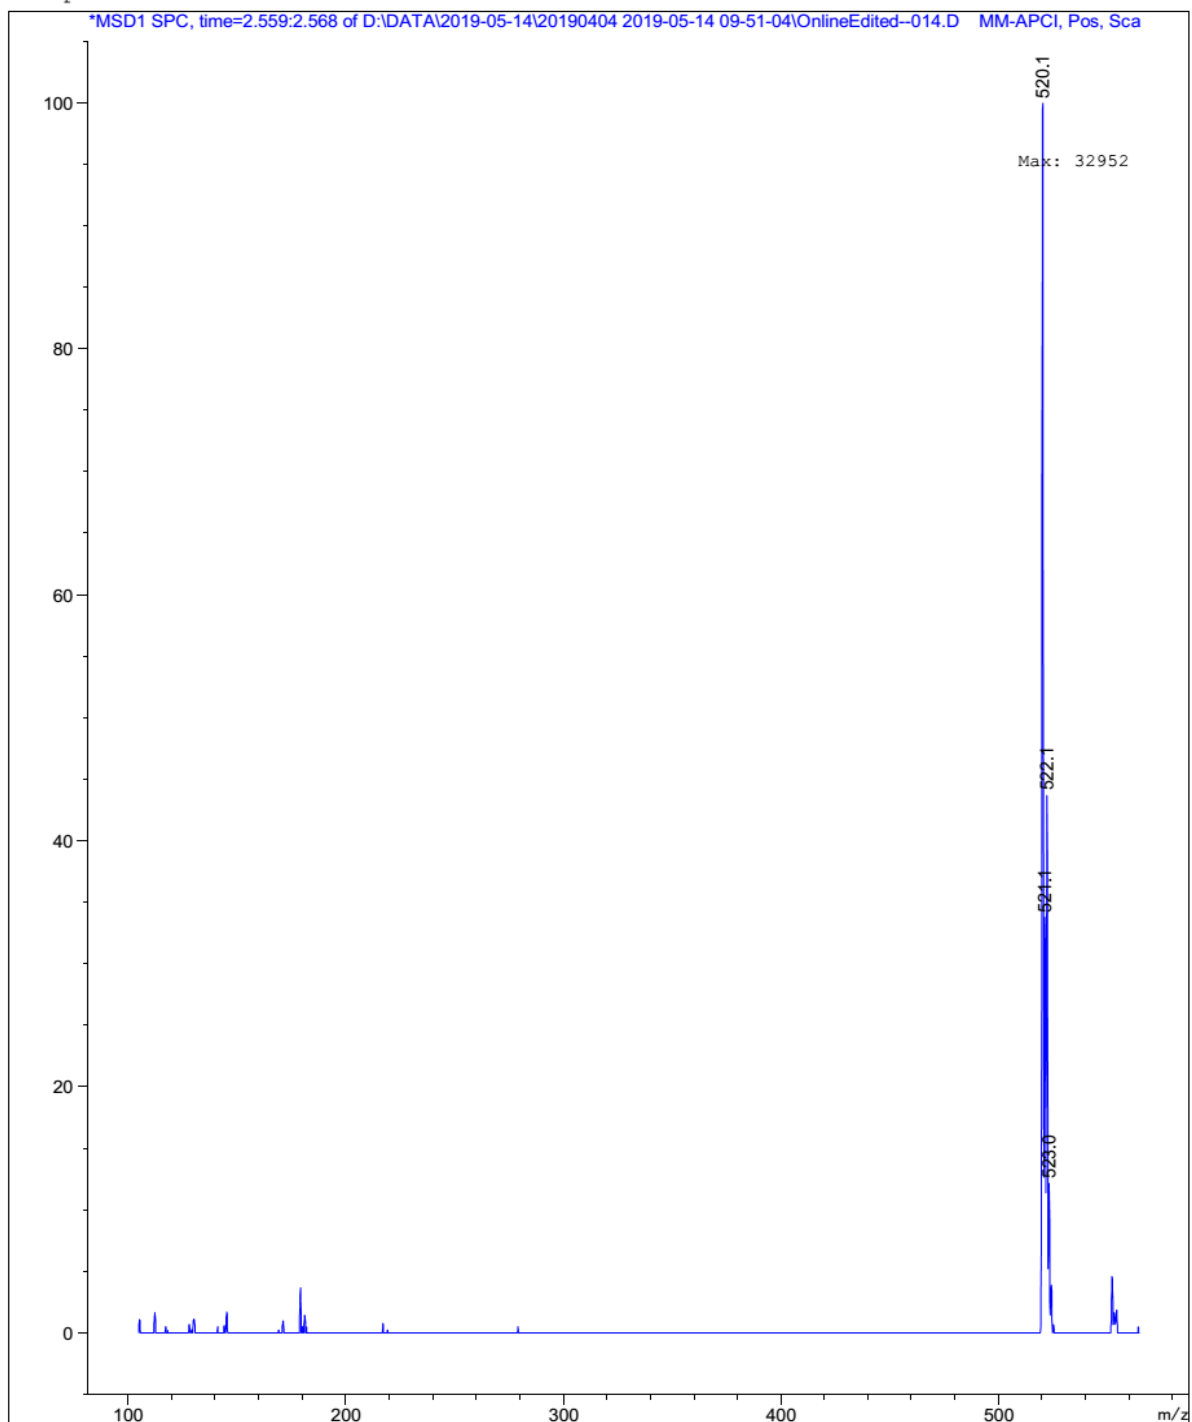

**S80:** HPLC-MS of 7



MS Spectrum

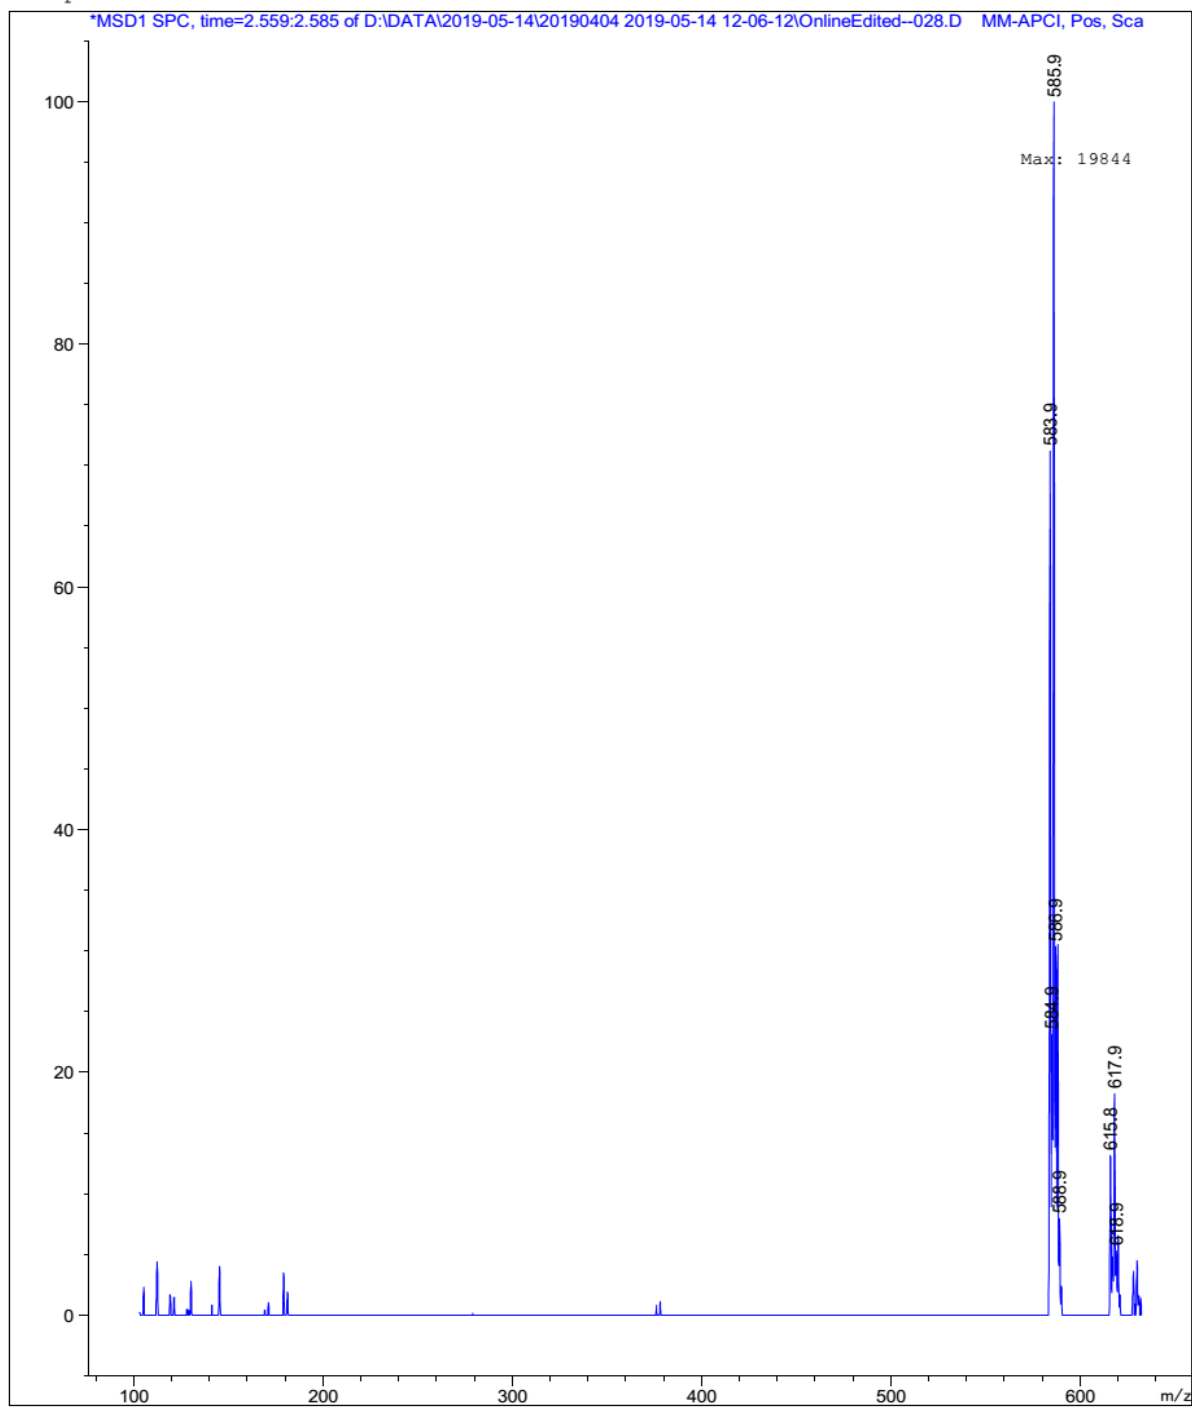

**S81:** HPLC-MS of **8**

MS Spectrum

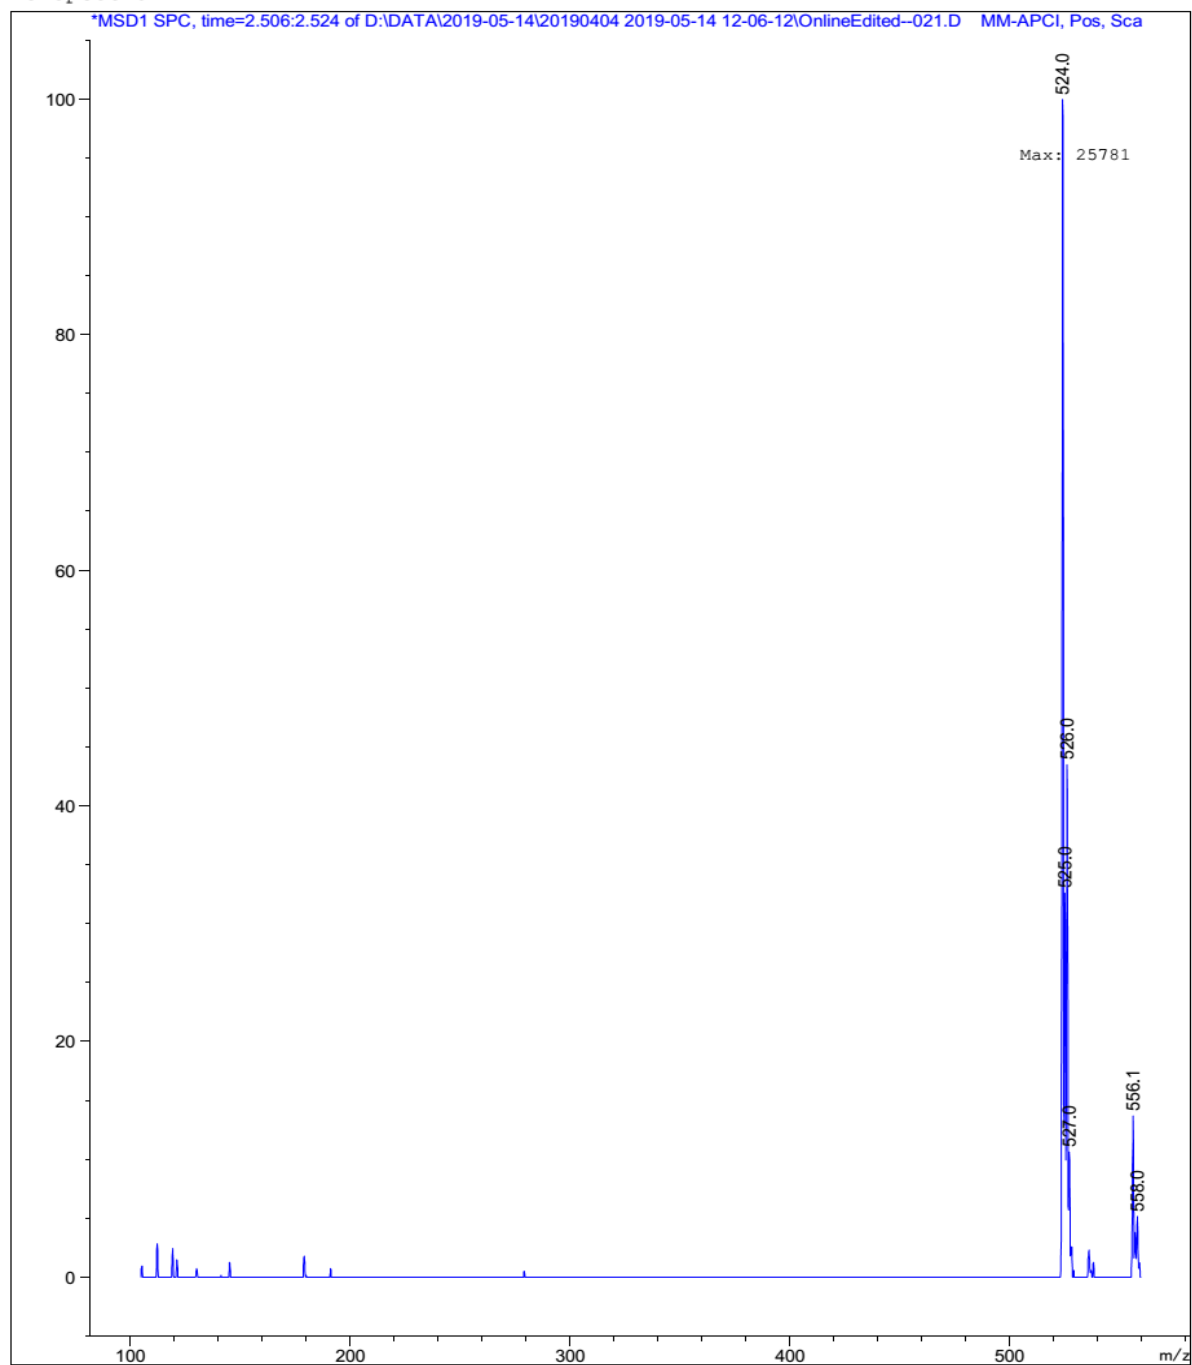

**S82:** HPLC-MS of **9**

MS Spectrum

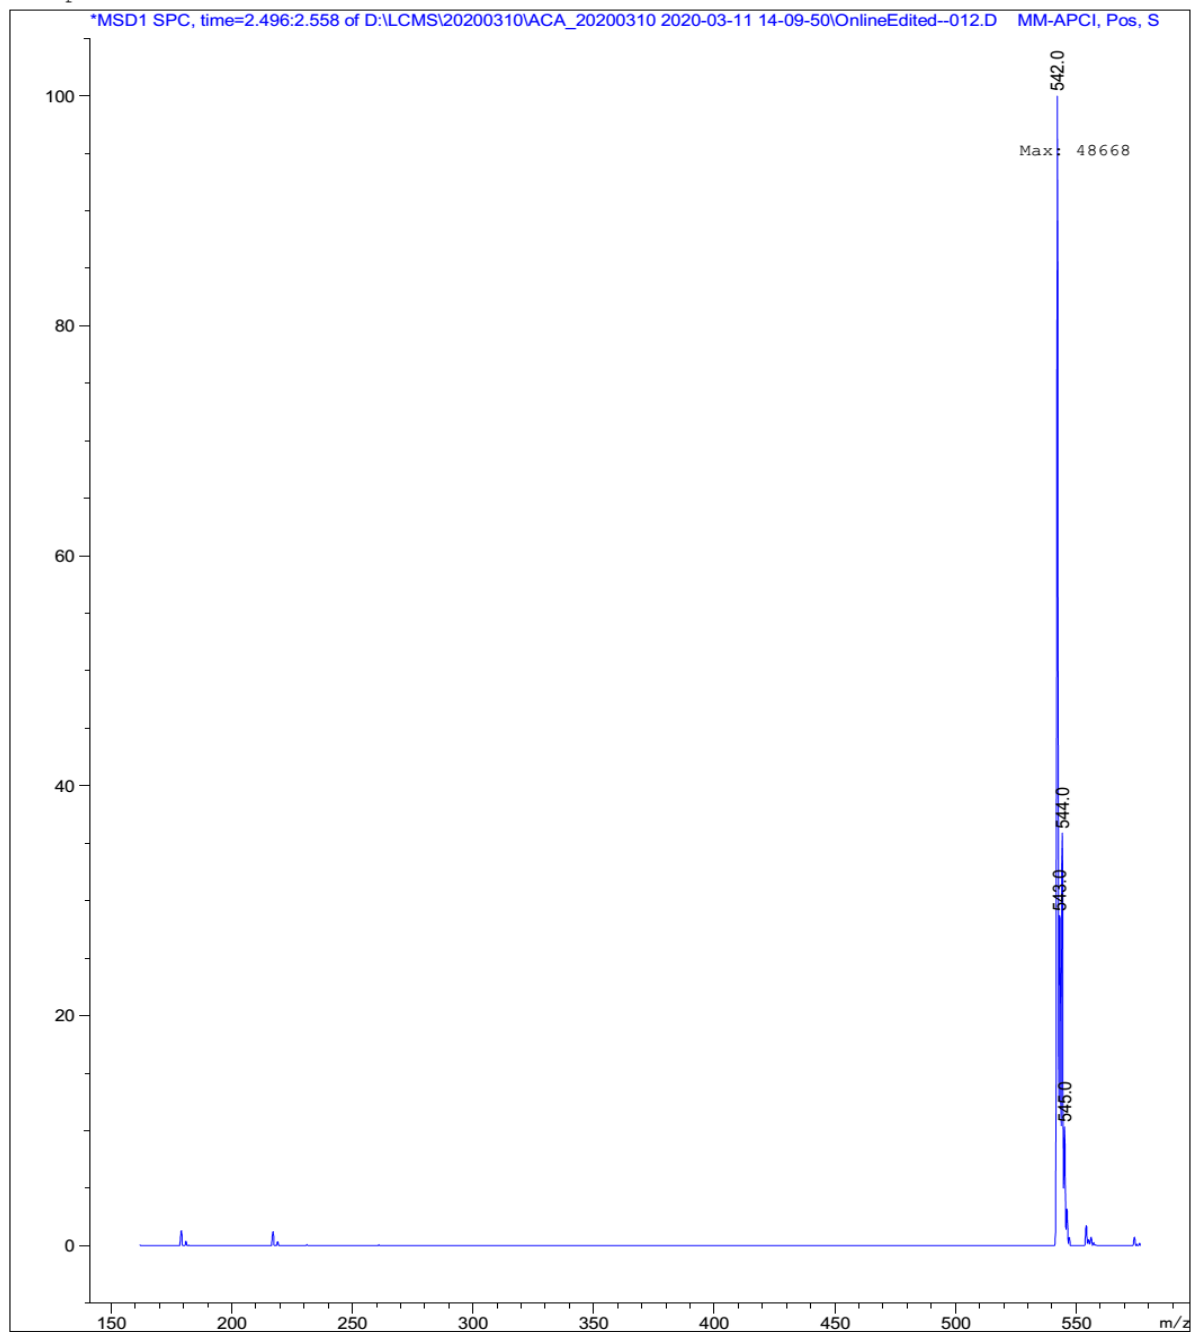

**S83: HPLC-MS of 10**

MS Spectrum

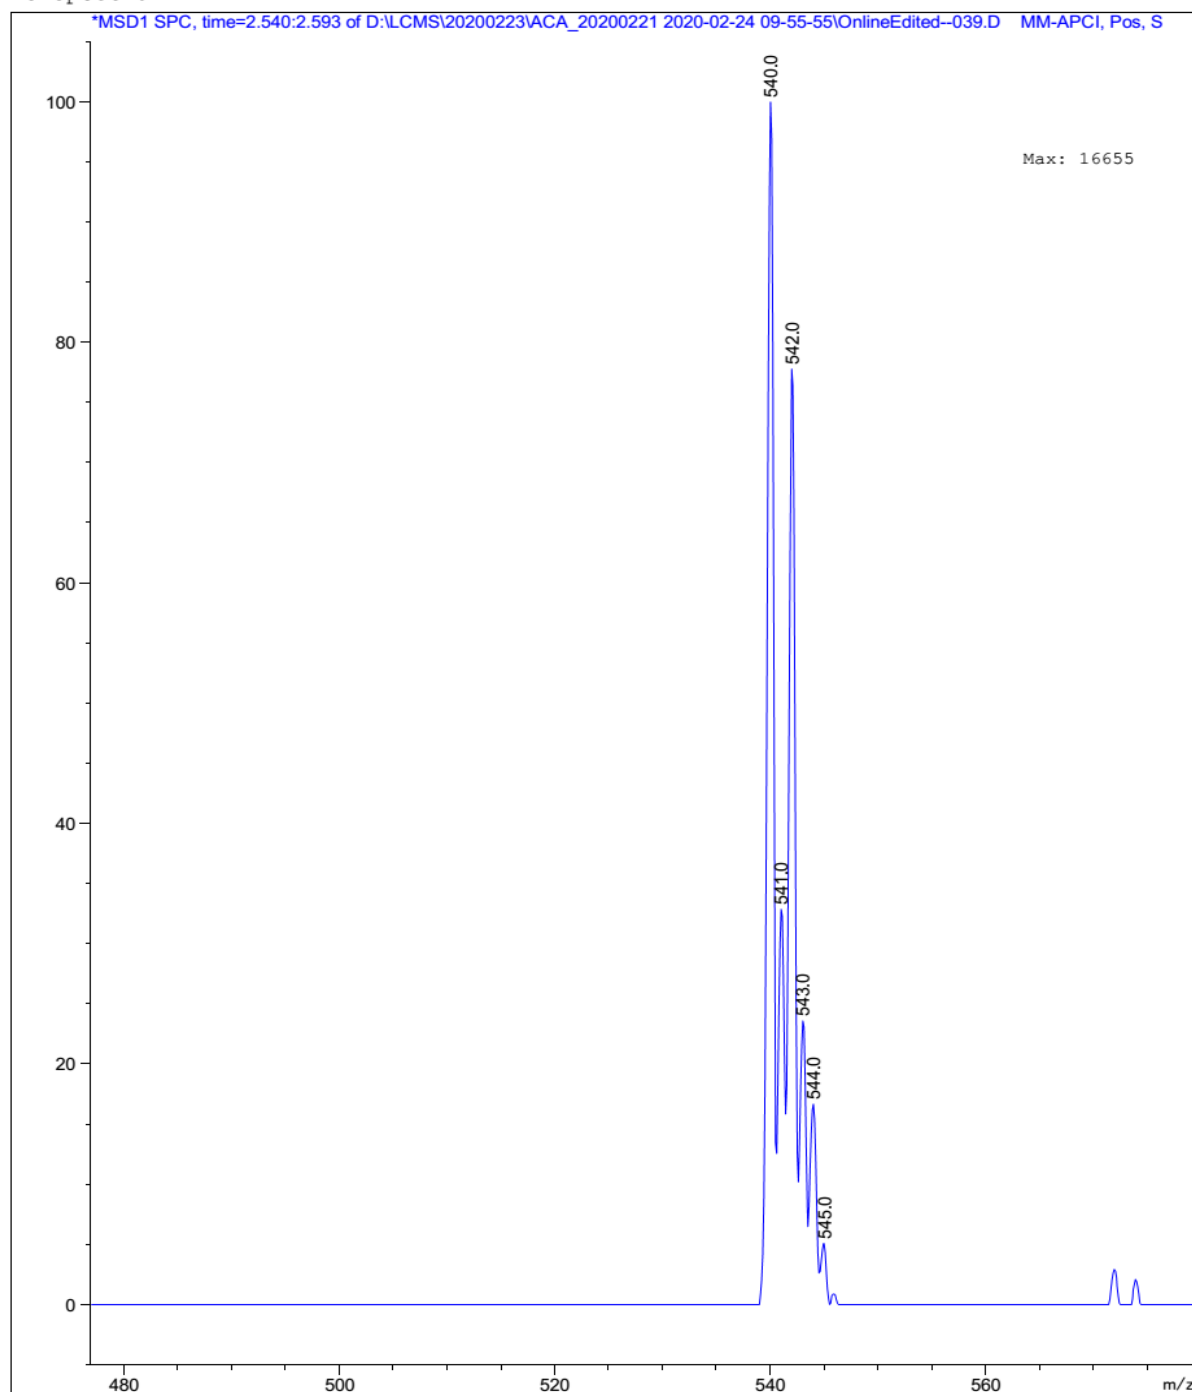

**S84:** HPLC-MS of **11**

MS Spectrum

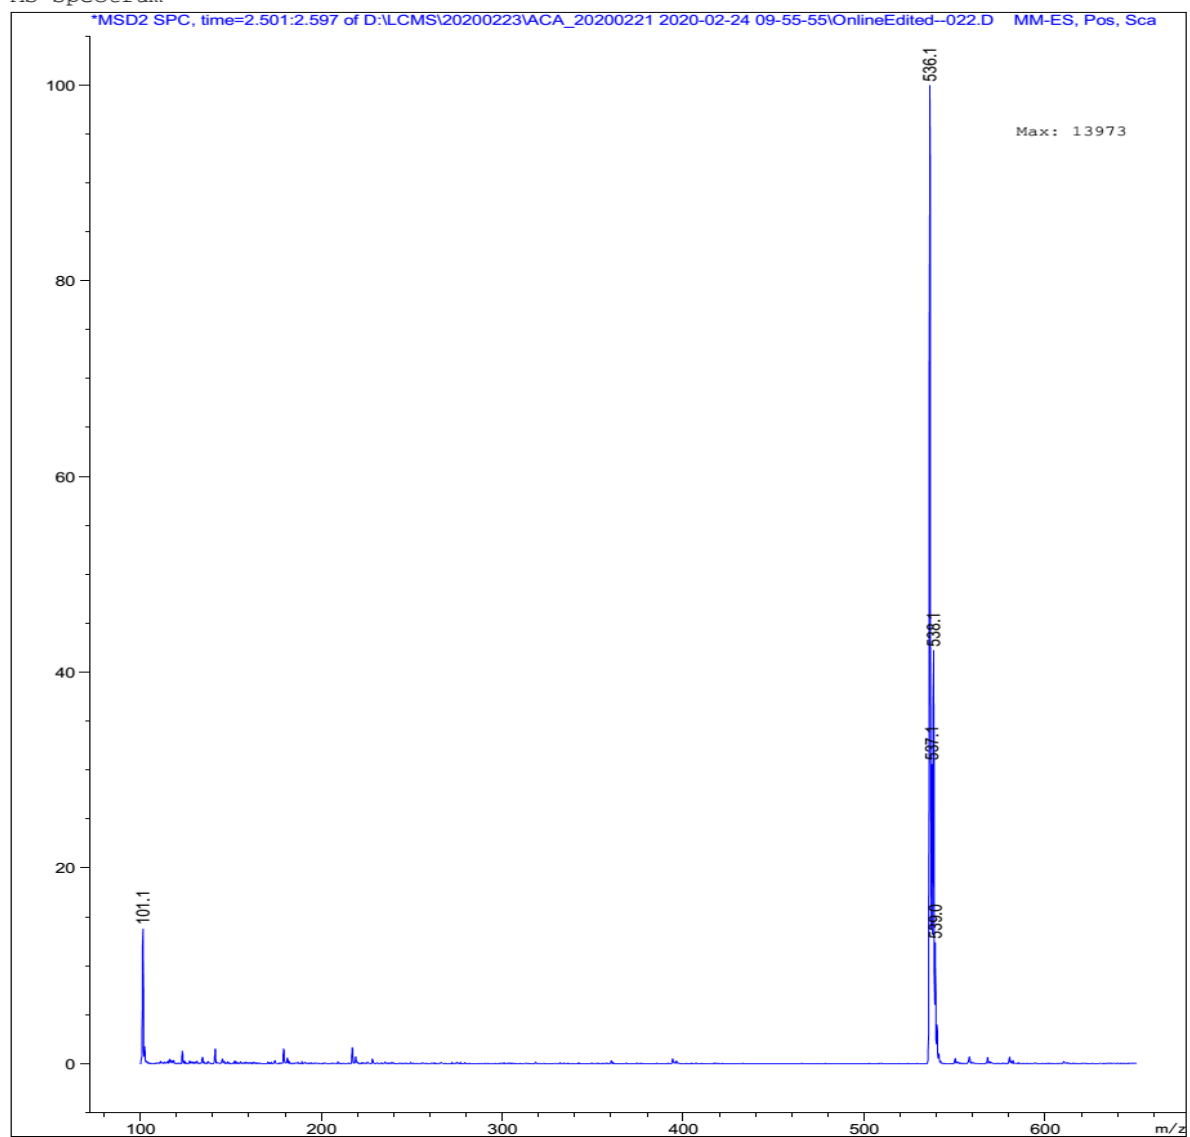

**S85: HPLC-MS of 12**

MS Spectrum

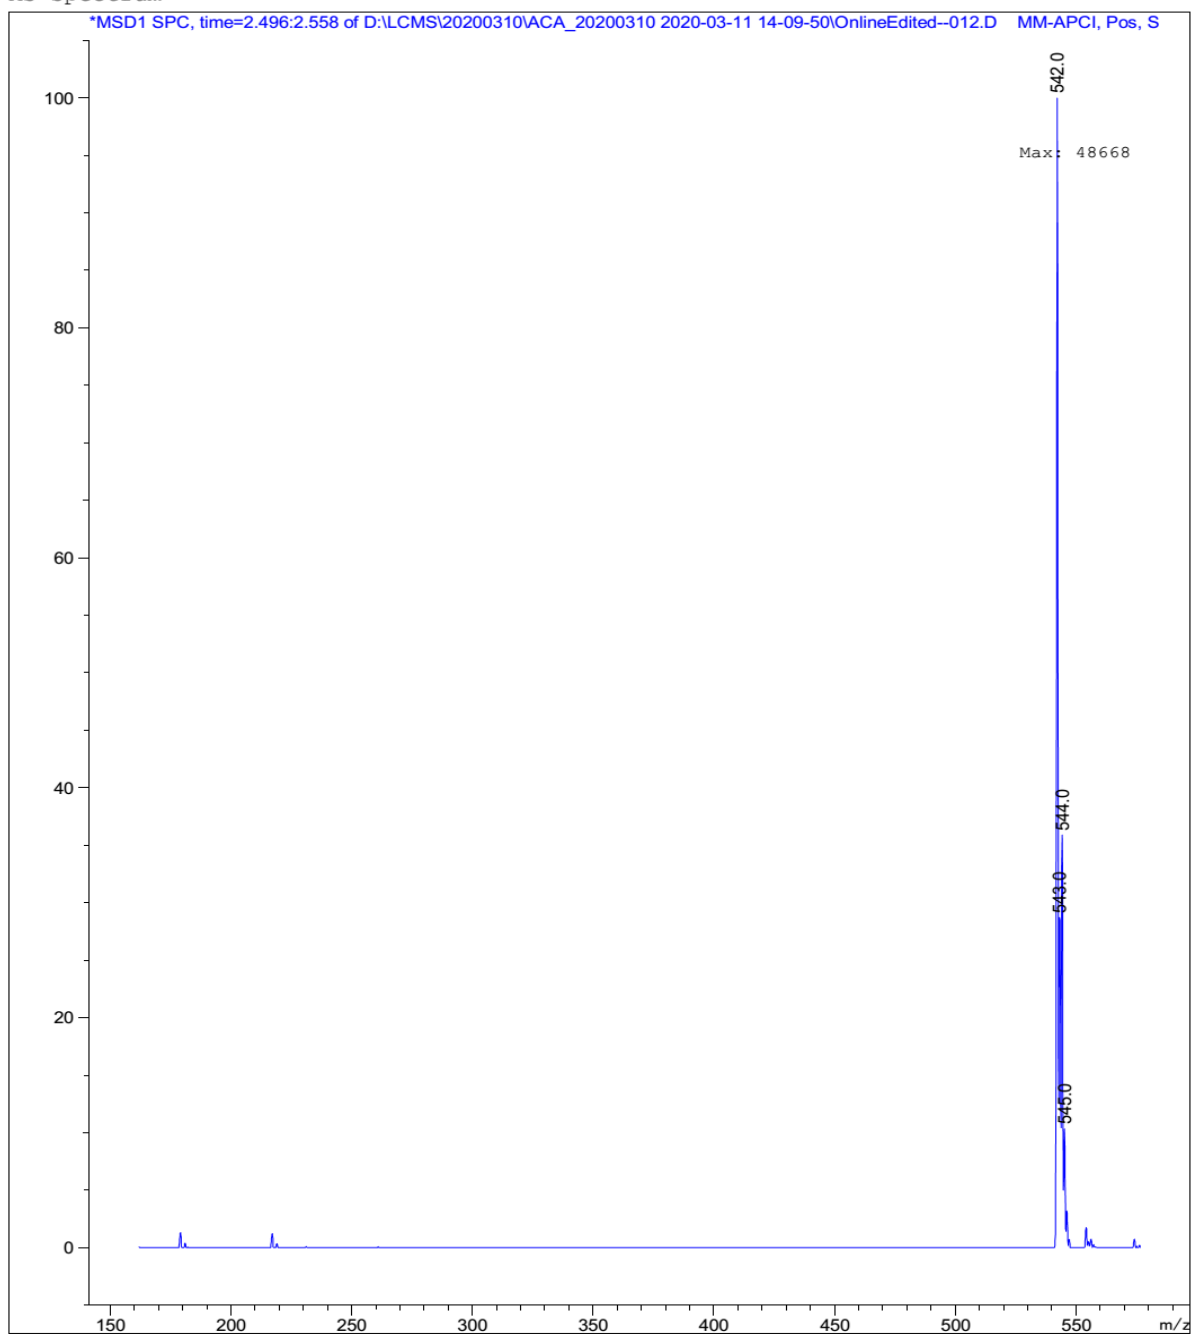

**S86: HPLC-MS of 13**

MS Spectrum

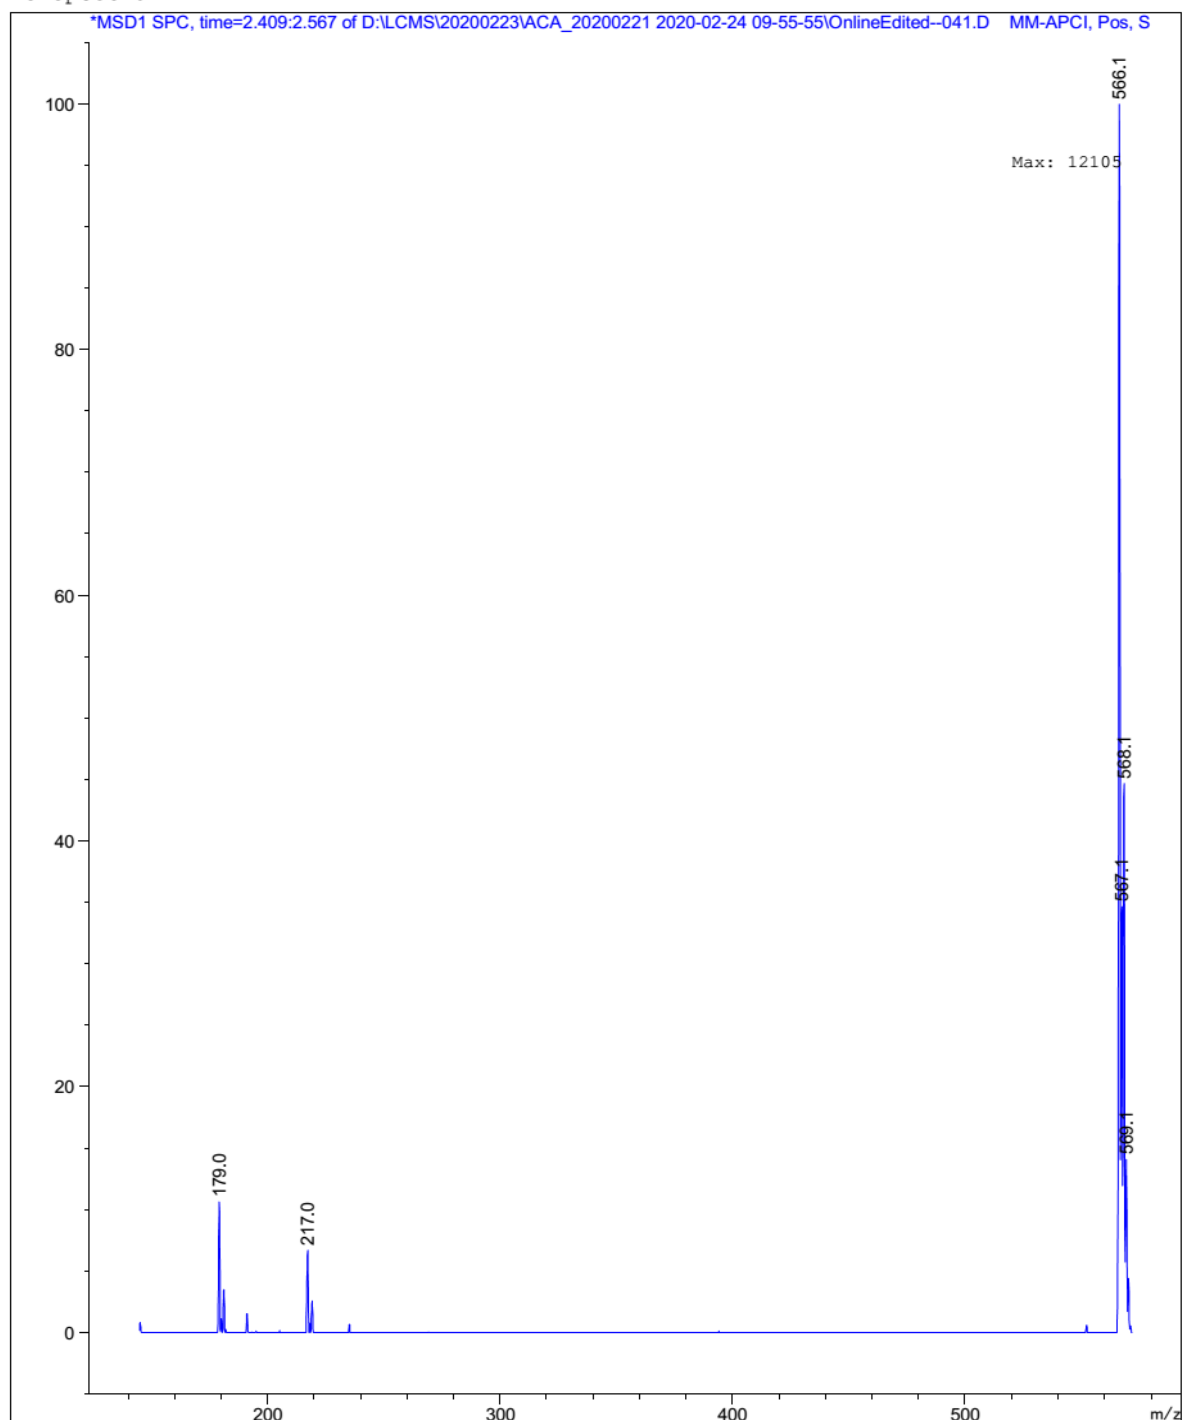

**S87: HPLC-MS of 14**

MS Spectrum

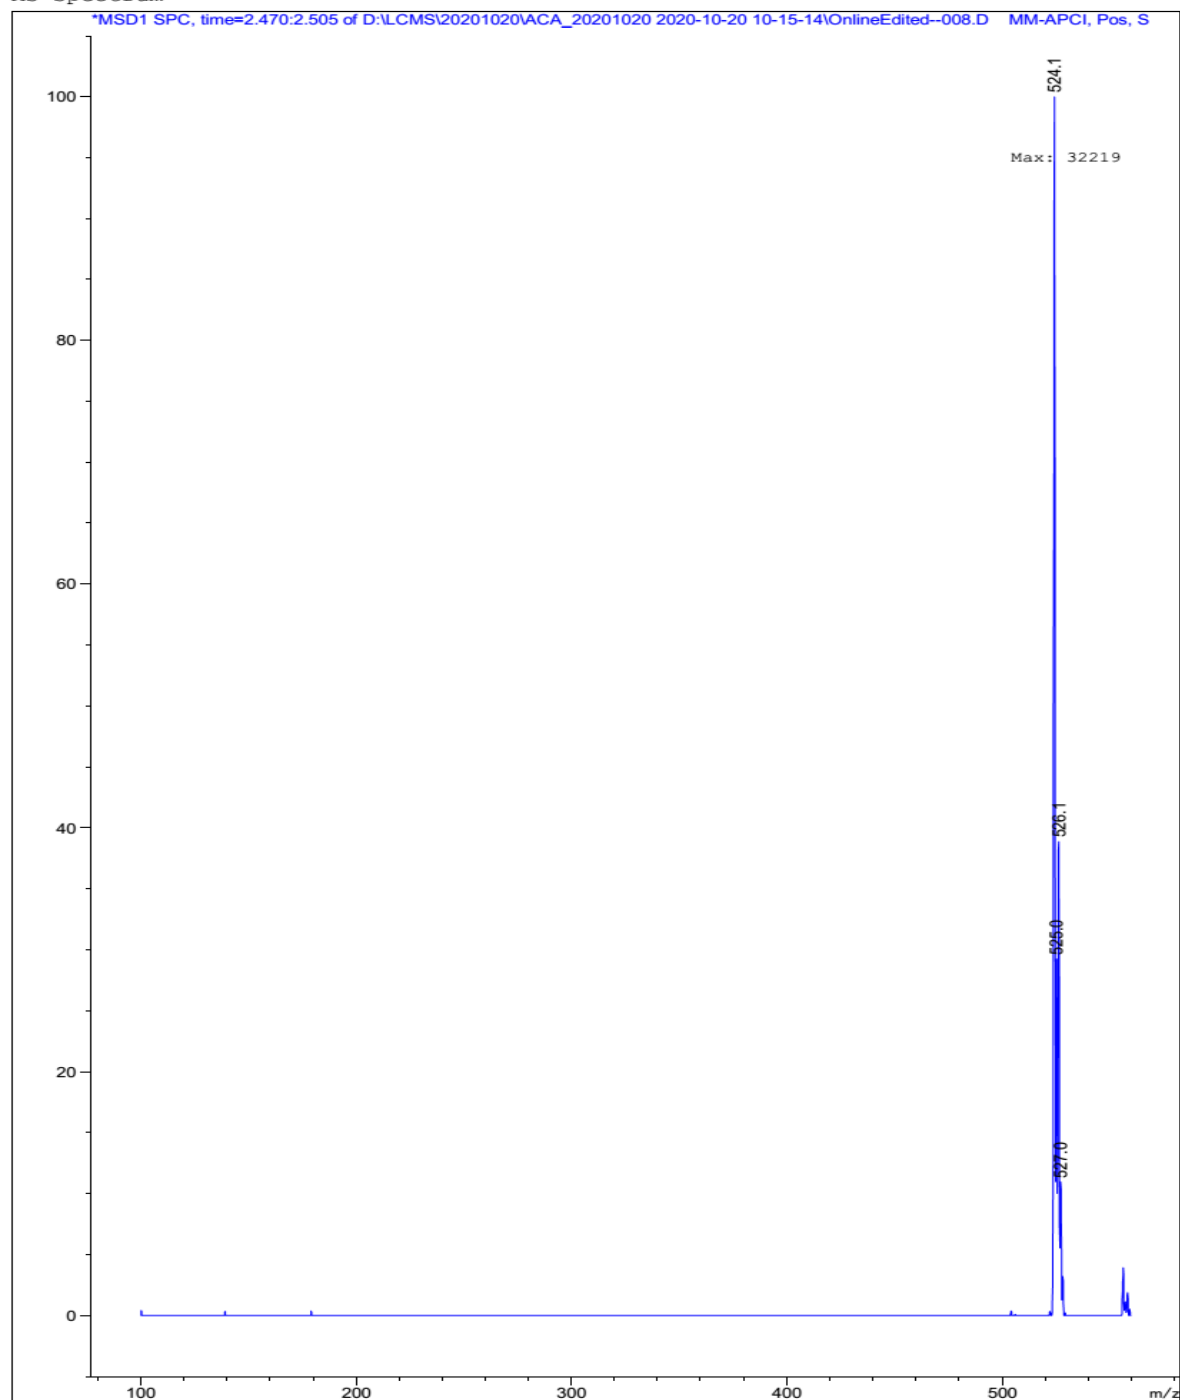

S88: HPLC-MS of 15



MS Spectrum

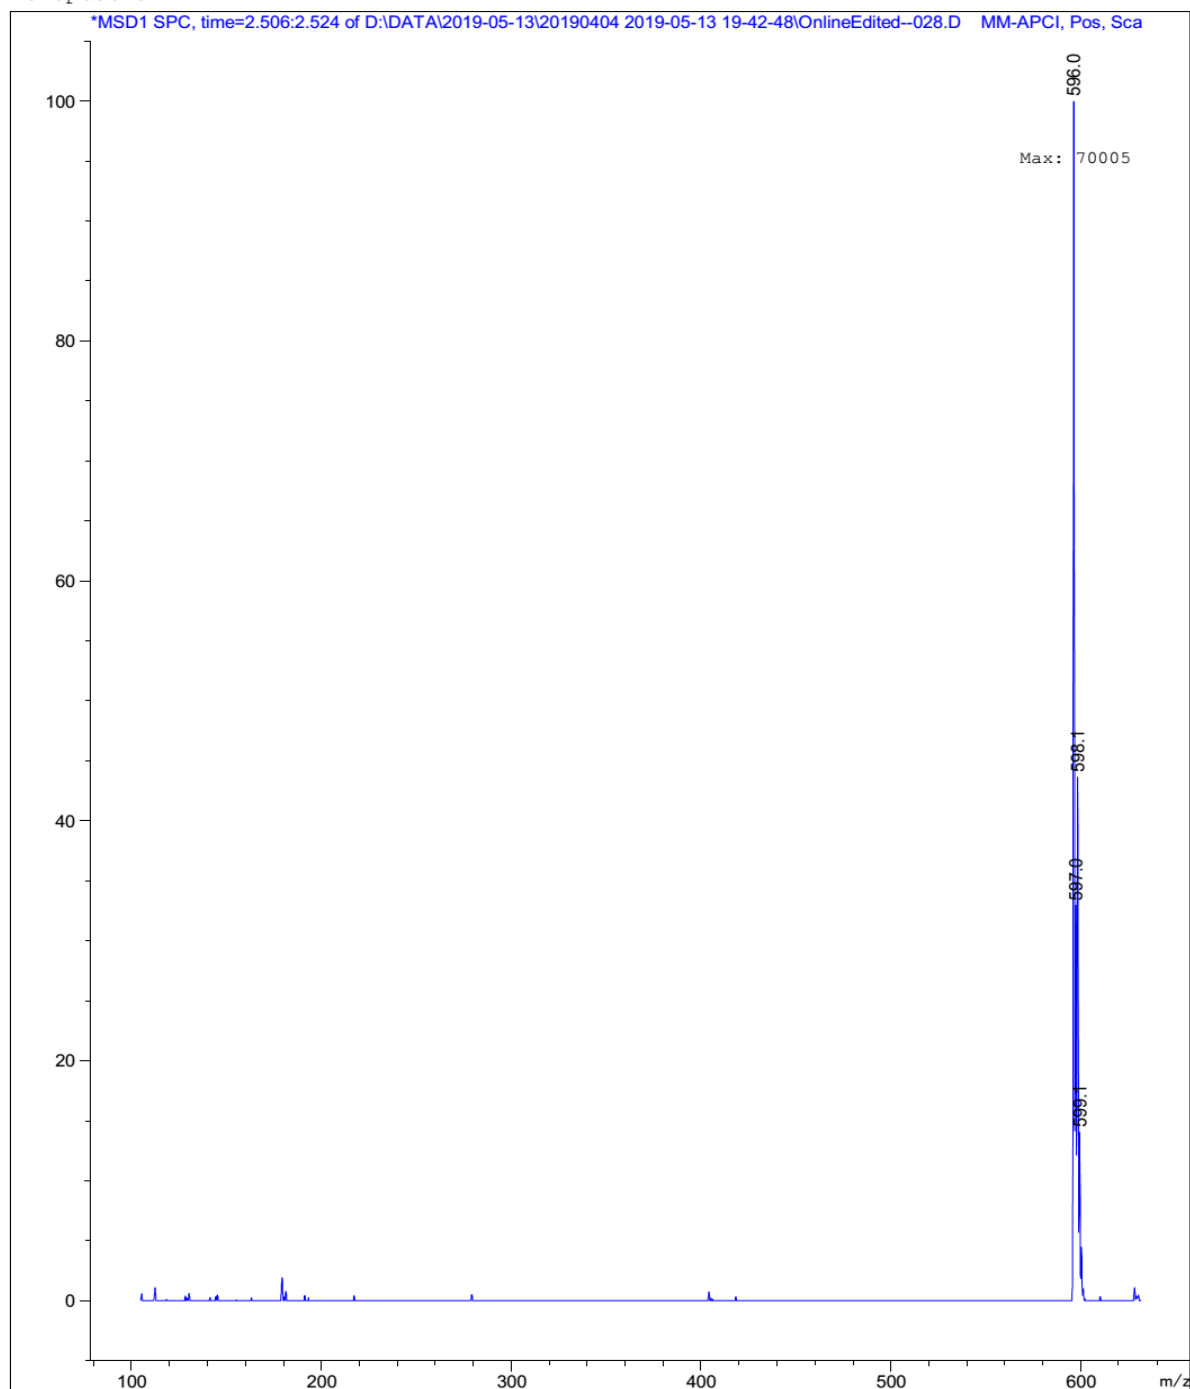

**S89: HPLC-MS of 16**

MS Spectrum

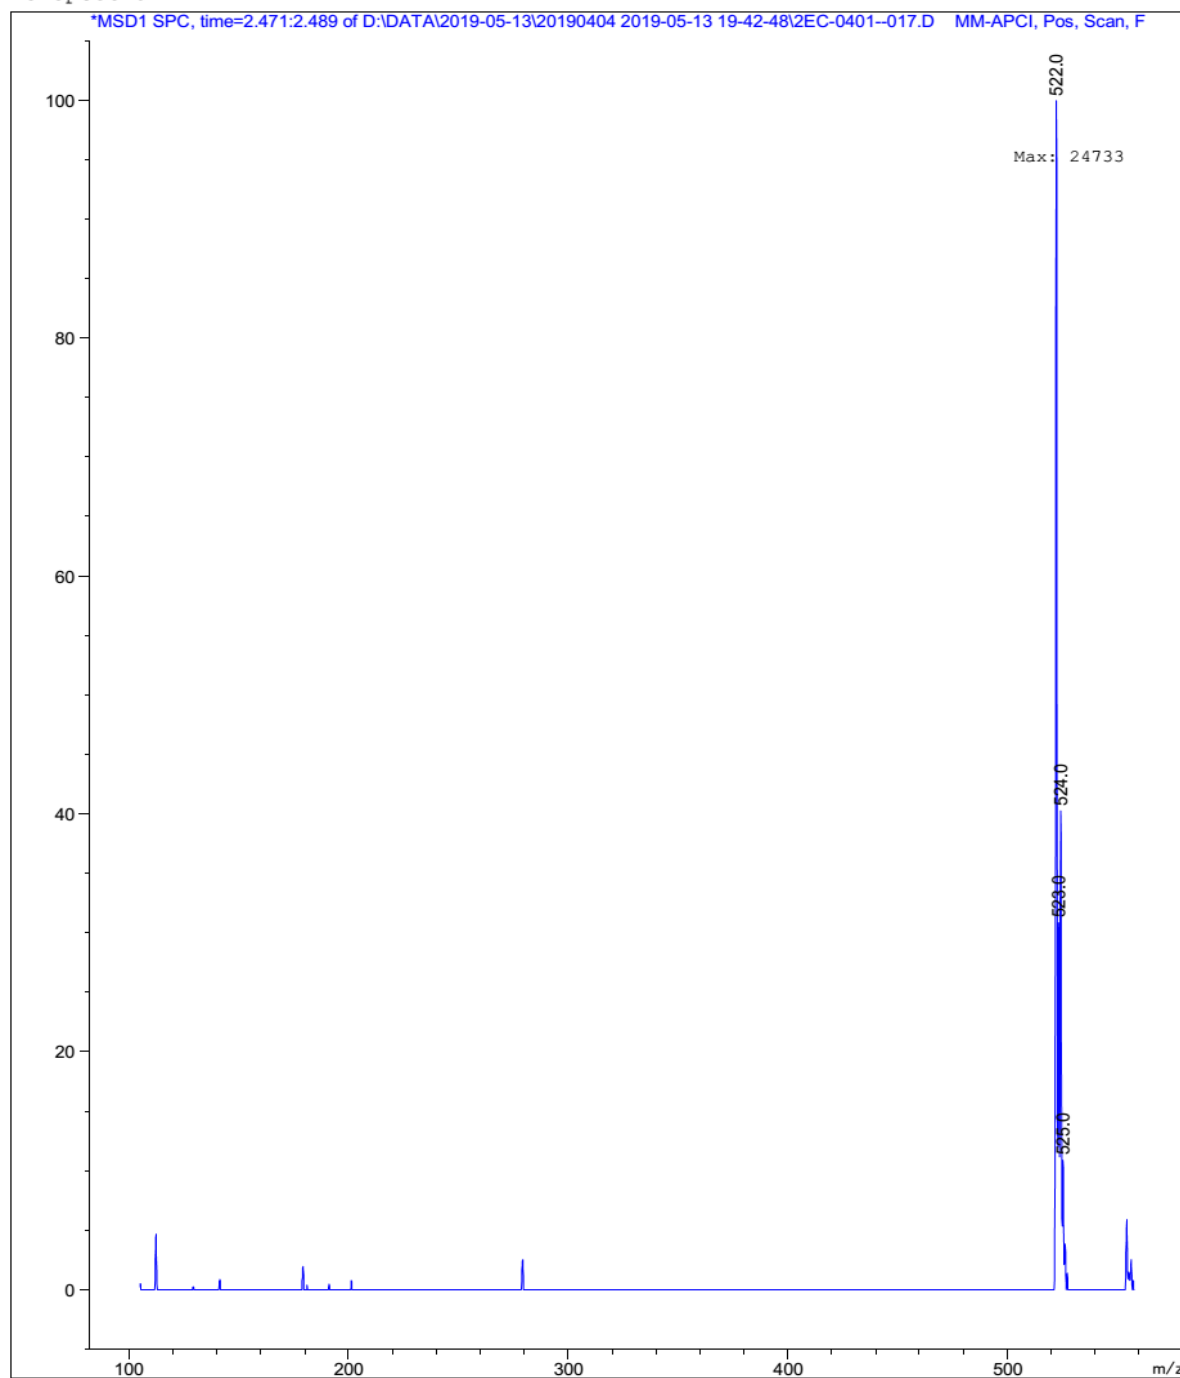

**S90: HPLC-MS of 17**

MS Spectrum

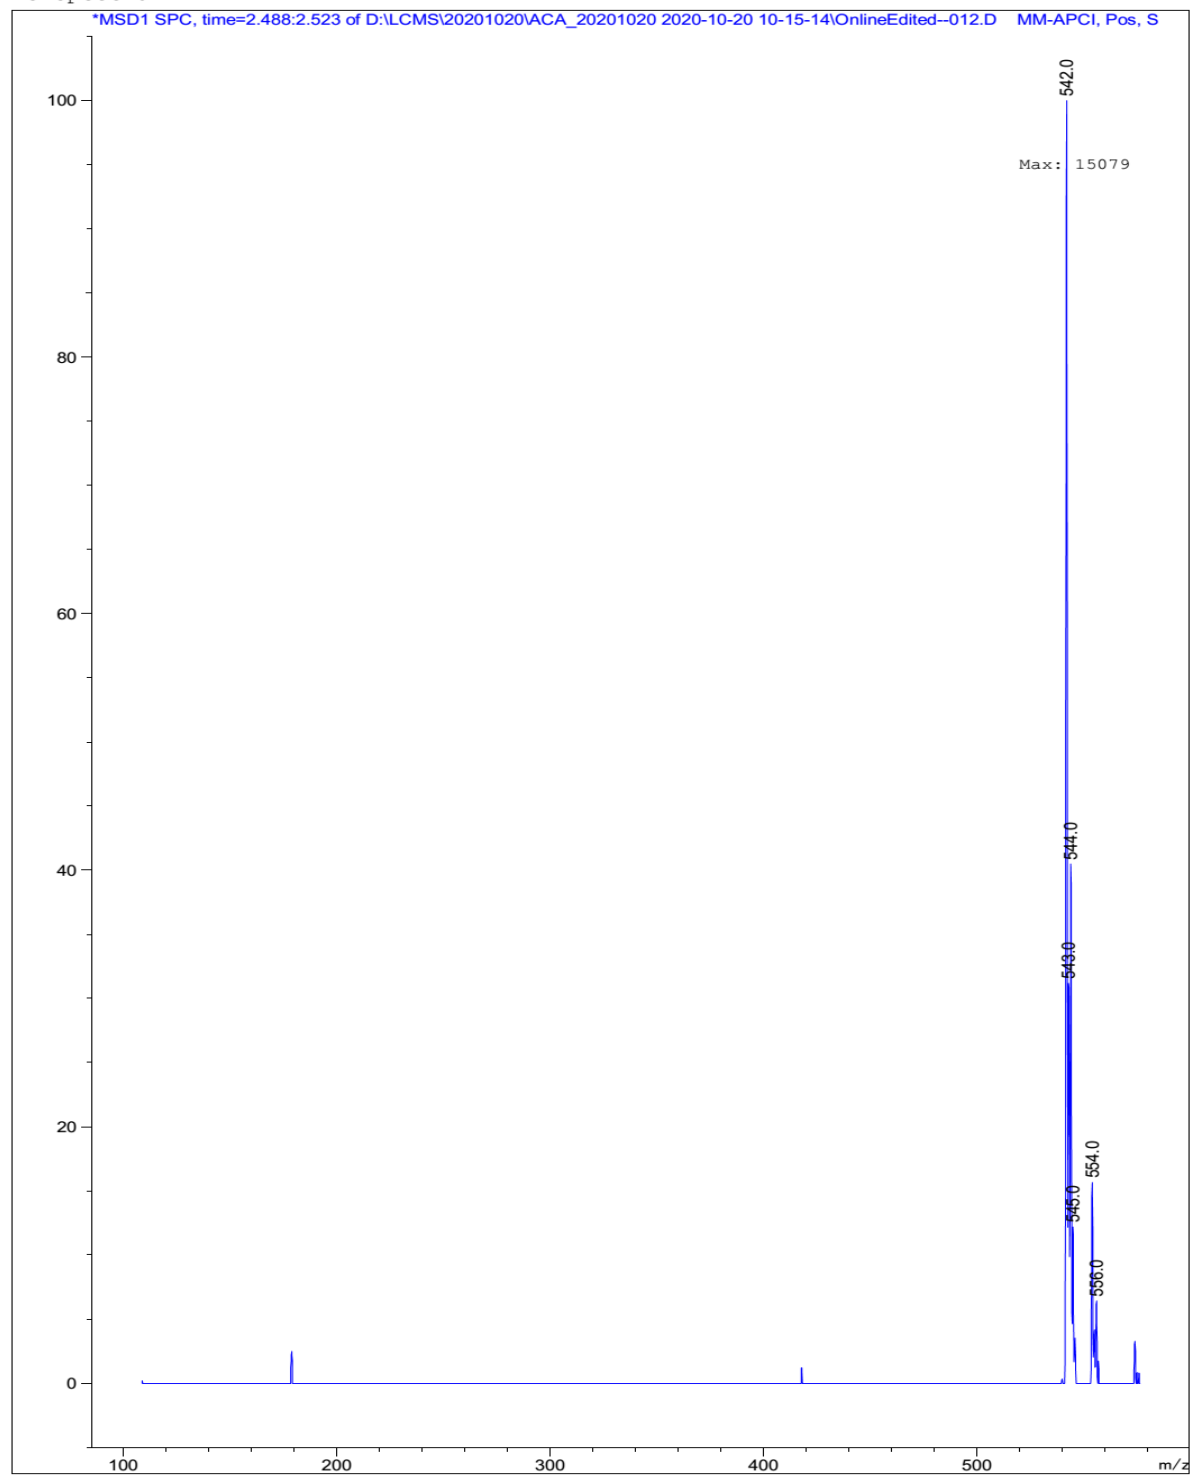

**S91: HPLC-MS of 18**

MS Spectrum

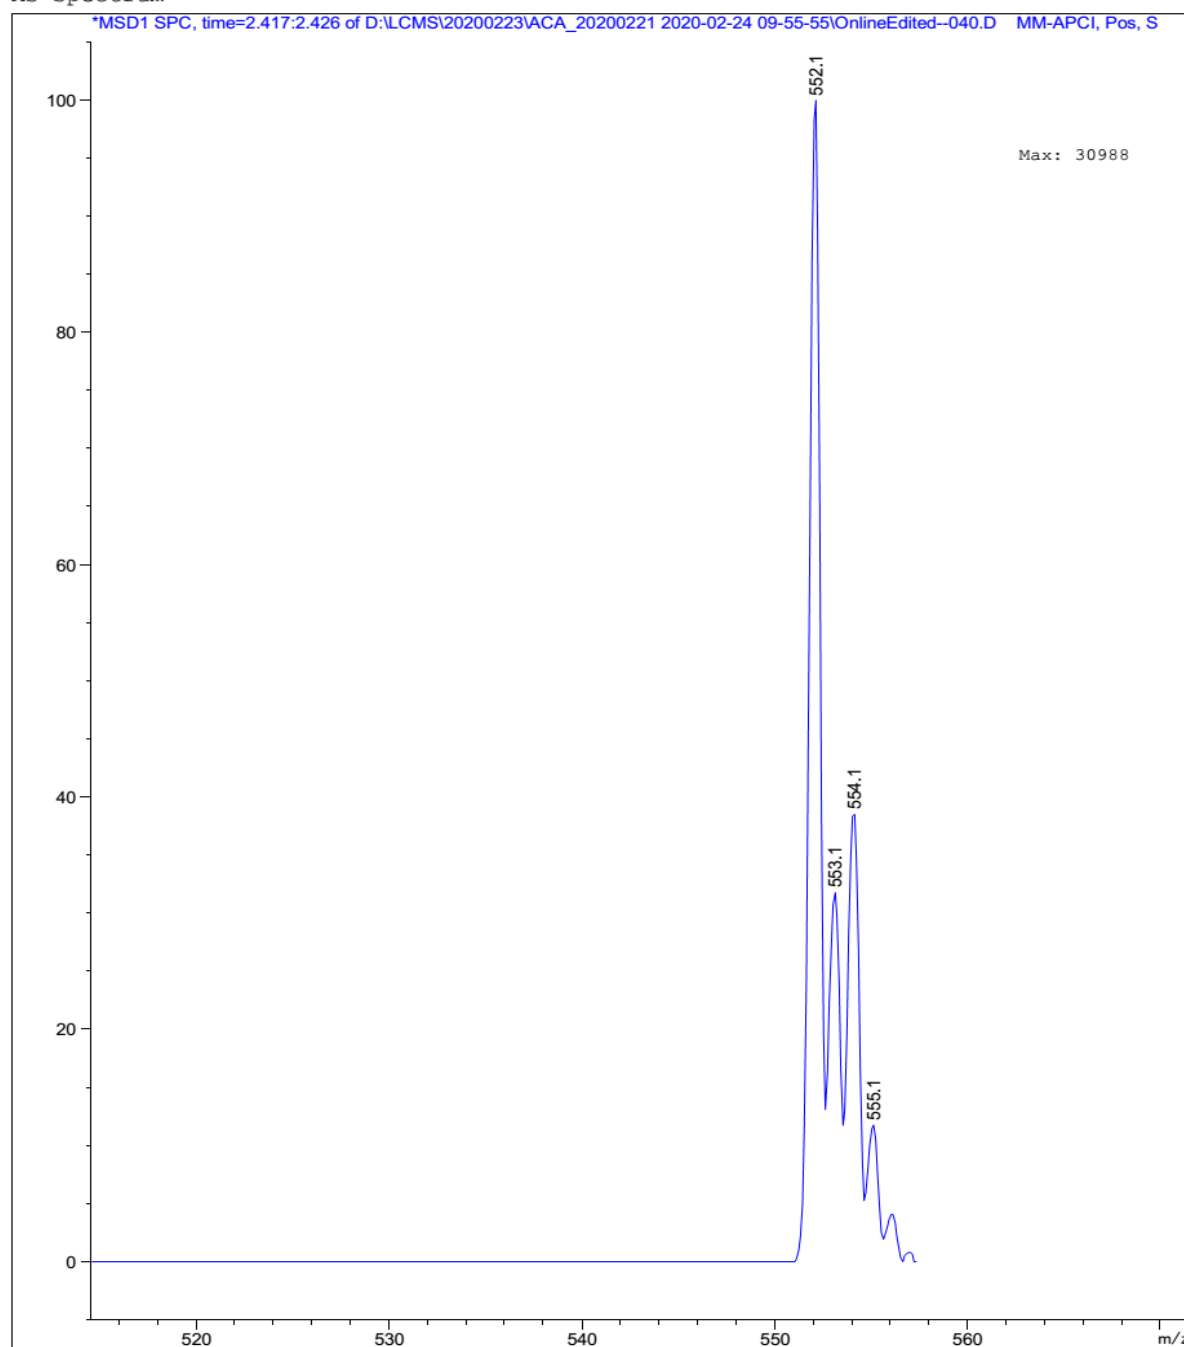

**S92: HPLC-MS of 19**

MS Spectrum

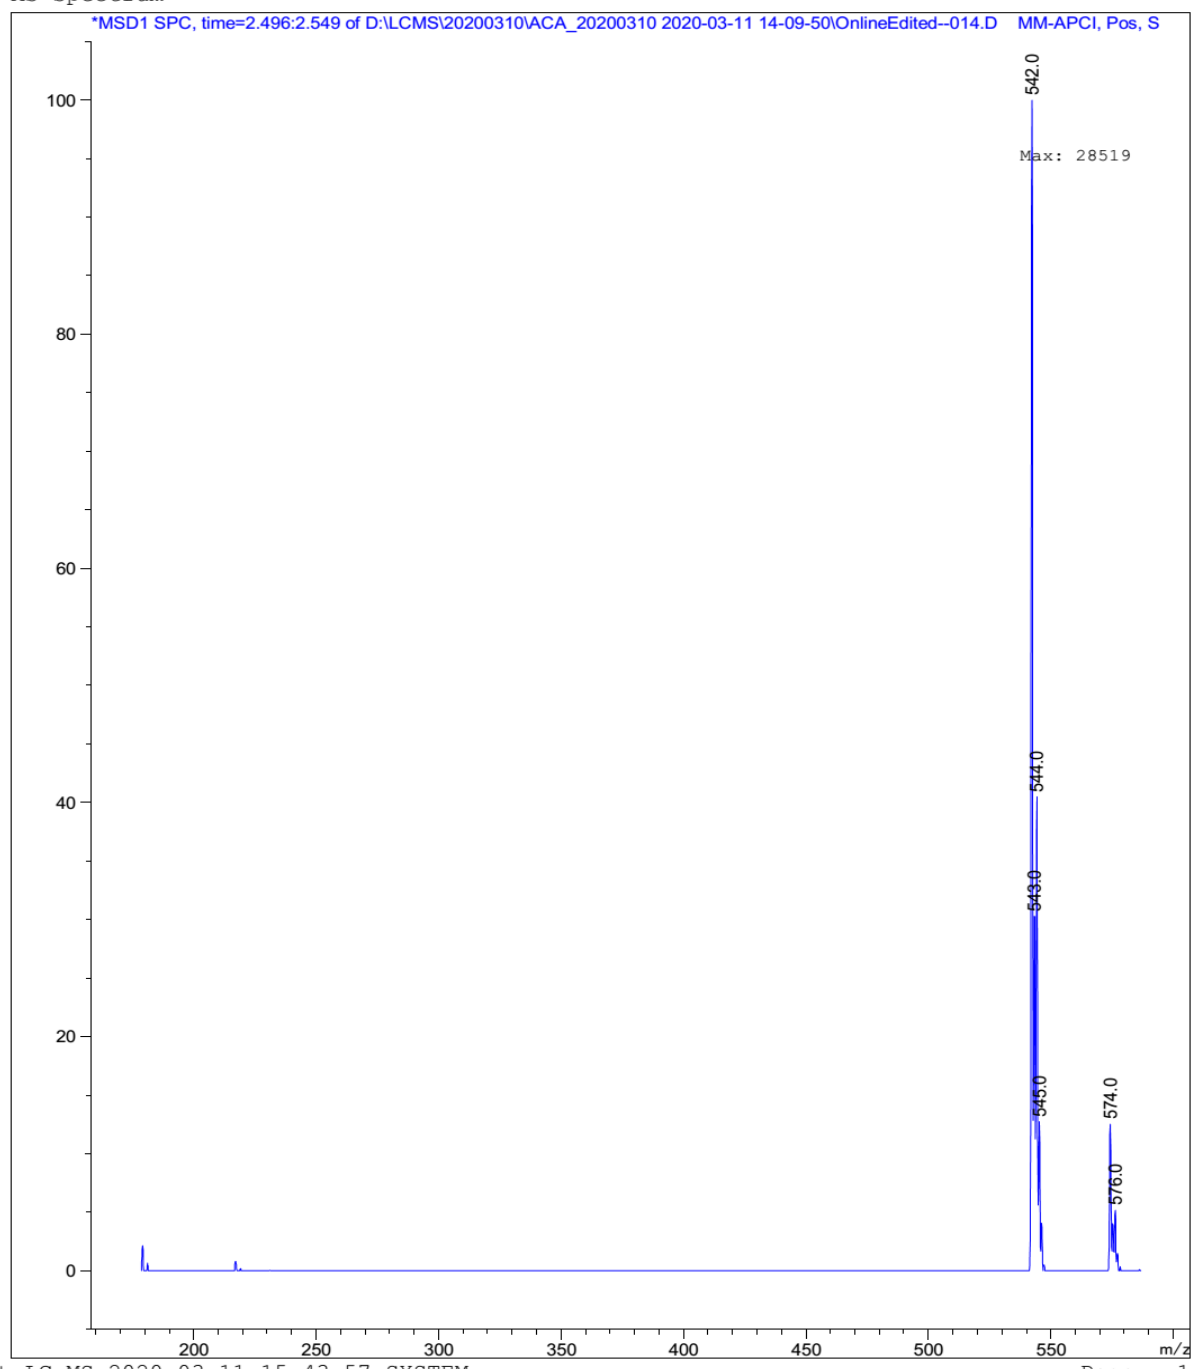

**S93: HPLC-MS of 20**

MS Spectrum

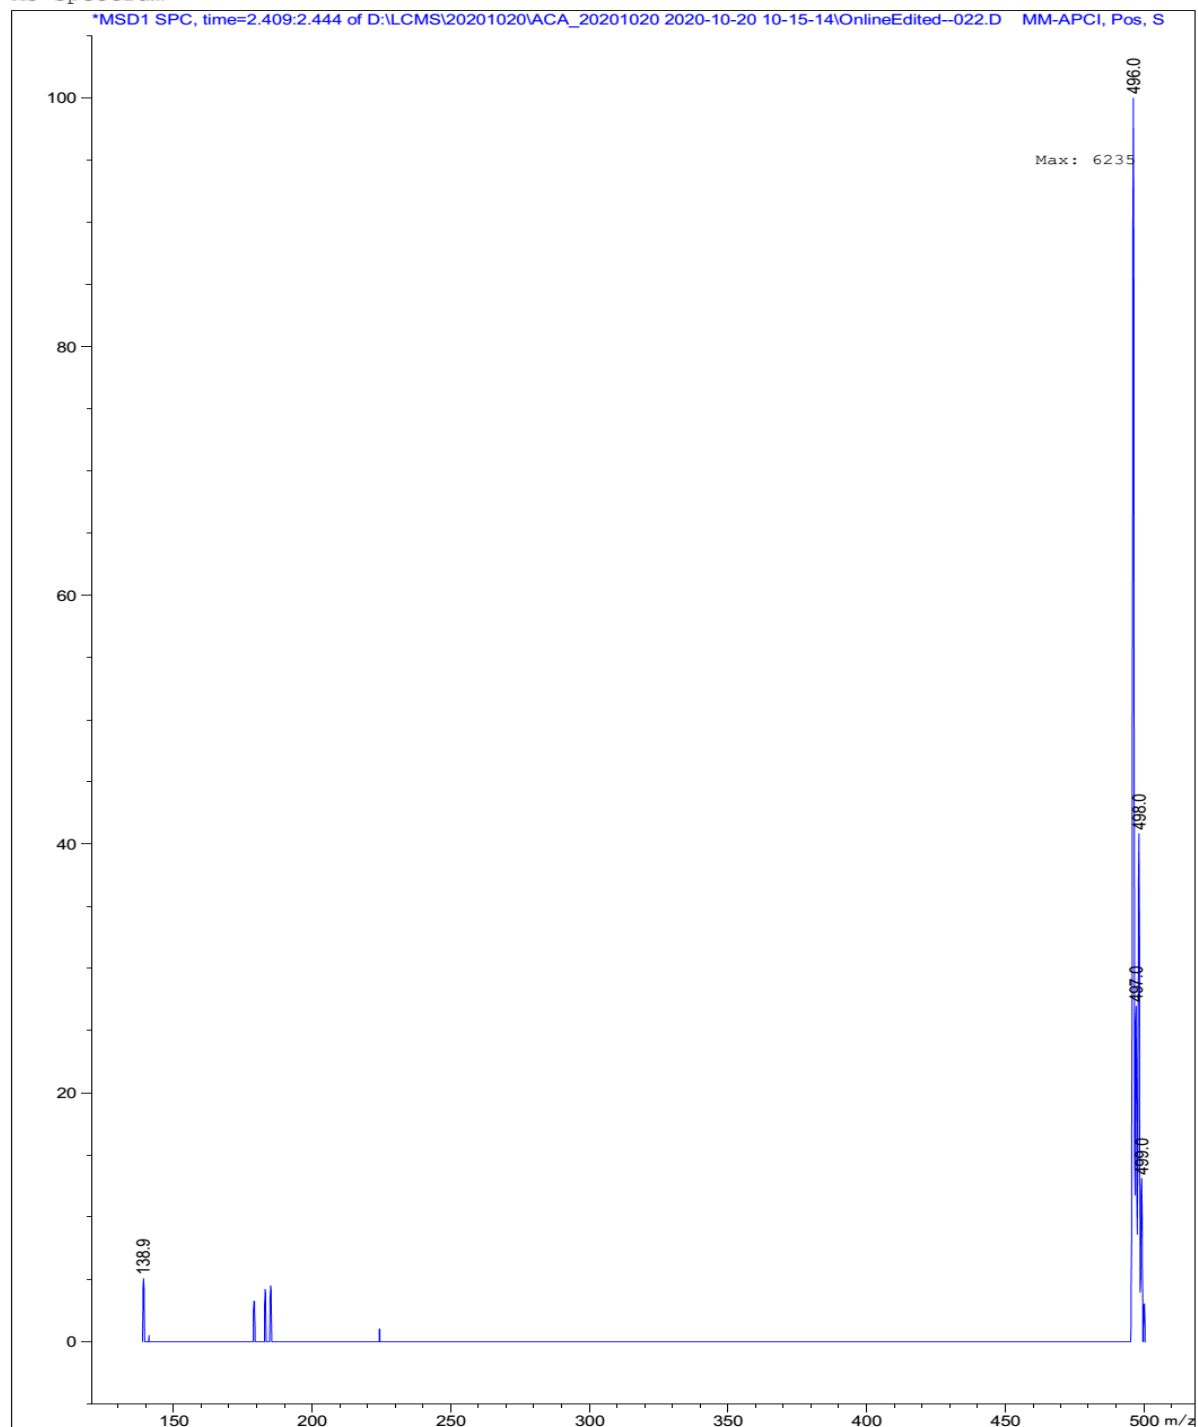

**S94: HPLC-MS of 21**

MS Spectrum

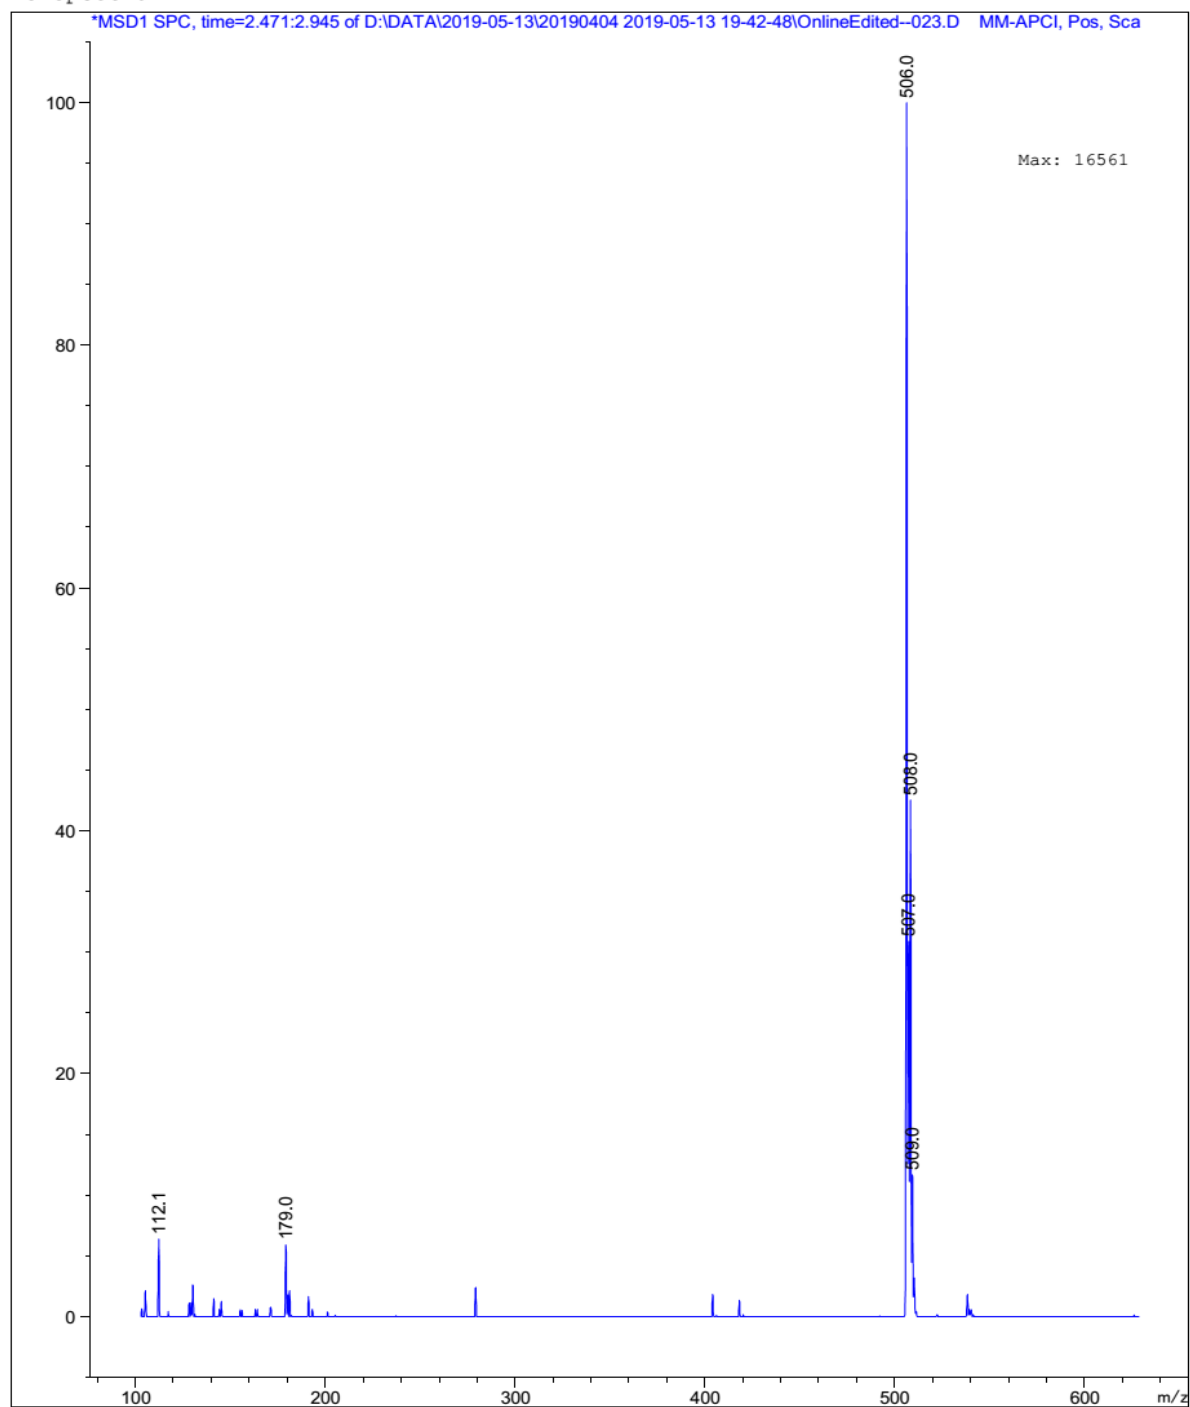

**S95: HPLC-MS of 22**

MS Spectrum

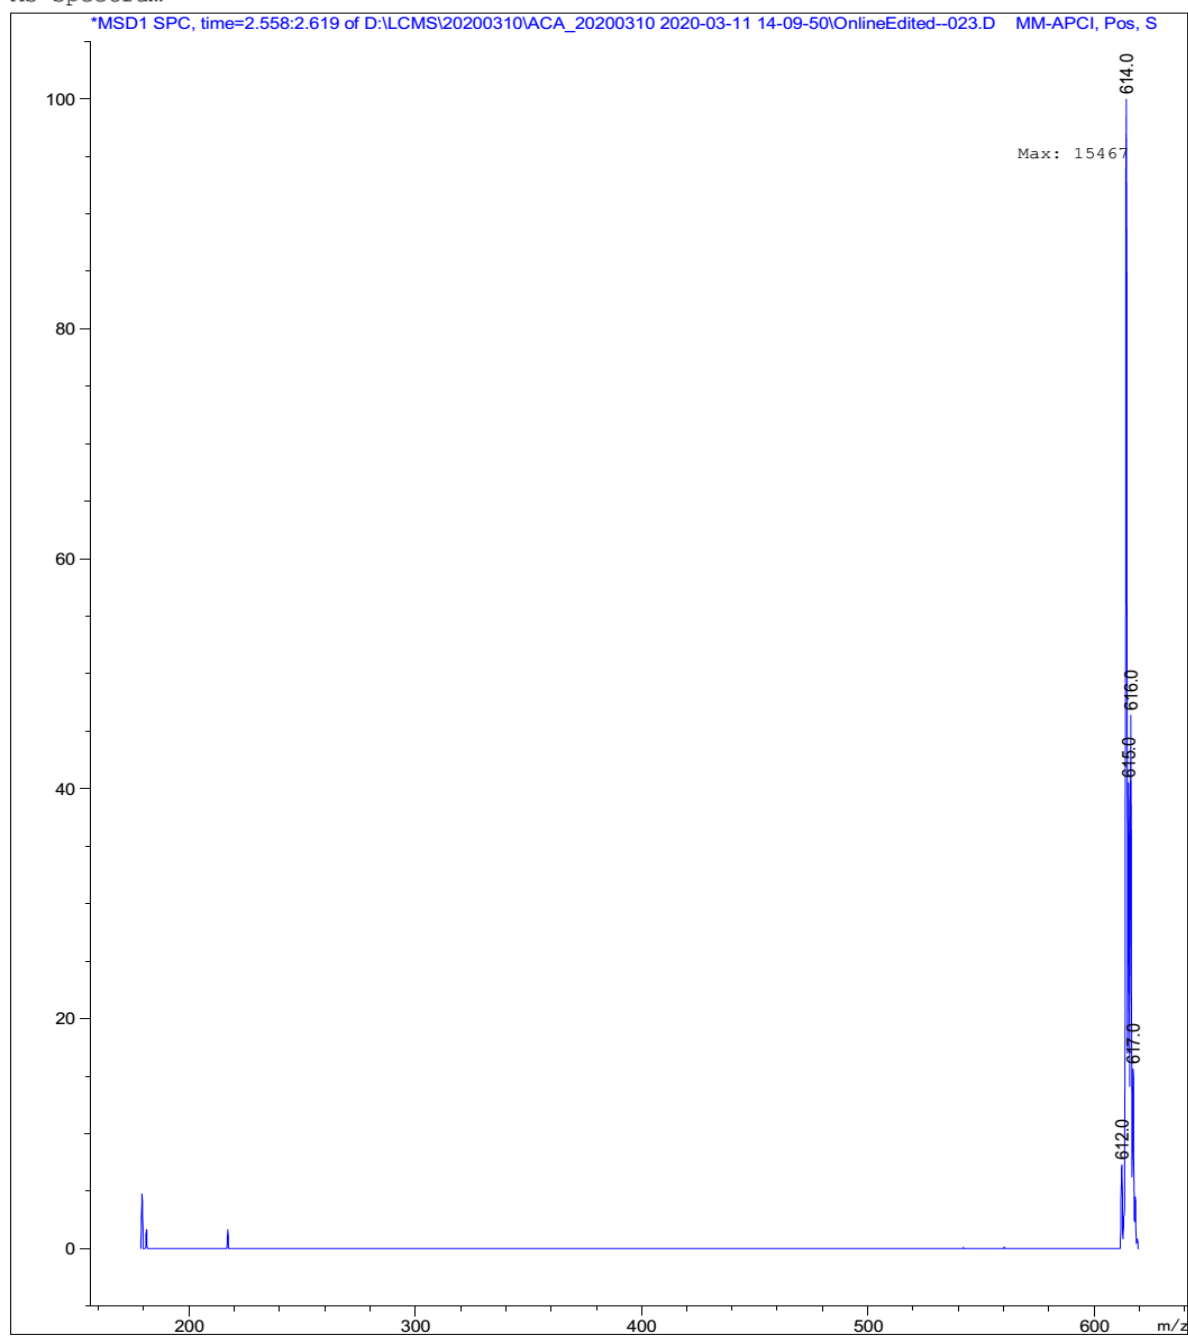

**S96: HPLC-MS of 23**



MS Spectrum

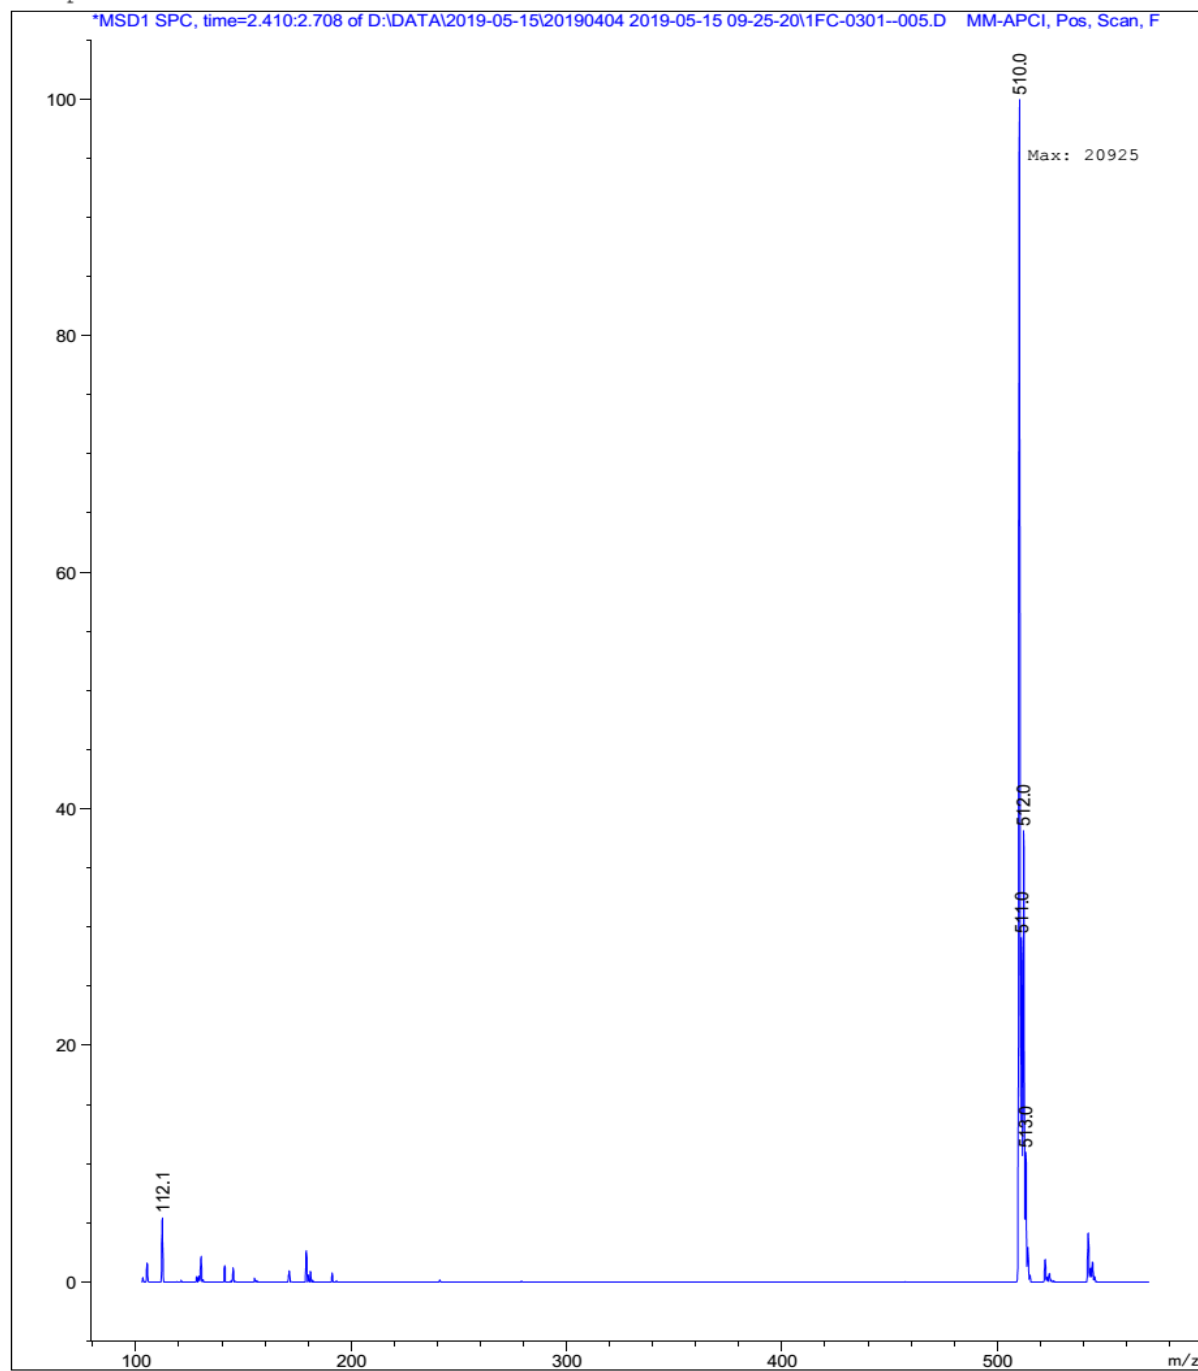

**S97: HPLC-MS of 24**

MS Spectrum

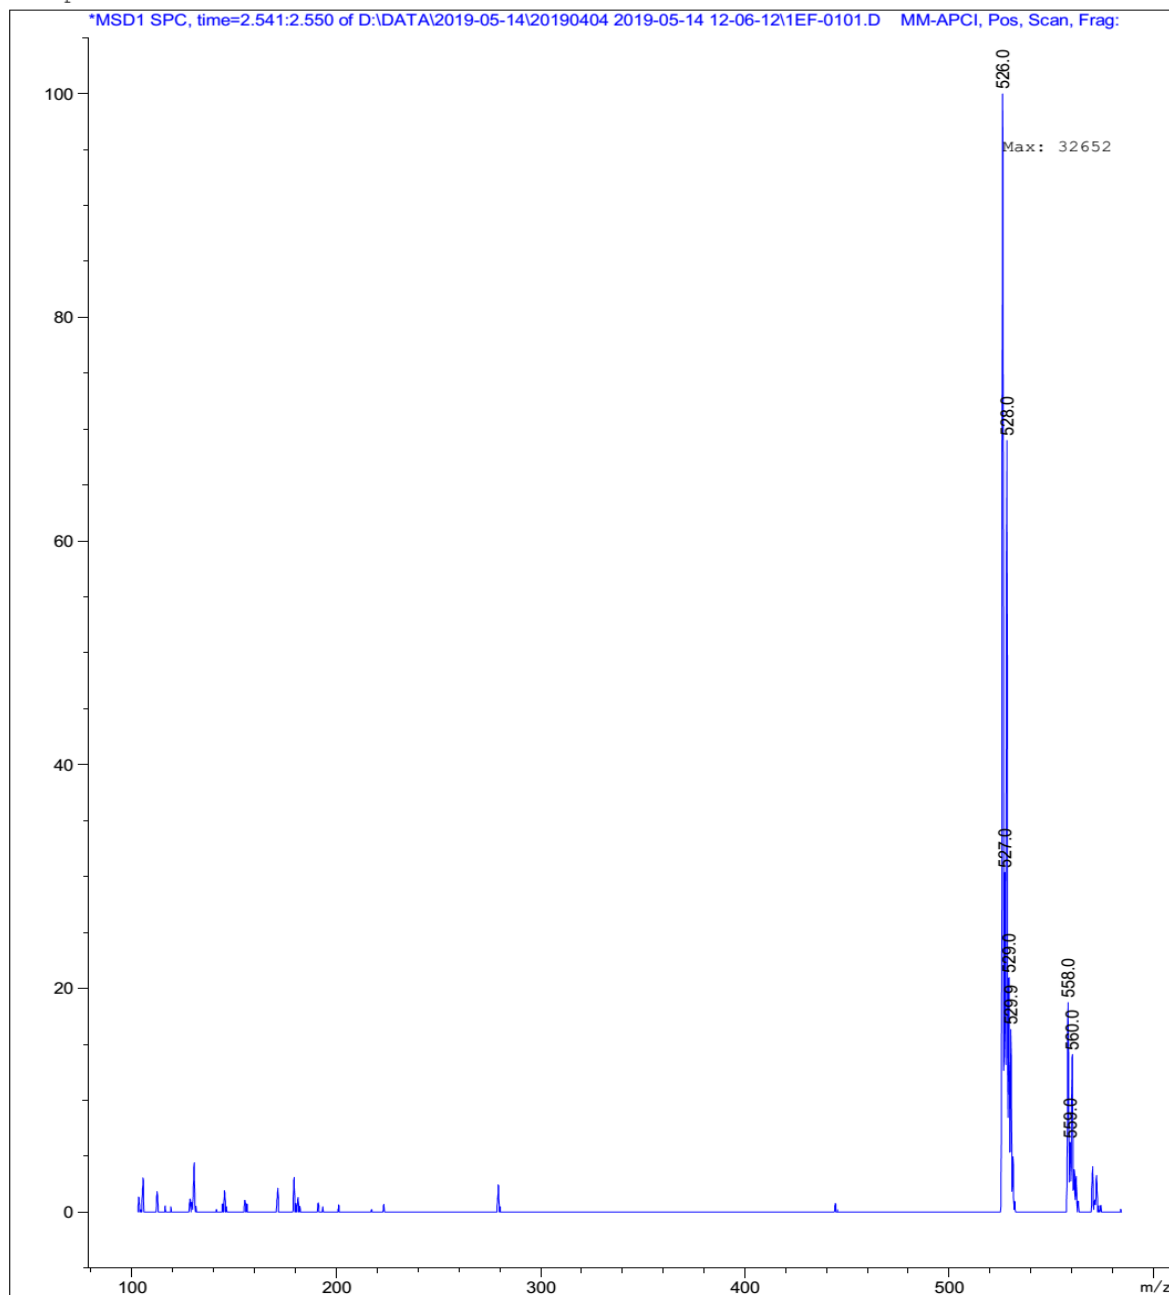

**S98: HPLC-MS of 25**

MS Spectrum

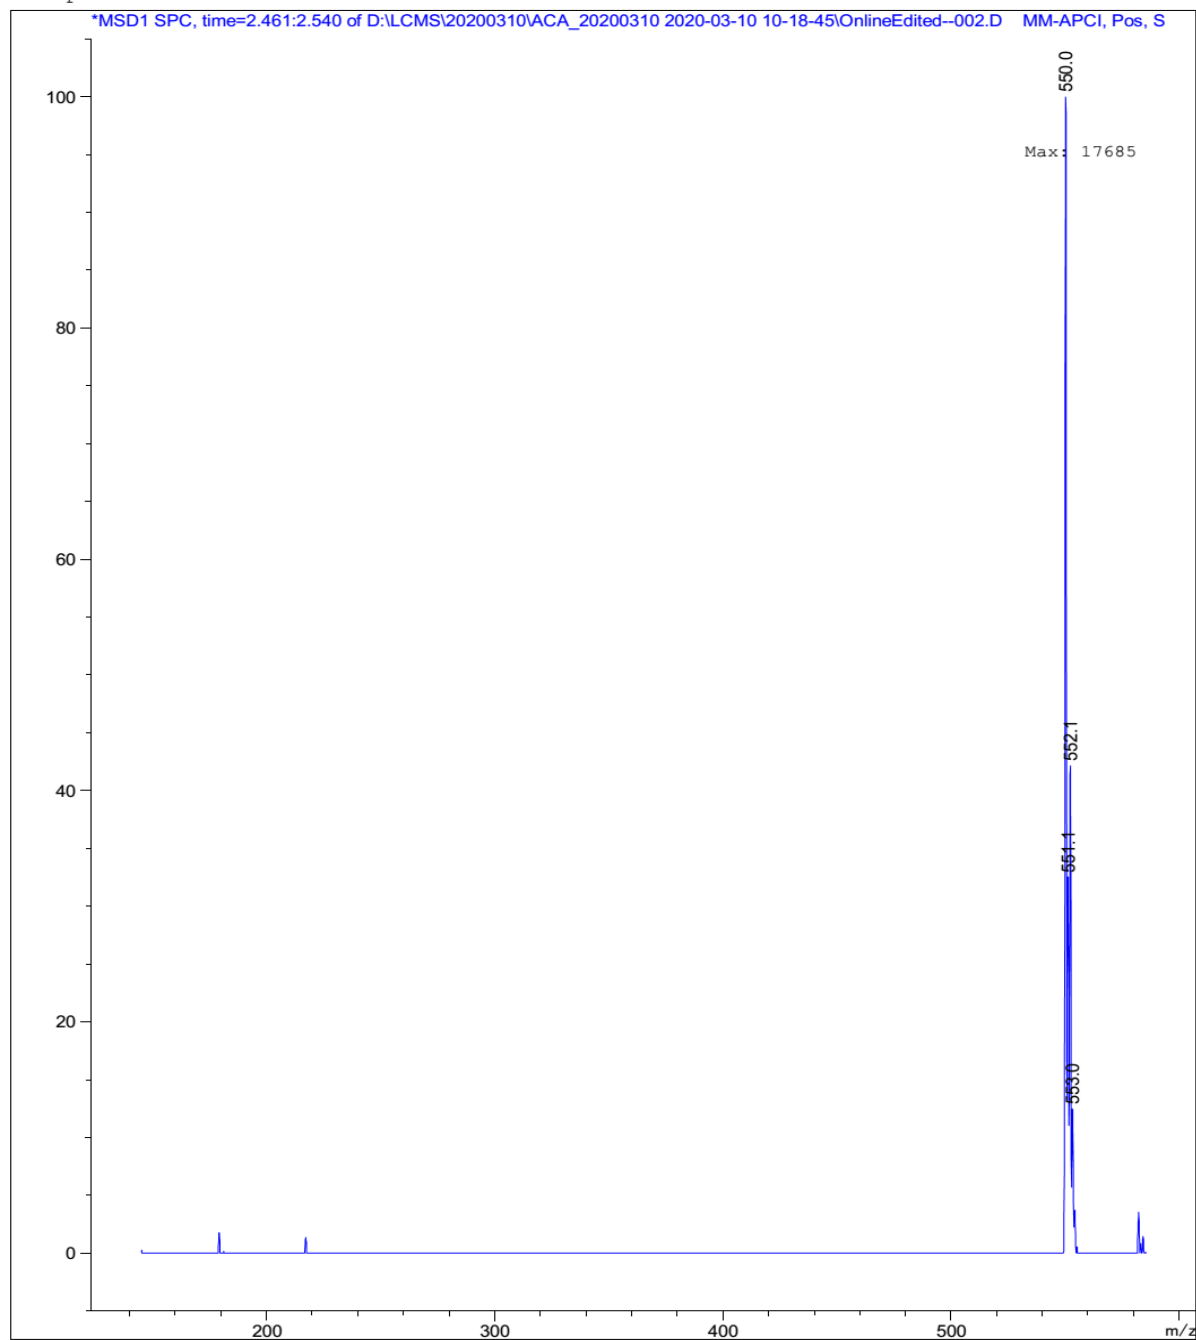

**S99: HPLC-MS of 26**

MS Spectrum

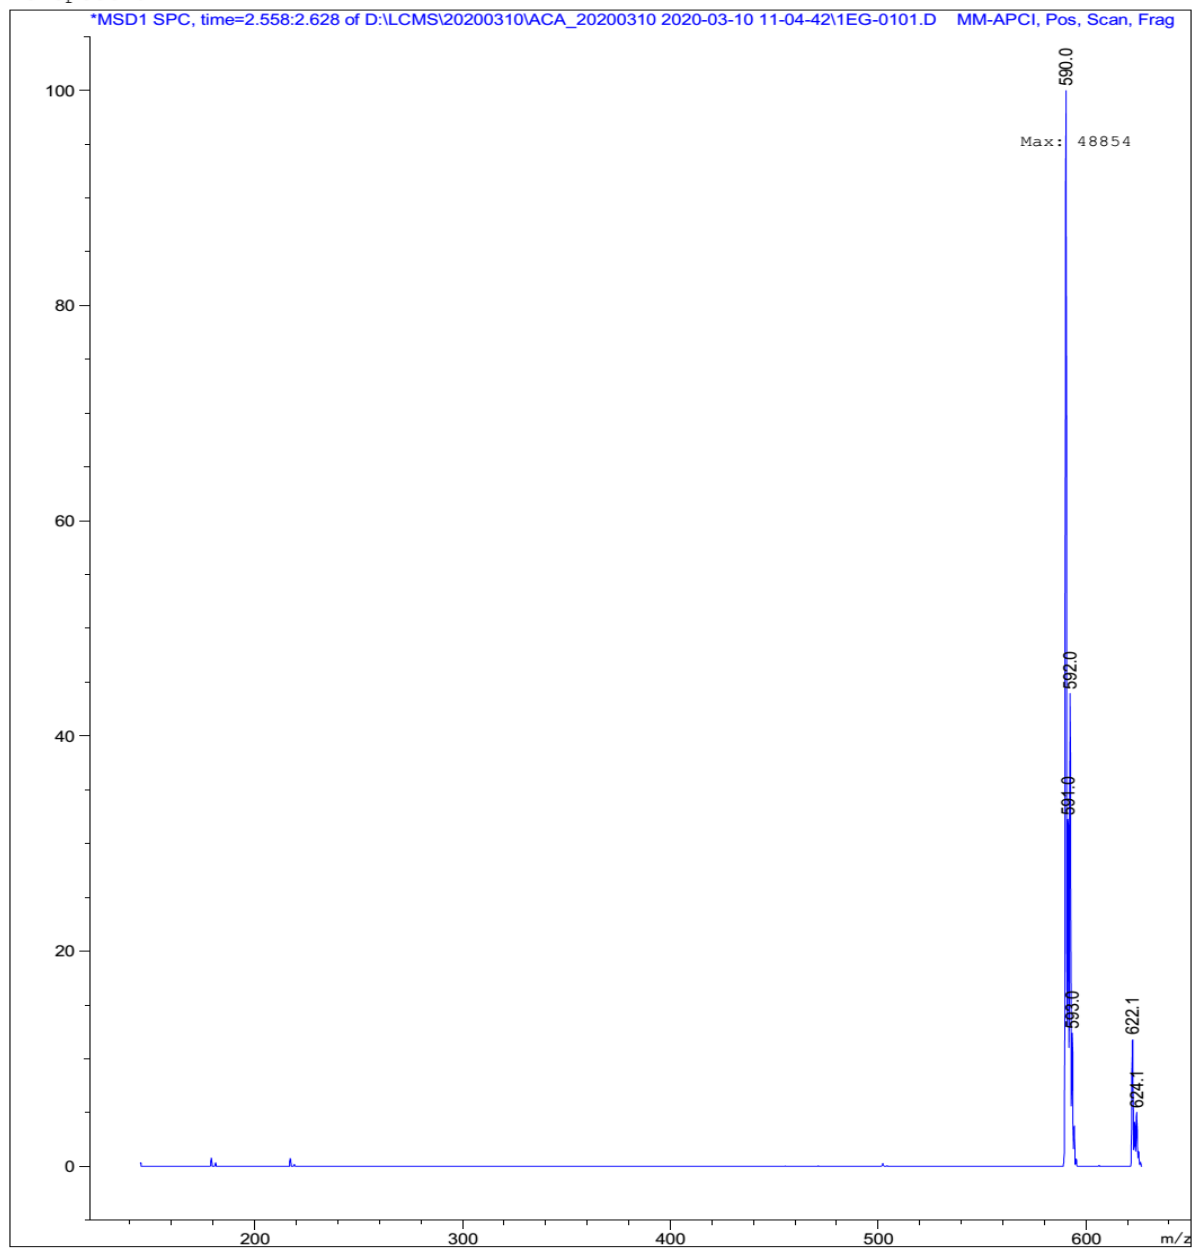

**S100:** HPLC-MS of **27**
